# Supplementary material for: Early Metabolomic Profiling as a Predictor of Renal Function Six Months after Kidney Transplantation
Source: Preprints.org preprint supplement (doi:10.20944/preprints202410.0257.v1), 2024-10-03
Supplement: Supplementary file 1 [file supplementary]

## SUPPLEMENTAL DIGITAL CONTENT (SDC)

**Table S1. Compounds used for the final PLS-DA model, along with their chemical formula, spectrometric properties, the standardized coefficients, confidence interval, and associated p-values (Jack-Knifing resampling) for the variable Cr >1.5 mg/dl**

| Compound                        | Formula                                                                       | Properties                                                     | Standardized Coefficient | p-value      | Confidence Interval         |
|---------------------------------|-------------------------------------------------------------------------------|----------------------------------------------------------------|--------------------------|--------------|-----------------------------|
| <b>3-Methylindole (Skatole)</b> | C <sub>9</sub> H <sub>9</sub> N                                               | m/z: 132,080765<br>Rt: 3,46<br>Adduction: [M+H] <sup>+</sup>   | -0.16695299              | <b>0.012</b> | <b>-0.29594 to -0.03795</b> |
| <b>Guaiacol</b>                 | C <sub>7</sub> H <sub>8</sub> O <sub>2</sub>                                  | m/z: 125,059898<br>Rt: 2,811<br>Adduction: [M+H] <sup>+</sup>  | -0.15992134              | <b>0.040</b> | <b>-0.31206 to -0.00777</b> |
| <b>Homocarnosine</b>            | C <sub>10</sub> H <sub>16</sub> N <sub>4</sub> O <sub>3</sub>                 | m/z: 241,129028<br>Rt: 13,951<br>Adduction: [M+H] <sup>+</sup> | 0.15774800               | <b>0.010</b> | <b>0.03892 to 0.27657</b>   |
| <b>5-Methylcytosine</b>         | C <sub>5</sub> H <sub>7</sub> N <sub>3</sub> O                                | m/z: 126,066383<br>Rt: 8,141<br>Adduction: [M+H] <sup>+</sup>  | 0.15492272               | <b>0.023</b> | <b>0.02254 to 0.28729</b>   |
| <b>Histidine</b>                | C <sub>6</sub> H <sub>9</sub> N <sub>3</sub> O <sub>2</sub>                   | m/z: 156,076614<br>Rt: 13,985<br>Adduction: [M+H] <sup>+</sup> | -0.14781219              | <b>0.002</b> | <b>-0.23791 to -0.05770</b> |
| <b>Xanthosine</b>               | C <sub>10</sub> H <sub>12</sub> N <sub>4</sub> O <sub>6</sub>                 | m/z: 283,068512<br>Rt: 8,486<br>Adduction: [M-H] <sup>-</sup>  | 0.14141625               | <b>0.029</b> | <b>0.01564 to 0.26718</b>   |
| <b>Choline</b>                  | C <sub>5</sub> H <sub>13</sub> NO                                             | m/z: 104,107384<br>Rt: 15,016<br>Adduction: [M+H] <sup>+</sup> | 0.13956783               | <b>0.028</b> | <b>0.01596 to 0.26317</b>   |
| <b>Glutathione disulfide</b>    | C <sub>20</sub> H <sub>32</sub> N <sub>6</sub> O <sub>12</sub> S <sub>2</sub> | m/z: 613,161499<br>Rt: 13,655<br>Adduction: [M+H] <sup>+</sup> | 0.12867136               | 0.065        | -0.00778 to -0.26512        |
| <b>3-Indolepropionic acid</b>   | C <sub>11</sub> H <sub>11</sub> NO <sub>2</sub>                               | m/z: 188,071854<br>Rt: 2,661<br>Adduction: [M-H] <sup>-</sup>  | -0.12850942              | <b>0.001</b> | <b>-0.19942 to -0.05759</b> |
| <b>Nicotinate</b>               | C <sub>6</sub> H <sub>5</sub> NO <sub>2</sub>                                 | m/z: 124,039261<br>Rt: 8,114<br>Adduction: [M+H] <sup>+</sup>  | 0.12825902               | 0.074        | -0.01247 to 0.26899         |
| <b>α-Lipoic acid</b>            | C <sub>8</sub> H <sub>14</sub> O <sub>2</sub> S <sub>2</sub>                  | m/z: 207,051132<br>Rt: 2,506<br>Adduction: [M+H] <sup>+</sup>  | -0.12588711              | <b>0.047</b> | <b>-0.25017 to -0.00160</b> |
| <b>Phenylalanine</b>            | C <sub>9</sub> H <sub>11</sub> NO <sub>2</sub>                                | m/z: 166,086014<br>Rt: 8,604<br>Adduction: [M+H] <sup>+</sup>  | 0.11587927               | <b>0.041</b> | <b>0.00471 to 0.22704</b>   |
| <b>Kynurenic acid</b>           | C <sub>10</sub> H <sub>7</sub> NO <sub>3</sub>                                | m/z: 188,035202<br>Rt: 4,198<br>Adduction: [M-H] <sup>-</sup>  | 0.11255399               | <b>0.039</b> | <b>0.00591 to 0.21918</b>   |
| <b>L-Kynurenine</b>             | C <sub>10</sub> H <sub>12</sub> N <sub>2</sub> O <sub>3</sub>                 | m/z: 209,091873<br>Rt: 8,843<br>Adduction: [M+H] <sup>+</sup>  | 0.11071323               | <b>0.020</b> | <b>0.01812 to 0.20330</b>   |

|                             |                                                               |                                                                                    |             |       |                     |
|-----------------------------|---------------------------------------------------------------|------------------------------------------------------------------------------------|-------------|-------|---------------------|
| <b>Urocanic acid</b>        | C <sub>6</sub> H <sub>6</sub> N <sub>2</sub> O <sub>2</sub>   | <b>m/z:</b> 139,050247<br><b>Rt:</b> 7,991<br><b>Adduction:</b> [M+H] <sup>+</sup> | 0.10565113  | 0.233 | -0.06970 to 0.28100 |
| <b>N-Butyrylglycine</b>     | C <sub>6</sub> H <sub>11</sub> NO <sub>3</sub>                | <b>m/z:</b> 146,081177<br><b>Rt:</b> 7,097<br><b>Adduction:</b> [M+H] <sup>+</sup> | 0.10469998  | 0.061 | -0.00492 to 0.21432 |
| <b>Indole-3-lactic acid</b> | C <sub>11</sub> H <sub>11</sub> NO <sub>3</sub>               | <b>m/z:</b> 204,066437<br><b>Rt:</b> 2,615<br><b>Adduction:</b> [M-H] <sup>-</sup> | 0.10158428  | 0.097 | -0.01908 to 0.22225 |
| <b>4-Aminohippuric acid</b> | C <sub>9</sub> H <sub>10</sub> N <sub>2</sub> O <sub>3</sub>  | <b>m/z:</b> 195,076187<br><b>Rt:</b> 5,703<br><b>Adduction:</b> [M+H] <sup>+</sup> | 0.10137408  | 0.081 | -0.01293 to 0.21568 |
| <b>Indole-3-ethanol</b>     | C <sub>10</sub> H <sub>11</sub> NO                            | <b>m/z:</b> 162,091446<br><b>Rt:</b> 2,668<br><b>Adduction:</b> [M+H] <sup>+</sup> | -0.09839586 | 0.137 | -0.22901 to 0.03222 |
| <b>Adenine</b>              | C <sub>5</sub> H <sub>5</sub> N <sub>5</sub>                  | <b>m/z:</b> 134,047058<br><b>Rt:</b> 7,545<br><b>Adduction:</b> [M-H] <sup>-</sup> | -0.03343797 | 0.339 | -0.10300 to 0.03612 |
| <b>Adenosine</b>            | C <sub>10</sub> H <sub>13</sub> N <sub>5</sub> O <sub>4</sub> | <b>m/z:</b> 268,104065<br><b>Rt:</b> 7,39<br><b>Adduction:</b> [M+H] <sup>+</sup>  | -0.02616427 | 0.308 | -0.07729 to 0.02496 |
| <b>Deoxyguanosine</b>       | C <sub>10</sub> H <sub>13</sub> N <sub>5</sub> O <sub>4</sub> | <b>m/z:</b> 268,104065<br><b>Rt:</b> 7,39<br><b>Adduction:</b> [M+H] <sup>+</sup>  | -0.02616427 | 0.308 | -0.07729 to 0.02496 |
