# Supplementary material for: Early Metabolomic Profiling as a Predictor of Renal Function Six Months after Kidney Transplantation
Source: Preprints.org preprint supplement (doi:10.20944/preprints202410.0257.v1), 2024-10-03
Supplement: Supplementary file 1 [file supplementary]

## Sheet: Polares_pos_Trasplante
medMz	medRt	adductName	compoundId	formula	QCMS1	QCMS2	QCMS3	QCMS4	QCMS5	QCMS6	QCMS7	QCMS8	1	2	3	4	5	6	7	8	9	10	11	12	13	14	15	16	17	18	19	20	21	22	23	24	25	26	27	28	30	31	32	33	34	35	36	37	38
207.051	2.506	[M+H]+	(ï¿½)-Lipoic acid	C8H14O2S2	564274	541500	574403	638342	607855	512074	651700	694411	1.18951e+06	471749	6466.39	619210	903736	986667	1.50388e+06	631529	1524416	675517	1.19062e+06	697665	772376	635077	891677	575950	1.45239e+06	913147	999991	555064	653978	760651	818531	321853	288183	1.00373e+06	1138042	793614	1.50478e+06	1.02282e+06	792069	603622	51094.4	303318	920159	819428	628369
128.035	8.525	[M-H]-	(R)-(+)-2-Pyrrolidone-5-carboxylic acid	C5H7NO3	4.03839e+06	4.72162e+06	5.59189e+06	6.76991e+06	6.92023e+06	8.28517e+06	5.80256e+06	5.29685e+06	775992250	752272400	1080955500	518304750	672089550	686656150	814348950	557596750	850688900	942036400	1393627500	1677980400	786565400	1430261200	524600250	850424500	531270450	525283050	578628950	680639750	935300500	418656275	669410050	704546950	1734947400	1043097100	1242676500	664296650	953408000	618945400	502963650	1394278800	883269900	571136350	732619200	1081827300	731474200
222.097	9.199	[M+H]+	?-N-Acetylglucosamine	C8H15NO6	37715.5	30663.2	31842.9	40078.1	38601.4	43050.3	38040.7	32377	47812.2	70185	93736.9	37661.9	34868.1	16201.7	39730.8	64300.4	36125.1	37301.3	69714.8	53977.9	82932.5	43877.7	45156.1	30399.3	28687.6	51268.5	37090.1	36390	41701.1	41484.1	34166.2	22135	45287.3	40466.8	62964.2	49503.4	34646.9	48792	17045.4	49596.6	72045.5	51643.8	40347.3	35179.1	38687.3
161.045	5.92	[M-H]-	1-6-anhydro-b-D-Glucose	C6H10O5	329653	335397	328277	338621	305835	337437	335095	291681	6044422	6896076	393623000	100880169	8569519	7621641	77881694	11382929	20286761	7293884	14243497	10728491	8387812	288550775	9274915	17360712	14046483	9553781	74681350	5781078	96853125	16695106	9526122	4931311	18396142	15159069	206614262	11176180	435053950	43244428	6156076	125869650	33054691	8420369	6535874	105997962	12602365
141.066	8.212	[M+H]+	1-Methyl imidozolacetic Acid Hydrochloride	C6H8N2O2	4.88445e+06	5.98749e+06	5.43011e+06	4.20227e+06	3.80391e+06	6.67462e+06	4.32151e+06	5.0948e+06	7911144	23801206	34541608	12913120	12426784	9998517	12266396	8691727	18116702	5186418	13975536	12911923	2.9498e+06	27141560	6.55091e+06	6.99359e+06	13238096	4.71213e+06	8.32226e+06	6.37935e+06	29777062	1.82606e+06	4116746	9083921	4191604	39811236	6.44873e+06	10216511	44474488	6036778	3745319	15926780	19726458	8.29168e+06	11768093	15249440	5.76966e+06
170.092	13.634	[M+H]+	1-Methyl-Histidine	C7H11N3O2	7.40771e+06	7.58773e+06	5.79017e+06	6802222	6.57747e+06	6.523e+06	7.23368e+06	7.61466e+06	3205348	38959212	9915183	5.67079e+06	9403704	9472817	29515914	6.57971e+06	9889706	5066068	14605701	6187432	4212913	27688110	14316881	3.99312e+06	17551518	2.63141e+06	8670865	5.98765e+06	6661258	2.11637e+06	6.081e+06	18785906	13847747	38816480	8533443	10275350	37769732	7938428	5131369	10984582	16486299	16296720	8738755	15468429	1.26807e+06
154.999	10.452	[M-H]-	2-5-Furandicarboxylic acid	C6H4O5	81448.3	76886.3	72069.4	88524.7	93459	81758.8	85676.4	87241.5	23581400	20458567	104070500	19768136	23584955	34647997	49700975	9606762	27687022	31427525	28803509	34783822	11078902	145818138	15280744	33961459	8920346	22654717	17472486	3302964	48556659	18593883	4093402	6936799	32351778	19001369	59264281	47382425	61917506	18262294	4789914	64134169	54735119	30154584	16524781	32590797	20390800
189.088	13.371	[M-H]-	2-6-Diaminopimelic Acid	C7H14N2O4	31156.9	39815.4	33390.6	33851.6	31872.5	40841.6	41432.6	37142.1	6513306	23963358	3985738	5236266	20752100	3881266	5398776	7237791	6857484	8798585	5595514	5996993	3505229	8608034	7634290	4822398	3952917	6567287	5206999	4148145	4883675	3731156	6175823	4520954	18084742	9920876	10236234	3239228	6231301	5240694	1387631	7833608	6134062	3742667	5742206	3100910	6383136
153.02	1.865	[M-H]-	2-6-Dihydroxybenzoic acid	C7H6O4	2.47757e+06	2.16186e+06	2389723	2.31357e+06	2.22744e+06	2.32722e+06	2347864	2.3418e+06	295594900	339882925	349896275	498372750	788924250	212630125	270160400	466086600	591767650	344270575	251720225	405518525	139170138	793607650	452018000	386126700	259078975	330496275	358484800	206875038	338986200	371104100	216016600	1577531500	221029175	200899788	412936325	238879725	901367600	496510800	185562350	770089050	468546800	243029225	656675550	807027650	444735800
138.091	8.489	[M+H]+	2-Amino-1-phenylethanol	C8H11NO	14815.1	15835.8	15240.1	16905	12374.9	16908.2	18602.3	21677	28761.9	70489.7	22646.1	9455.22	30066	21714.4	99932.4	12745.5	32293	68280.7	55902.6	79731.6	51511.5	47021.9	27802.1	34598.1	49208.6	33448.5	6956.6	21658.6	28651.2	28385	11862.5	8584.73	96293.6	96939.8	38928.8	7303.49	9501.02	19318.7	1890.87	22845.3	239815	51713.5	7699.02	35473	56527.1
168.03	5.609	[M-H]-	2-Furoylglycine	C7H7NO4	843538	870576	720370	750833	779686	801320	900130	600112	120675712	505739850	281573275	23769767	112236838	82874350	767641600	18328352	235367525	125880688	371074700	408181400	153072012	530577650	113674075	472384600	104433281	161469150	19562186	72512631	246812725	44537334	68372119	35129900	937323000	559617250	356747800	14409312	66882619	51642728	8412596	152956288	1782654600	150186538	42601059	313287300	401818275
147.03	11.78	[M-H]-	2-hydroxyglutarate	C5H8O5	140618	134711	145151	144772	160679	146298	177821	156465	33992541	138879062	107012288	25190231	59045062	20573623	54595456	18384955	81745719	66962594	84948619	62398581	46726141	57549919	65991569	144791800	49523934	88991506	13159611	42847709	34057103	44563547	38653225	34884403	48563150	66190081	47975725	19736480	51298566	26856288	13512827	29147116	131496438	56122200	27541656	34424609	48843641
161.045	11.594	[M-H]-	2-Hydroxyhexanedioic Acid	C6H10O5	4.38457e+06	4043306	4.39688e+06	4.43148e+06	4.41409e+06	4.83301e+06	4.69414e+06	4.97283e+06	612432550	624646250	657029750	599574250	492546550	571956950	602503850	538840900	725517750	632584800	590135350	651287850	634825250	665028950	660707750	467912850	881997600	519419650	507473600	460083750	903735700	667745250	550230050	721248800	796389750	527801750	553650900	539202800	771004950	553945050	574989950	659746250	534627450	984097500	598457200	475299150	510644350
159.103	2.562	[M-H]-	2-Hydroxyoctanoic acid	C8H16O3	505822	549171	461731	440149	547347	639890	524848	494970	81684219	99097656	106647938	90459031	60244744	67338869	77578756	121333862	117232838	101656131	56323281	73547819	137733700	86090050	116251738	89129469	72443931	52918531	94353481	73197219	42615353	80523644	41850397	78384106	79460481	57492844	44767175	132294038	49912638	42941722	100858525	31313094	157239512	118480612	90668994	114552950	132765488
101.024	2.54	[M-H]-	2-Ketobutyric acid	C4H6O3	331989	689710	406390	516402	604688	374438	605976	425195	48161384	57331100	51963416	54497819	24192595	39994203	47604038	81026900	55455775	61186494	60610231	58867231	133328200	107898488	93664931	96522169	44050647	87783356	41169125	150180962	126446350	26384097	43938459	147252512	32522684	73412456	125530112	59150219	89962225	64870531	29406284	20155480	50598334	90644419	46300872	91361006	49631891
160.097	6.013	[M+H]+	2-Methylbutyrylglycine	C7H13NO3	150038	132019	130674	126708	131122	134242	155542	147886	129009	142903	187853	173000	148289	81278.3	155685	197590	300317	136300	268352	188420	105229	210648	96833.9	135724	135779	107279	370405	45171.3	147901	73346.2	53011.4	71411.7	130190	242814	269155	125717	575952	58633.9	70414.6	178666	116000	51893.8	94901.5	194579	74439
131.035	11.637	[M-H]-	2-Methylsuccinic acid	C5H8O4	1.02704e+06	1.11268e+06	1.06461e+06	1.08871e+06	1.11853e+06	1.12522e+06	1.17613e+06	1.13718e+06	139891450	186846950	154545250	141592462	116158812	133870250	141211662	119418062	139851862	168177150	141093638	193304888	175699138	146955350	156122062	230674375	202636838	118002762	117308712	106331838	209401662	148993038	149080438	172869400	130334950	148381388	128341688	123411412	179236588	134632488	134198350	155011462	130919988	245762025	132874750	118378488	122172650
115.04	2.409	[M-H]-	2-Oxoisopentanoic acid	C5H8O3	6.21236e+06	6.9967e+06	6609332	7088930	6.43489e+06	7.00168e+06	6.73391e+06	5.82883e+06	812146400	787716950	1538020500	558096250	876721700	663895750	748122250	564303600	1129750100	715878850	992436300	710287050	1151881100	1237910100	797267850	892754600	657733850	1518708400	576012750	1011528700	675293800	842532900	573114750	1125844500	327288800	778227850	710964000	798340950	624146000	554829900	539445050	336124675	509480150	949735900	532907450	747563350	630085150
163.076	2.586	[M-H]-	2-Phenylbutyric acid	C10H12O2	476906	314111	367064	435303	574580	441091	439309	411110	76729250	71625744	218241475	68041644	50534341	44954938	80686381	76487731	258827425	52385934	58534100	99776144	46556366	45552884	66632838	92644181	52551794	84803100	33169712	49486309	22564723	48531312	28387372	19251992	75012294	52219716	57606281	21928019	48330116	20896339	31714666	58789444	85188531	91382850	62181869	24387958	72363094
149.061	2.553	[M-H]-	2-Phenylpropionic acid	C9H10O2	237880	257496	256922	329941	319428	213493	190801	184779	33783509	72111025	74238956	255370750	45445238	50654872	61885069	60627450	57595112	51534934	67631669	43923984	459313750	64261819	67697225	35189134	31887891	90110950	37486097	33105116	43548534	228343900	166012612	112308950	36064734	53432356	38986103	47986678	43597078	58822706	43035566	49024816	59168356	49602441	59035500	37872922	49957900
237.077	2.76	[M-H]-	3-4-5-Trimethoxycinnamic acid	C12H14O5	123199	118908	111420	103329	99880.7	85359	109588	92743.1	6771676	12406556	6392733	5173723	3048827	3051738	3901460	2982858	5723866	3545244	16465489	2048962	3771582	3471493	6219191	4056857	2048032	22477883	0	0	1518718	1460118	5390878	2899202	9036450	8651227	13434281	24086436	1514418	2926428	2493051	2106675	12444437	2940313	6037093	14411958	7278966
153.055	2.649	[M+H]+	3-Cresotinic acid	C8H8O3	14892.4	15300.4	12889.5	13248.1	12161.3	16227.7	17549	18550.7	6783.26	7124	9044.12	5072.47	33141.3	15137.2	8884.48	5662.06	20082.4	16680.8	7870.57	7697.51	19304.8	13693	12371.5	9202.29	9410.47	6767.41	3330.95	3147.95	11579.8	8868.74	5329.88	10188.2	7515.9	6270.63	6336.81	96080.5	18248.7	7208.86	16899.3	23839.5	44126.9	9373.52	8474.93	8408.5	14474.4
137.024	2.167	[M-H]-	3-Hydroxybenzoic acid	C7H6O3	2279549	2.50004e+06	2.5854e+06	2.63016e+06	2427830	2.74703e+06	1.9943e+06	2.57628e+06	2332460200	592357950	93478731	92019950	87325169	101575544	95237281	120383550	175998700	42534334	170777888	755583950	7360212800	88624269	61857975	57774300	79450819	159249650	50039241	84087469	134425250	136230950	58344469	75352156	66069206	81624350	154139850	60813806	84292481	118234012	65375825	224236475	126932988	127922412	112761812	248646400	114787762
153.055	2.649	[M+H]+	3-Hydroxyphenylacetic acid	C8H8O3	14892.4	15300.4	12889.5	13248.1	12161.3	16227.7	17549	18550.7	6783.26	7124	9044.12	5072.47	33141.3	15137.2	8884.48	5662.06	20082.4	16680.8	7870.57	7697.51	19304.8	13693	12371.5	9202.29	9410.47	6767.41	3330.95	3147.95	11579.8	8868.74	5329.88	10188.2	7515.9	6270.63	6336.81	96080.5	18248.7	7208.86	16899.3	23839.5	44126.9	9373.52	8474.93	8408.5	14474.4
188.072	2.661	[M-H]-	3-Indolepropionic acid	C11H11NO2	803887	799053	703620	706043	928098	718314	650461	798254	267941800	126336538	56111381	277750000	390649925	211483950	232848525	122955138	290167775	39134466	205307038	121986025	234237525	10704316	145646112	256748725	81687181	155463350	48323347	51952253	83471131	496683750	201305188	299725000	254199425	70873769	50964159	81503906	77292875	68076869	294687525	98011119	16946911	54870650	293835075	94579819	156755838
212.002	1.903	[M-H]-	3-Indoxyl sulfate	C8H7NO4S	154369200	156710576	157747424	170424368	146101488	159508032	164525712	162027632	50974595200	116301196800	10375684000	24978995200	25583348800	38967849600	58241542400	16000065600	39453680000	20932987200	58086035200	81484678400	16965643200	95960480000	40739100800	30195379200	8709674400	35234060800	21780984000	17565736000	88451430400	8613157600	48016204800	27202710400	82343622400	61893292800	80839404800	30835481600	51423836800	21342180800	31296259200	79311443200	3142602200	34584444800	21163780800	75576121600	23634500800
159.066	11.034	[M-H]-	3-Methyladipic acid	C7H12O4	66590.3	77390.2	79018.3	95923.9	92147.1	81791.9	97233.1	90694.6	21969838	29745491	60239962	17157564	25976477	13249767	133279288	11201373	38008575	21077617	43663397	23087856	25073017	32380653	30013972	50643084	15256844	30946922	5129267	11933216	18420067	20260658	21233583	22550431	54100169	50080278	86025756	9897053	21434092	13836400	9947206	18756906	31140216	23813031	32908606	47784275	11570334
143.035	11.586	[M-H]-	3-Methylglutaconic Acid	C6H8O4	2439404	2.33218e+06	2.39571e+06	2.46656e+06	2.45296e+06	2667166	2.51913e+06	2.58075e+06	321186600	319645075	311879275	315170175	276508100	317683700	320738875	295800600	330102425	339390700	319431575	328947800	337867600	337719625	371461775	246167075	473248250	271129000	261494800	249126550	487476850	355720725	304133075	391520925	281243000	283008175	291048300	280900775	395268500	304346725	306870425	361222475	296959000	515711700	317411875	252328100	292611625
132.081	3.46	[M+H]+	3-Methylindole	C9H9N	54078.4	40775.4	46316.4	40624.6	49280	56294	50300.8	45867.8	107825	169174	1609.21	33061.6	110186	140109	143367	82976.3	61877.6	40762.1	175817	154504	223246	3303.54	62413.1	327838	71091.6	20316.8	66657.9	62102.7	86110	46448.6	19095.8	91675.6	66329	62088.9	173310	77852.9	397006	70682.2	70250.9	48803	837.56	32376.8	125073	172719	156910
151.076	2.692	[M+H]+	3-Phenylpropionic acid	?C9H10O2	21450.3	14421.9	19808.9	15184.1	16791.2	17163.4	22341.3	23172.2	17014.9	37353.5	15897.9	5725.49	18590.1	8912.27	25704.3	3701.55	40219.4	46376.3	13627.8	18181.7	42633.6	21404.4	47409.4	15693.8	29716	10277.2	3614.3	11598.5	4733.46	22203.1	9499.81	99311.2	21405.2	11668.5	9532.91	4955.4	2297.13	10759.5	8557.93	7307.73	357890	18465.6	36468.9	12605.6	108234
133.061	9.967	[M+H]+	3-Ureidopropionic acid	C4H8N2O3	8553.41	14115.8	15922.5	15385.9	22170.6	14152.8	18398.3	22177.5	23896.9	37786.7	38944.9	16147.7	16603.3	20350.2	20225.8	17727.2	22561	16380.4	37526.4	25916.9	50427	9342.91	5660.12	22294.4	23144.7	9990.2	12757.9	24591	17173.5	15964.6	27502.8	30137	19448	19027.4	12820.3	22266.4	11880.3	12603.4	12939.1	20916.8	49062.5	27726.7	32261.5	27731.6	15501.3
104.071	10.932	[M+H]+	4-aminobutyrate	C4H9NO2	5.3426e+06	5.06456e+06	5.13488e+06	5.19727e+06	5.17033e+06	4.73244e+06	5.11875e+06	5.19642e+06	14941180	8157760	4846592	4.692e+06	2.63111e+06	2.80328e+06	7023912	3.63066e+06	10698841	7.26706e+06	4445156	3.13173e+06	3448306	9859996	5.0619e+06	3468930	5.01165e+06	5.89756e+06	3.76255e+06	3.16665e+06	2.70147e+06	4.1346e+06	10113827	2.18985e+06	10522064	10714484	8446409	2514342	5293719	10247168	2.44427e+06	3897918	9850177	1.96551e+06	5.50773e+06	6.34105e+06	4429918
195.076	5.703	[M+H]+	4-Aminohippuric acid	C9H10N2O3	52392.8	63400.2	70984.6	65141.7	54606.5	66693.9	51031	60124.4	168050	167798	227081	34192.8	136865	126880	216120	47434.1	108775	34722.9	148048	322269	56201.7	516697	121668	147526	40399.2	71094.5	27702	123962	242208	52571.5	74529	134210	305437	303425	197692	48515.3	79339	78889.9	68545	70538	249778	51866.3	111232	254335	166551
146.092	11.884	[M+H]+	4-Guanidinobutanoic acid	C5H11N3O2	1.27001e+06	1.3367e+06	1.37204e+06	1.44133e+06	1411667	1.43201e+06	1.49179e+06	1.51646e+06	1303889	2143620	5379800	905508	1.99205e+06	1404604	1.53839e+06	907286	1466581	579800	1.76821e+06	3.5266e+06	1.61644e+06	6037544	1.59397e+06	2.40308e+06	1.23e+06	972478	796806	1.59147e+06	5.09237e+06	695792	2.75281e+06	1.43547e+06	1850305	7806698	2.65786e+06	1.41994e+06	3925014	810692	1000405	2350330	2961976	2.13122e+06	2.30264e+06	3920892	1.14459e+06
153.055	2.649	[M+H]+	4-hydroxy-3-methylbenzoic acid	C8H8O3	14892.4	15300.4	12889.5	13248.1	12161.3	16227.7	17549	18550.7	6783.26	7124	9044.12	5072.47	33141.3	15137.2	8884.48	5662.06	20082.4	16680.8	7870.57	7697.51	19304.8	13693	12371.5	9202.29	9410.47	6767.41	3330.95	3147.95	11579.8	8868.74	5329.88	10188.2	7515.9	6270.63	6336.81	96080.5	18248.7	7208.86	16899.3	23839.5	44126.9	9373.52	8474.93	8408.5	14474.4
179.035	2.503	[M-H]-	4-Hydroxyphenylpyruvic acid	C9H8O4	266031	305707	312166	291552	380825	353713	235149	249722	17713083	30344684	20885120	55410769	23480345	272822875	10728665	13044388	36162975	20398695	16154602	20292936	65465144	841803100	12286097	22831905	68840469	22674831	135402012	31249159	15009864	19298180	101253000	15418534	17525586	41075934	1243358700	99331469	340606000	15076502	804599	46370175	55773569	11914888	27028316	180685362	185445462
115.076	2.678	[M-H]-	4-Methylvaleric acid	C6H12O2	1.34179e+06	1169589	1316469	928012	1897184	1.12111e+06	1.54716e+06	1.51099e+06	301516875	194701400	428623650	196777488	203913912	231743775	253410725	242848075	589266550	267293175	267462000	236366725	369707575	213830325	197648462	231008825	144418388	169884362	168142050	186224262	159984738	186281462	158214750	208192888	169424200	175574338	107784938	186603750	155626662	172594238	174425200	90778131	167555700	170121538	170552188	168654662	200885700
184.06	2.947	[M+H]+	4-Pyridoxic acid	C8H9NO4	1.0167e+06	1.20389e+06	1.20434e+06	1.50684e+06	1.3901e+06	1245407	1.19807e+06	1.31033e+06	1.07841e+06	1.1674e+06	1.94542e+06	1.60548e+06	2.57523e+06	1.43657e+06	2.38107e+06	1.50117e+06	966791	460281	2071531	2984000	6.97744e+06	1750314	515797	4.28279e+06	601330	1.73382e+06	554144	1.58262e+06	1.50826e+06	2.86217e+06	64503252	2.79123e+06	1.06675e+06	2799575	1.3079e+06	3021178	1.39584e+06	1.11491e+06	2210253	798923	3.37717e+06	3042333	1.2265e+06	3.66685e+06	1991976
116.072	11.181	[M-H]-	5-Aminopentanoic acid	C5H11NO2	12828505	12568083	13092611	12664112	12827689	13317920	13654465	14106707	1341607200	1641107600	1343269100	1339593600	1591434100	1123893900	1621480100	783951450	1398506400	1306075500	1840326200	1474220800	903107400	1953703400	1627494500	1071173600	1612207200	1809517200	1251053300	1347434900	1588230700	1117204500	1287389300	1500176700	1036959300	1921807600	1762162400	1456129300	1694730800	1538850700	1048348500	1877579800	1096052900	1056774500	1288421300	1406695700	1166243300
193.035	11.712	[M-H]-	5-Keto-D-gluconic acid	C6H10O7	2.62202e+06	2952462	2.80018e+06	3085484	3.07583e+06	3179541	3.57216e+06	3.31401e+06	680109000	788169850	1689560400	344769100	303990975	322632400	821802250	332234200	335706700	848211700	844188600	1315863200	277826275	1491818400	504694050	596691050	430261150	784194150	320978300	357070075	1209152700	319808575	458708650	211587850	1143740000	1428773900	1280544500	388629725	1101922900	406885425	549700600	713177750	1099800300	707403750	338471175	466786200	214245250
126.066	8.141	[M+H]+	5-Methylcytosine	C5H7N3O	38507.2	38687.7	28807	36834.5	38906.2	35744.8	40079.1	33808.1	60472.9	130501	49513.8	46513.6	57365	58913.8	50532.7	88912.4	185142	59834.2	45676.6	53206.8	141627	56805.6	33446.9	129207	57263.2	38282	49886.8	41041.6	46341.7	94617.3	54915.9	50471	67617.4	55660.4	49843.6	42853.2	44383.9	51423.1	45962.6	66503.3	54959.4	55502.4	72618.9	50693.2	56812.1
179.107	3.224	[M+H]+	5-Phenylvaleric Acid	C11H14O2	4295.77	4200.8	3915.98	5707.47	3691.28	5000.65	5829.72	4518.36	4399.16	4051.07	3251.43	2722.78	3728.68	3294.63	5015.92	3269.8	3332.18	1655.5	4788.19	3230.3	4739.81	4878.84	2736.44	1721.38	3143.84	4093.31	2494.78	1940.39	3116.67	4943.97	1574.89	4526.63	6324.03	3612.34	3643.34	4244.54	4989.02	2963.28	4459.31	6038.95	4836.61	4025.26	5713.45	3909.53	4104.06
160.133	13.829	[M+H]+	8-Aminooctanoic acid	C8H17NO2	32652998	33055538	32638998	33029904	32910624	31494318	36356304	33812612	32901402	36529980	61180564	31043248	29656784	18112854	38159232	25454110	38667948	19268638	32522474	35885560	19419914	14462045	25982822	25012986	19796306	32864466	38375620	12658315	39939336	13150508	26920858	37285240	15496097	23974792	25220486	56778916	34271548	18980686	10630085	36903668	38707508	17689882	18101584	14561384	20901774
173.009	13.165	[M-H]-	aconitate	C6H6O6	1.66849e+06	1.9546e+06	1.67553e+06	1842288	1.99051e+06	2.01755e+06	1.99026e+06	2.24625e+06	714765050	1072225500	481518150	373665275	718584550	186899862	728542250	461767250	1003543200	802272600	638008750	671669850	670254350	585122750	544810450	802702250	568762950	1048047800	446186200	302930875	673313550	568188000	580897050	350592075	850326900	901633700	443137350	450906000	772163550	419884600	162765688	594545550	666973750	544122850	691355050	619292200	476231500
134.047	7.545	[M-H]-	adenine	C5H5N5	93100.7	99647.5	86849.6	102730	113331	106179	107820	107101	13585152	4672632	3608558	1746139	6240722	2318621	14634620	32243881	16938364	64324781	49158597	7243562	609112	24923517	6153348	2183704	32732697	5320627	17679077	15401866	51994784	31781266	19614600	50657978	15255464	19382848	12450256	49376291	2280598	5631442	2036936	4745210	1628107	757517	27105422	38098472	32235819
268.104	7.39	[M+H]+	adenosine	C10H13N5O4	426228	351087	444932	427816	450130	367830	462318	455454	368721	174865	87913.1	52307.9	169961	74191.6	509642	1.12203e+06	615842	2.75779e+06	1.70002e+06	238060	11772.3	678483	240227	64117.4	965208	207648	631529	513316	1558515	1.06109e+06	873092	1.92095e+06	534053	735041	358265	1.40083e+06	38367.1	172193	87725.3	161459	14551.8	8663.82	789778	843735	1.04445e+06
145.014	10.783	[M-H]-	a-ketoglutarate	C5H6O5	198741	262060	261644	296102	319921	329560	318623	326252	41045188	81304481	127695688	35359616	70592344	32396847	34022475	27825491	109611350	82754425	65078538	107328088	164610350	46205828	118722812	83813731	67317756	89538750	18641711	76189075	36172741	49257441	56410300	62236050	42094459	66418112	35923816	48770866	47117047	28957291	29174916	51099559	74714950	61070231	59344075	44696191	42840216
161.092	10.832	[M+H]+	Ala-Ala	C6H12N2O3	108933	88967.7	86180.1	105801	104430	105315	108107	100499	116906	99227.1	266639	70321.7	175483	68156.9	179023	60263.8	108832	138726	313765	516591	59519.4	739468	179180	140427	84478.8	162421	205035	128235	361723	71147.8	87262.8	58692.6	64560.2	701597	284655	74530.6	188528	77241.4	44403.5	210442	299323	70005.9	121336	222458	109290
88.0403	13.011	[M-H]-	alanine	C3H7NO2	4701316	5.32885e+06	4569811	5008563	5172729	5.25271e+06	5.25999e+06	5585266	501234350	677154000	1053464400	547432250	620653950	443273050	470835650	447327550	1093192300	498410000	613111800	976118500	384164775	609548850	550703700	644998650	589683000	632965600	614851350	454360350	462859450	550785550	816317950	909932800	706553350	1172054900	840042700	486769250	534066400	896720900	362466275	951515300	705354150	495602400	900651100	495144150	529336450
157.037	7.742	[M-H]-	allantoin	C4H6N4O3	532939	496747	501293	534248	525516	560882	579330	475592	79983700	61109675	79827550	64639750	81352969	43351253	87164550	75009844	109802888	66040756	99354094	105250750	49225516	99420750	78931119	82411875	77914944	69358481	142367688	47808791	122045950	60091606	47649241	72361850	61486100	78367606	129610275	118424450	96950969	91177425	41909566	164360438	162788650	30954366	109534038	105557412	81200125
132.066	13.018	[M+H]+	Aminolevulinic acid	C5H9NO3	2.06554e+06	1.89108e+06	1.97843e+06	1.92802e+06	1876772	1904458	1969839	1982908	2659462	9869921	1.36378e+06	2.62181e+06	1.73236e+06	934042	2.53854e+06	574456	1.44815e+06	1.58825e+06	2.46309e+06	1.19427e+06	2.31737e+06	5.53075e+06	1.6317e+06	1.76046e+06	3.29651e+06	1.15578e+06	2351749	4095732	740597	2.81785e+06	2.59764e+06	887170	5.9138e+06	3743234	2.84314e+06	1.20072e+06	3.45146e+06	5.44327e+06	987373	2.7036e+06	2966434	1651408	4121034	2766949	5045560
348.07	11.904	[M+H]+	AMP	C10H14N5O7P	25709.5	34501.2	35407	32866.4	33121.9	33841.9	34964.9	31208.1	5015773	5988406	6974060	4207983	4241877	2561270	7246084	4226934	778011	5407375	4857630	7581021	2362793	8452262	4477772	3977704	3918373	3799810	4788296	2186480	8740602	3008044	4919958	2078124	10445768	10325416	6899573	4258183	7109712	3780533	2451526	5496656	7192459	4022088	4155722	5131719	2675713
311.296	2.146	[M-H]-	Arachidic acid	C20H40O2	7.69111e+06	7752424	7.20042e+06	8002602	8.12323e+06	7.9484e+06	7.07023e+06	7.17476e+06	334340475	154743362	108283975	346920075	246293825	190509238	89430281	231096975	70326806	144945012	161310762	227299575	367077500	289421675	368915100	327093875	256674975	98674875	374301075	407738825	257607725	222979175	262393850	331206800	230773800	228760700	357442775	329075925	227697825	359999600	348223400	270083375	402413325	212900500	236652875	626113200	290656125
175.119	18.449	[M+H]+	arginine	C6H14N4O2	4.02338e+06	4.03382e+06	3.91305e+06	3.90278e+06	3.63253e+06	3.44526e+06	3.91665e+06	4213686	4.6369e+06	5467748	5.39779e+06	4077741	3.87019e+06	2764110	5.19225e+06	2984072	4432562	3.22921e+06	4.95028e+06	3456338	5.57838e+06	4.31892e+06	3.64915e+06	2495906	5.18941e+06	3953307	4.01463e+06	3.19663e+06	2.92797e+06	5.0675e+06	5.33972e+06	3.75009e+06	2.67687e+06	5.98079e+06	4.05979e+06	3.46809e+06	4.38801e+06	4.54588e+06	2.76001e+06	4.33714e+06	5393312	4980138	4.30335e+06	4.30096e+06	3.426e+06
133.061	13.843	[M+H]+	asparagine	C4H8N2O3	1629028	1.56374e+06	1.54665e+06	1566673	1.51999e+06	1.6154e+06	1.6535e+06	1.5853e+06	1.70898e+06	2.28224e+06	1.57061e+06	1.70742e+06	1683369	1.1462e+06	1.61937e+06	1.2882e+06	1693818	1773663	1.95249e+06	1.41156e+06	1.99989e+06	1.07625e+06	1.47121e+06	1.04522e+06	1845315	1.61466e+06	2176710	1741266	1.24484e+06	1801737	1.93646e+06	1532493	1.56574e+06	1.61682e+06	1.96062e+06	1.46365e+06	1.65596e+06	1955950	1.08627e+06	2829400	2.16949e+06	1.4385e+06	2.11062e+06	1.71087e+06	1.29627e+06
134.045	13.746	[M+H]+	aspartate	C4H7NO4	76297.7	63241	57002.6	62186.7	61525.8	57329.4	58948.4	51734	62653.7	47327.2	69350.2	60205.6	37385.6	39759.9	45059.8	59411.8	63943.9	61946.4	38516.4	53838.9	30192.5	71548.6	33490.6	49493	41994	50243.2	42236.6	33311.7	42285	39202.9	48450.7	41744.3	40645.6	45224.6	38654.2	129603	62788.4	49755.4	56152.1	55662.9	71003.1	75284.4	66626.4	44005.4	57896.3
90.0554	12.866	[M+H]+	b-alanine	C3H7NO2	18208962	19097410	19000382	16737216	18089566	19079632	18930794	18490248	17277056	21188570	20588264	16701427	20518112	14911501	17540186	14024044	34079100	17001930	12821013	34282644	11827125	19851608	13411196	18943098	17518834	16670295	21115790	13348541	13941597	18752520	19688602	26375978	23453248	6787640	23952904	15902239	14462812	26939302	12330465	31559656	23346088	17244136	28165538	16243616	16424936
123.044	10.275	[M+H]+	Benzoic acid	C7H6O2	39535.1	29190	29072.1	28659.5	21873.5	29895.1	35174.6	23753.5	18625.8	28531.7	26560.8	29130	35102.6	18065.2	16689.5	14908.1	25404.3	15013.5	24715.2	23953.8	37970.6	20698	22294.2	15933	23102.3	35870.1	27215.5	16463.8	23101	24539.7	25046.5	30482.7	17197.7	25001.3	26738.6	22962.2	21478.1	22913.2	21715.9	35908.3	20889	23890.8	25316.2	26046.7	27544.8
118.086	9.879	[M+H]+	betaine	C5H11NO2	81394664	85121560	82660992	85352088	86312288	86600680	83751104	81887624	88386968	99894440	83164064	24313222	91935256	58135068	65109164	29765950	79979256	82782184	65667744	83415160	146224304	70026712	45956436	68917176	98669128	64578420	103310400	86627976	79199960	79625832	77869016	82405920	73296776	147488464	116874168	70688528	105107816	108984536	47421460	112856648	98871464	62399360	95368936	80536072	84188664
585.271	2.068	[M+H]+	Bilirubin	C33H36N4O6	4.22585e+06	4473885	4.55455e+06	4.42461e+06	4.64965e+06	4.2756e+06	3.90206e+06	4130458	141830662	89034519	77213581	220631525	292451325	223135625	37024803	238040325	18907083	159799538	127980575	169811150	170234038	11018573	28360462	388090125	165482050	98834750	352784975	64806006	375287325	251454925	285703075	20362798	33457872	106822312	3419749	4764729	113198888	155335688	216581125	310538175	29234903	105334800	171096312	397113800	177571662
200.129	2.615	[M-H]-	Capryloyl glycine	C10H19NO3	169215	148636	322296	263411	170262	134306	168988	156542	36601647	35244172	32904753	39829175	49981766	15201039	31542728	5313010	40428328	28548816	35201172	40010409	55184950	10871480	23657183	89068006	17631988	54384838	100049856	15332158	22322842	28975141	27148431	46031666	55564944	17066483	9325210	19273625	14034803	81918300	15310175	19914425	36635397	180913700	136566362	122698288	58796206
162.112	13.199	[M+H]+	carnitine	C7H15NO3	247161280	287532192	238434608	263746608	271849152	238644752	254661104	247660496	227025808	290516640	305491424	317384512	210097680	129209512	217262800	204036224	215294848	196715824	204006896	204915888	118476056	250604736	280234144	193994384	244300928	178868048	263863440	198600640	234168656	241507456	217720448	193225200	163340704	205374032	195410192	245110000	272824256	238354176	94171816	284326624	283358816	200330160	294961536	191090496	222779584
225.099	14.208	[M-H]-	Carnosine	C9H14N4O3	1200.59	855.25	2682.23	1929.99	1695	1761.85	1920.02	1617.66	457040	1126080	1080979	452587	661265	221969	544294	154434	743592	229481	592928	303110	340941	781748	313928	173798	603023	226116	285037	361743	272284	300433	533410	45240	265097	805411	395601	535252	804899	348770	433318	523575	614065	229020	452460	1837134	247244
343.124	13.742	[M+H]+	Cellobiose	C12H22O11	120330	124447	124064	120418	125605	117592	126940	135608	6845398	14780244	30790900	5334058	9734110	5827111	23072770	6346877	27774659	13753764	12010369	44890675	5797004	21248188	10907906	11914610	4867967	17242327	9144184	2510117	66969481	9851090	4874089	4965367	23605508	16548050	15977530	3940792	17873730	5649457	3079272	30873928	11831278	161645962	4658421	4886940	6724669
407.281	7.171	[M-H]-	Cholic acid	C24H40O5	289636	315991	259810	297437	262687	316864	258938	293078	1663626	7357495	3017840	2088961	457329	11054290	14572095	1702000	3276433	2053204	33830197	4042517	117436288	2865170	35840066	919992	22092000	90437869	2453827	4093324	7250181	330713925	3192672	3177013	590690	2847722	14604152	261962	2783985	7131585	4412849	4415979	107076938	6070248	3719988	2674132	257337
104.107	15.016	[M+H]+	Choline	C5H13NO	96838528	100596680	106662456	105354104	103452568	101518600	107302120	105634968	163764976	163319984	215920464	150823664	167542160	103371872	125172544	107834136	144947728	132027480	152814064	149859152	197180672	153157168	134142176	121948600	95349976	224463488	180470448	110355264	158750512	173837744	181573136	121886616	122467080	224491344	170050544	126769536	120338976	171120160	114102976	176391616	150229808	67708792	147728768	139322384	113476184
129.02	13.188	[M-H]-	Citraconic acid	C5H6O4	522524	622754	536943	586630	643368	648236	780110	763511	228982525	368409400	200469988	151473550	189745688	58931819	238497500	148186238	323295700	270042725	170852338	175797338	226109525	191931062	173503062	265325625	182378062	328226725	124320400	102231244	211020300	177804450	178172962	110111188	236808200	290832225	169562962	148984700	193997250	135082750	53564575	272426925	255424900	164715162	232597775	201976500	165591138
191.02	13.719	[M-H]-	citrate/isocitrate	C6H8O7	224415	247102	291237	328479	355407	362915	405615	391595	456406100	349582725	119122362	79325275	242458025	25724992	73517400	286980100	377863975	496235550	274353175	198472012	1405983200	405278600	213897475	227116325	220489275	503513000	49382153	55668681	186243612	283499125	303807400	153058012	55055881	468270550	61970212	87538269	242809200	45838838	16527039	78234431	57076619	198523412	279062375	312075800	33915838
176.103	13.745	[M+H]+	citrulline	C6H13N3O3	10512910	9876568	10034227	10187109	10460589	10199595	10437047	10350116	14431829	17730758	19322946	14484327	13634876	8.25359e+06	19243856	8549509	11634896	13362624	17148136	13634411	23669750	16166203	15036752	11641187	14499457	15364701	12093321	13749651	12013625	19750206	19669568	18636958	4823562	25619062	16990970	14627771	13415372	16201199	4540225	14441056	17144790	11826597	13813533	15268987	15801205
132.077	12.943	[M+H]+	creatine	C4H9N3O2	52285740	51041684	53705548	52523868	47069292	45896768	49812112	52015296	23466384	22285148	103921544	25598672	17150114	20944738	15521221	39251748	25445648	14107515	34751776	30566334	20956826	29687482	28740758	34201584	37059068	21350438	23142746	29568504	29545232	11182327	99721288	20079142	15459621	166888528	23169760	27743616	48846224	22276778	18373120	25999586	39226640	42527172	38281396	38102368	25389714
114.066	7.388	[M+H]+	Creatinine	C4H7N3O	378770592	372113280	329412736	355420544	362977184	428241568	414966880	371635552	468508416	540742144	597928448	484951168	461606496	453789952	554301824	424593408	529613664	410920832	488921696	517006848	413785952	671046144	459591840	444024032	458996128	347128704	477096160	401227136	612197376	405607776	396549120	412132352	479351264	631110336	663233536	572158912	594795456	417306528	386222688	624462144	598859200	393351520	476641664	638175872	459017216
330.059	8.772	[M+H]+	cyclic-AMP	C10H12N5O6P	13943.3	25058.6	24849.7	36517.3	35752.6	26539.2	57340.9	44152.7	4792679	6519501	3721381	9864307	6559941	4881816	3913471	5771930	692755	3934881	4604243	7291173	1880125	15002259	3504021	9556593	8077521	8551296	7376198	5609953	16918375	5523048	5773758	3050488	16438795	10814851	7336219	9900181	6478729	4559903	7136454	10615841	7120070	4140430	9607824	9334865	5207227
223.074	15.063	[M+H]+	cystathionine	C7H14N2O4S	16435	15408.7	15486.1	13655.9	7748.49	16502.8	14155.5	11826.3	4413.48	3961.34	38208.2	3181.34	3897.33	2694.84	8744.6	1479.61	1787.31	3111.88	4730.98	12106.8	0	20749.7	2861.42	7925.65	3231.6	0	11256.9	3208.27	10198.2	0	0	6559.3	10687.2	17283.3	24588.8	3283.62	8571.33	5564	8158.8	1371.77	10243.7	0	2477.53	4280.5	2880.51
199.969	8.6	[M-H]-	Cysteine S-sulfate	C3H7NO5S2	19873.4	23048.2	31359.7	41992.5	31524.7	35206.3	29838.8	32239.1	3292823	3899729	2134368	3404073	2161345	3901933	4561429	2344811	3490023	3898935	4906898	7126326	4431456	3321037	2465254	1941347	3327932	3407765	1860200	2118978	3696632	2923607	2820923	2782691	4623721	4875141	8552391	4121747	5730603	3004711	1340244	2583331	1502379	940289	2706565	2907262	1885733
427.096	13.675	[M+H]+	Cysteine-glutathione disulphide	ï¿½C13H22N4O8S2	48482.8	30251.7	24752.6	24059.7	26070.1	27389.5	25125.1	30305.3	6113903	3934273	1205463	1815913	6063002	2081197	2065789	3825967	3563028	2358913	4676770	5465623	1170522	12755309	5012017	5005496	3258367	2159846	5896615	668982	4746188	3440518	2780888	3536355	3128448	4300724	3369474	20063512	2014359	3626921	1136689	2648453	1137634	1096542	8895149	1957488	3992701
244.093	8.726	[M+H]+	cytidine	C9H13N3O5	23630.7	19137.1	18795.5	19648.6	24822.9	21953.2	25925.5	21591.8	26820.5	38499.8	48862.5	16101.6	21173	21474.4	30630.3	37484.6	66659.9	28532.3	41754	34626.7	20970.9	161691	19297.9	18608.9	23168.8	13058.6	20836.7	19890.9	59053.1	13196.8	28191.8	9054.26	35475	36912.9	62573.5	42399.1	19427.4	17732.4	16669.3	35247.6	54665.1	8288.73	27825	42848.6	13064.1
112.051	7.757	[M+H]+	cytosine	C4H5N3O	138652	142082	146646	136344	149701	148161	141965	147430	180374	562760	648759	251875	214337	129615	259991	438695	185783	289140	264443	119184	205753	809466	244641	199141	205103	161376	266630	193344	323025	215070	351564	84613.2	118196	553704	358712	239786	171136	252120	70402.6	348557	598732	237088	180253	243682	192724
104.071	11.818	[M+H]+	D-2-Aminobutyric acid	C4H9NO2	2.88956e+06	2.96696e+06	2978758	2.75628e+06	2.85024e+06	2.82444e+06	2.89411e+06	2.83873e+06	1.57834e+06	4536538	1.66747e+06	2.04487e+06	1.66046e+06	1.48542e+06	2.1396e+06	1.76431e+06	2.08881e+06	1.85606e+06	2.05597e+06	1.93907e+06	2.08713e+06	1.75105e+06	2.82862e+06	2315696	1.75579e+06	1.54994e+06	1.38947e+06	3.23268e+06	1.48769e+06	1.23186e+06	1.63163e+06	2419341	1.36358e+06	3.66097e+06	3.01452e+06	1745203	3673428	2.95608e+06	1.21991e+06	1.02136e+06	1.05129e+06	1.63144e+06	1311129	2957478	1540187
151.061	9.661	[M-H]-	D-Arabitol	C5H12O5	477507	463990	478335	477041	494034	494859	486667	506062	72564075	134851850	304981100	89498256	102097750	43589300	109041762	54349069	84485644	76733581	93600644	122559250	58443581	166143912	67608600	82860431	70215969	82446194	95319669	76062031	115236038	80008731	70523756	66306712	73529200	152119062	115244088	79001869	116675738	59331125	47014384	154222212	181159500	58814481	91529200	76334131	47064066
268.104	7.39	[M+H]+	deoxyguanosine	C10H13N5O4	426228	351087	444932	427816	450130	367830	462318	455454	368721	174865	87913.1	52307.9	169961	74191.6	509642	1.12203e+06	615842	2.75779e+06	1.70002e+06	238060	11772.3	678483	240227	64117.4	965208	207648	631529	513316	1558515	1.06109e+06	873092	1.92095e+06	534053	735041	358265	1.40083e+06	38367.1	172193	87725.3	161459	14551.8	8663.82	789778	843735	1.04445e+06
688.156	9.854	[M+H]+	dephospho-CoA	C21H35N7O13P2S	687.3	1437.19	1097.57	1248.82	850.77	1178.52	1325.16	1099.67	32198	126573	15431	111903	79392	0	13512	0	0	131102	106643	167719	0	16517	0	306455	0	0	157495	0	40364	71663	10357	0	0	0	0	13479	0	0	12336	0	0	0	13283	0	0
259.022	13.728	[M-H]-	D-Fructose-6-phosphate	C6H13O9P	3291.11	5028.89	4371.31	4718.61	5275.38	4436.19	4340.66	5311.18	810577	748235	1924993	313459	309453	235255	566125	907875	1503635	571105	394111	761155	309330	3510414	220271	717296	628461	489543	471556	378801	1319633	456976	260139	484297	432799	393120	473927	5617637	1224029	391600	222783	658663	1422728	484874	1265299	372909	434345
348.07	13.53	[M+H]+	dGMP	C10H14N5O7P	3457.23	3286.08	3089.22	3008.46	2707.72	2982.18	2753.62	3427.49	222767	1055	0	26745	24410	9541	80267	263594	212269	1417084	649080	0	0	201320	0	0	152886	0	0	6986	2533455	360808	87072	368673	23178	176784	177271	3532825	0	56783	19982	17999	0	0	196122	0	169239
191.102	13.369	[M+H]+	Diaminopimelic Acid	C7H14N2O4	89717	87021.1	98241.2	86866.3	91936.5	109894	102828	95007.8	97263	313994	94190.8	85142.8	289530	69974.9	115781	143534	117632	135578	126507	125324	53528.2	157817	122929	89175.1	75084.3	96381.5	89278	78101	94540.6	69609.9	117749	62374.5	331051	220692	196666	73573	127697	80468.4	45138.9	155584	123524	69951.7	100867	60467.2	113972
106.087	11.634	[M+H]+	Diethanolamine	C4H11NO2ï¿½	5.08444e+06	4.98791e+06	5037011	4.7461e+06	4.6625e+06	4635820	4.44171e+06	4.4076e+06	6.96171e+06	9177411	10891400	6489026	6.804e+06	3633517	13308151	6.22826e+06	10182765	11466859	11044480	12121717	4.33734e+06	10696903	6.65391e+06	8422510	6250580	7849190	7156980	4716978	9375565	6.68587e+06	6.246e+06	3.19851e+06	16343557	12426140	12217684	5902276	7.00387e+06	6.73371e+06	2.80028e+06	6.98363e+06	15269111	2.72629e+06	5041190	7.89661e+06	7.51034e+06
131.035	8.661	[M-H]-	Dimethylmalonic acid	C5H8O4	435292	447256	547746	729498	686830	701826	447113	538658	85636544	117932900	70833694	69439525	118568012	37978303	343993275	125667138	208585100	349737375	163304200	132393988	64653969	108574288	58822169	111908700	82192650	85222419	54951700	72637700	74916156	111929100	114237162	63000206	122309100	118700188	66776675	186416700	71138875	29833100	38047325	84949306	84860569	42144309	70452675	117909838	66603250
183.03	1.906	[M-H]-	DL -3-4-Dihydroxymandelic acid	C8H8O5	133788	142826	156687	137282	141510	128549	132647	134679	11074366	50380903	57931075	10524576	73143425	41995900	24975186	19254480	5279809	7676342	16211683	68249325	44008275	61876544	18871327	73754619	2763893	27619050	19860289	52861731	70738769	25794986	10610021	38036091	29400116	43393425	9755810	14539936	19425433	34252312	55975256	14032244	10421904	53376331	21388108	35705441	30255838
160.133	8.318	[M+H]+	DL-2-Aminooctanoic acid	C8H17NO2	441802	409834	449543	478203	487934	492075	446589	476898	1055675	751699	1.81072e+06	846898	1.04447e+06	372314	1.01854e+06	647463	810320	559508	794761	770746	341444	1.55781e+06	1.01873e+06	692519	876554	14924759	1.33275e+06	298648	954394	786503	826642	997730	1.05791e+06	1.19612e+06	1.04941e+06	694034	764896	689699	313641	1.64619e+06	1.42517e+06	373197	937885	513154	869754
149.045	10.516	[M-H]-	DL-Arabinose	C5H10O5	1.37801e+06	1.48182e+06	1.85064e+06	1.88994e+06	2.08191e+06	1.89615e+06	1.92392e+06	1.96378e+06	391769900	693902000	948279200	469269600	362736625	233903075	741973650	269054300	612223350	1200235200	617125150	647952400	244042625	771317450	426366950	506048100	561223950	473763150	471358050	231746575	514196350	509058550	409267275	168896962	710170400	738337450	696578600	588890450	790211050	296370125	120105750	669318000	1243396300	399037375	320019475	450957250	317239800
204.066	2.615	[M-H]-	DL-Indole-3-lactic acid	C11H11NO3	1.74822e+06	2.08358e+06	2.15462e+06	2.23971e+06	2.2931e+06	2274524	1906614	1.8172e+06	321265825	301412100	2708929000	264794475	361205800	244896575	573854450	375037300	346276775	244700775	317281425	146627088	391977600	321783875	452127750	244452175	215612075	263626550	257610100	476430850	253440375	281873000	482119950	432937400	169511562	432081700	240075075	258604625	367496025	345799925	392511025	181755338	802601200	478688950	370896775	497278950	586524950
130.086	11.026	[M+H]+	DL-Pipecolic acid	C6H11NO2	3658058	3.65797e+06	3419413	3528400	3550876	3.5735e+06	3.51967e+06	3679340	604426	1.42339e+06	1.36841e+06	799431	1.05582e+06	1587045	1.38734e+06	1.35978e+06	1.04173e+06	913085	1.25617e+06	788980	1.11949e+06	1.54109e+06	951790	881792	2.52597e+06	543891	691154	1.43958e+06	483105	1.04642e+06	2.21718e+06	1.01932e+06	1.75919e+06	1.81177e+06	1.50682e+06	972897	1.53529e+06	5.57868e+06	519735	1.62445e+06	1.91762e+06	1030567	1.29415e+06	1.54363e+06	734841
167.07	2.476	[M+H]+	D-Phenyllactic acid	C9H10O3	4146.77	4894.68	5613.99	5410.24	4754.39	5644.42	4837.94	8252.02	5524.94	15409.3	3797.91	4019.12	8817.07	3309.44	8783.12	2120.58	16940.2	10711.7	6116.62	4965.79	13983.2	6179.36	3950.96	6698.44	7452.87	5230.72	1391.19	4361.59	5742.76	4441.1	4274.01	8278.46	6562.67	5566.03	4995.29	5764.45	1465.4	5341.32	7011.95	8926.97	23080.5	4977.66	2859.19	3361.62	13735.1
786.166	12.108	[M+H]+	FAD	C27H33N9O15P2	5902.8	6700.7	5718.33	6533.11	6367.18	6300.25	7127.68	7292.09	431491	150982	52203	512103	325481	496166	97107	757280	86834	475342	344625	740146	288733	300647	17352	629665	359407	316076	580318	493808	425843	372791	533633	310649	208021	248395	341027	80779	109836	517220	233367	429405	174602	146787	388773	724357	436583
474.173	12.757	[M+H]+	Folinic acid	C20H23N7O7	2004.64	3048.72	2682.19	2396.51	2996.3	2918.82	2981.28	2319.38	322657	184477	175526	250594	331506	233294	276563	242136	113099	164342	378197	514792	1059835	548490	154892	577326	247205	276994	1096572	142369	1119449	254750	914065	191188	200136	431334	825455	216958	601665	335870	56604	890775	611848	185034	316486	342012	307740
115.004	11.072	[M-H]-	fumarate	C4H4O4	55993	56369.1	59222.1	62327.3	66948.2	66734.2	73314	71865.2	8034062	29192391	26434644	9179310	20561256	9554491	6950116	6772601	20696856	19564405	19988458	18288944	28233472	7402235	22392719	26711641	11026201	17377167	4440614	11265584	6171969	11641402	8734084	13480586	12148419	15667186	7589001	6520004	7473837	6511028	6290867	12010891	27764334	15123088	10114485	9476990	11075500
179.056	11.579	[M-H]-	Galactose	C6H12O6	28540634	26535578	29148818	28551856	28985230	31636686	30099768	31795088	3897105200	3975122000	3841294000	3862242000	3138775000	3678977200	3952124400	3571706000	4128824000	4493435200	3965616800	3988674000	3989447200	4152670000	4234070800	2941269800	5673220400	3498733200	3251423000	3070567200	5835580800	4218413200	3609189200	4591305600	3464889200	3431894000	3538374000	3485366400	4725908400	3674615600	3680730000	4280639600	3838974400	5894508400	3793343200	3004118400	3371919200
193.035	12.763	[M-H]-	Galacturonic acid	C6H10O7	783109	875983	846398	962694	870836	942891	1.10789e+06	1.03334e+06	165236950	177584450	401021425	79832869	69421519	66061306	283498525	74986681	136738700	241353000	191828038	359524675	46157741	356945625	101515169	138315688	93466000	183525262	80023344	101220769	249333875	73543969	144266600	40819497	340022075	426704250	462647300	87814050	255511525	101414181	139086525	178324238	267497325	109829312	88601050	142573300	39915641
146.117	13.677	[M+H]+	gamma-Butyrobetaine	C7H15NO2	38080400	38374116	35792764	38649824	38212788	34962204	38457600	37152108	46500180	65633632	58717204	43852716	39280060	20761638	51385120	24142992	64214412	28182070	44585028	37677060	41554212	41034292	49966732	37074740	57131244	21241988	27727296	34676352	37365296	49229952	38033720	32689552	33065238	50840196	50040340	52298092	46310572	53281344	14133800	50432172	64100960	36443732	58187884	45226172	26514170
179.056	11.579	[M-H]-	Glucose	C6H12O6	28540634	26535578	29148818	28551856	28985230	31636686	30099768	31795088	3897105200	3975122000	3841294000	3862242000	3138775000	3678977200	3952124400	3571706000	4128824000	4493435200	3965616800	3988674000	3989447200	4152670000	4234070800	2941269800	5673220400	3498733200	3251423000	3070567200	5835580800	4218413200	3609189200	4591305600	3464889200	3431894000	3538374000	3485366400	4725908400	3674615600	3680730000	4280639600	3838974400	5894508400	3793343200	3004118400	3371919200
259.022	13.728	[M-H]-	glucose-1-phosphate	C6H13O9P	3291.11	5028.89	4371.31	4718.61	5275.38	4436.19	4340.66	5311.18	810577	748235	1924993	313459	309453	235255	566125	907875	1503635	571105	394111	761155	309330	3510414	220271	717296	628461	489543	471556	378801	1319633	456976	260139	484297	432799	393120	473927	5617637	1224029	391600	222783	658663	1422728	484874	1265299	372909	434345
129.02	13.188	[M-H]-	Glutaconic acid	C5H6O4	522524	622754	536943	586630	643368	648236	780110	763511	228982525	368409400	200469988	151473550	189745688	58931819	238497500	148186238	323295700	270042725	170852338	175797338	226109525	191931062	173503062	265325625	182378062	328226725	124320400	102231244	211020300	177804450	178172962	110111188	236808200	290832225	169562962	148984700	193997250	135082750	53564575	272426925	255424900	164715162	232597775	201976500	165591138
148.06	13.004	[M+H]+	glutamate	C5H9NO4	3178176	3472402	3.57361e+06	3.71508e+06	3.57685e+06	3.47293e+06	3.63207e+06	3.80733e+06	3669374	1953558	3711236	3.6981e+06	3.47641e+06	4628588	2.44864e+06	1.67268e+06	2.75456e+06	4347100	3.10834e+06	7.29369e+06	1.88621e+06	2.25786e+06	1.22301e+06	1857101	3.70048e+06	4.74368e+06	2407670	2.26191e+06	6448816	1902526	3.03817e+06	5.06815e+06	4.66103e+06	2451717	3.56423e+06	5188583	3.06122e+06	5.54692e+06	7.58602e+06	3.479e+06	4.29803e+06	3.71302e+06	4.65509e+06	2.72991e+06	2370085
147.076	13.435	[M+H]+	glutamine	C5H10N2O3	82924472	75856968	79888456	75841688	74027960	74003272	73747952	70626384	87621992	98840768	78736968	72306336	92349208	70389544	100118944	62330508	86169000	89332392	97669352	96684072	105088352	79933832	92159272	67992744	88334568	93048584	82244728	98368192	62231324	98898264	97218688	73968248	78004512	75945080	70399744	66945068	89139608	99669704	53146332	90531560	86287584	92595928	84296488	86237416	64295772
131.035	11.637	[M-H]-	Glutaric acid	C5H8O4	1.02704e+06	1.11268e+06	1.06461e+06	1.08871e+06	1.11853e+06	1.12522e+06	1.17613e+06	1.13718e+06	139891450	186846950	154545250	141592462	116158812	133870250	141211662	119418062	139851862	168177150	141093638	193304888	175699138	146955350	156122062	230674375	202636838	118002762	117308712	106331838	209401662	148993038	149080438	172869400	130334950	148381388	128341688	123411412	179236588	134632488	134198350	155011462	130919988	245762025	132874750	118378488	122172650
613.161	13.655	[M+H]+	glutathione disulfide	C20H32N6O12S2	3495.39	1266.2	1409.95	1007.36	194.81	978.26	706.21	0	123010	33574	0	39693	0	102821	0	244813	0	76262	0	25329	0	549654	20072	178635	37344	32053	107935	103756	112830	14632	34257	16426	0	12712	1964077	0	47336	40795	0	48304	0	0	395600	66426	61749
105.019	10.446	[M-H]-	glycerate	C3H6O4	205798	250279	282904	331946	344813	325624	345358	360324	50266916	70800744	69977050	61192731	44992025	21740112	47452834	36811750	57878519	52271891	61896562	41886134	48637609	52940219	50761891	31675203	33583112	59294300	35293347	38065416	50643700	55370456	48214141	52928362	47186575	52478731	46422500	50311225	45174522	34223878	26803594	69424044	57651919	66123431	59458794	37972634	46474559
258.11	13.68	[M+H]+	Glycerophosphocholine	C8H20NO6P	884272	972150	903108	1.02097e+06	1.01256e+06	954437	928742	1.00184e+06	1.65206e+06	1.18787e+06	2.76336e+06	814710	940285	699889	1.02836e+06	978258	1.73406e+06	1.38359e+06	973480	1.19369e+06	627399	1.44714e+06	894321	815177	1.50952e+06	1.32861e+06	811236	911026	862663	1.45688e+06	1.06407e+06	1.27147e+06	704235	651345	691401	1.83868e+06	1.65759e+06	1.28072e+06	999968	1.22091e+06	1.62021e+06	1.761e+06	1.75112e+06	797997	1.15605e+06
74.0247	13.36	[M-H]-	glycine	C2H5NO2	878851	916729	921164	974312	982094	919482	958624	1.03427e+06	174381688	177440438	126977012	125323312	190510300	89159931	105617562	73308719	132225462	177444462	131358100	139648500	147790900	117602188	166835138	80397375	137550562	180772562	146376962	185062912	81465356	204369162	452543100	128133900	151338500	137264550	173997200	98850719	145889862	148175362	69922856	226989625	155070362	143042900	193316450	153548038	163873812
466.317	7.072	[M+H]+	Glycocholic acid	C26H43NO6	320651	325414	364505	319280	315755	367932	339054	361282	8568255	19251633	40850512	6293131	16100680	13420345	11461738	3615186	8610936	10084785	27733309	189775062	767760050	8128791	31695109	1956904	15366292	25130502	10181138	9731404	14115356	37041097	25530217	12175431	5076474	9516462	13129008	13814438	33295778	15557706	19408895	150068462	46537722	779168600	27473578	17947780	18727970
450.321	2.721	[M+H]+	Glycodeoxycholic acid	C26H43NO5	216302	185709	171527	138921	153383	132164	214244	134112	1223718	9157006	3741604	1615907	493813	20127306	911809	4229175	1908007	11999591	7544961	36257884	266985675	2608301	12239288	627798	10054634	17386311	5340841	973381	9034762	52629819	4980369	736381	2986218	10442616	5114218	17047255	11627050	10995206	36444809	64271781	17224673	72943231	29423941	6649161	2516840
75.0088	8.558	[M-H]-	Glycolic acid	C2H4O3	111871	135850	169286	169024	190983	188211	148092	176851	27136834	37371609	47695703	28798259	25519370	16962752	20498238	18908605	27461744	30634156	36586100	38935688	16364756	45400500	26020245	26247766	19369650	26707753	19849308	19750511	34107353	23223883	26235012	15898867	57688419	51580372	41687162	24999708	31775472	17528869	12105320	39227888	39012625	18070533	30349950	23826945	21014219
448.308	2.746	[M-H]-	Glycoursodeoxycholic acid	C26H43NO5	328007	280240	312277	291007	252749	196641	248328	247005	8169316	20981995	14073161	7803635	6337458	22779911	2111674	8808960	28107066	44833216	21487573	76740169	755603450	6593379	15698405	2959906	19881480	47631200	11436160	6340233	10528946	87263000	8814365	10965745	11751056	16131691	1495216	36499191	16456217	19792411	39355453	85215881	21714789	173470538	53548319	15821609	14004802
173.092	12.761	[M+H]+	Glycyl-L-proline	C7H12N2O3	73755.7	65920.2	65125.4	59645.6	67378.7	76998.6	47161.5	73368.1	68196.1	294523	61420.3	109618	113713	108223	65338.9	49586.7	86766.1	97855.4	135730	70153.1	96370.7	75014.3	75997.2	103473	154113	119576	107088	203763	96544	76068.4	127973	120337	83276.6	94374.9	139984	81686	153483	84664	22655.5	211724	123939	32487.7	172075	86212.8	161125
72.9931	10.472	[M-H]-	Glyoxylic acid	C2H2O3	14997.9	16980.7	16135	13818.8	18555.8	14187.5	18772.3	14853.4	1970211	4553636	7458700	5599970	1881338	1413970	3762838	1777683	3596746	2367751	3639764	2844930	2379177	4024541	2724378	2572539	1976531	4167373	1822252	1605714	3699920	2744272	3168115	1460465	2700488	4005250	2393348	2739394	3724510	1798886	1557781	4158957	3400425	2594194	2336374	3562952	1608735
362.051	13.258	[M-H]-	GMP	C10H14N5O8P	9125.34	6280.59	9488.55	8132.64	6737.78	7336.23	8831.29	8939.81	247554	143484	0	446693	258453	278266	125371	204593	332005	397269	0	88968	190640	0	720526	159958	121989	0	503393	326861	407071	498516	172304	574250	0	0	224255	0	161451	154246	185761	746567	164726	401541	674563	0	356554
125.06	2.811	[M+H]+	Guaiacol	C7H8O2	93139.5	98855.3	94722.1	108489	104823	88569.1	110310	112054	6368.03	10782.8	4714.23	5694.81	12564.1	13287.9	130299	4193.76	11596	8731.04	2570.19	3812.02	187991	18045.8	212079	13469.1	6747.79	224192	11917.9	6468.52	18452.4	22971	3401.78	1917809	113936	147449	7304.83	430382	8725.77	544924	9591.98	1.23683e+06	19179	6282.98	796531	5664.43	349638
118.061	13.055	[M+H]+	Guanidoacetic acid	C3H7N3O2	945170	988571	1.03355e+06	1.00004e+06	930298	956250	979288	1013453	1202809	2.15149e+06	922872	936855	721284	510844	1432833	527505	1.18384e+06	809098	1.15423e+06	939484	1.86511e+06	1.49091e+06	1.22924e+06	1.13806e+06	2.00072e+06	816236	1.22144e+06	1.01491e+06	982677	1185603	1.40811e+06	608571	867278	1.51565e+06	1.43452e+06	1.07107e+06	867341	1.42171e+06	395105	1607449	2282489	952920	2133577	1.66728e+06	898223
152.057	8.228	[M+H]+	guanine	C5H5N5O	11942.1	14104.5	14306.8	16990.8	19816.4	19434.6	15207	14267.8	33897.1	13907.4	14412.7	7632.45	12256.9	2476.08	19331.7	19720.9	29103.2	37244.6	11077.8	30608	3939.7	65987.6	5429.92	15086.5	8515.24	17701.5	9879.34	6994.77	37415.3	18646.1	31730.5	37087.5	26928.4	11511.2	12719.4	67189.7	21380.2	15259.2	16064.5	1574.38	1458.94	0	65183.6	27473	40809.6
284.098	9.08	[M+H]+	guanosine	C10H13N5O5	118827	152379	140983	141577	154432	154916	134626	137761	106340	143974	215472	93189.1	118458	116122	151708	357560	147285	506805	392195	127861	55421.2	131921	165493	115817	229273	145092	141506	157929	201647	234474	213419	238245	174158	169464	65658.3	153017	110944	68689.2	139437	139088	29208.3	88510.4	171484	223369	265807
156.077	13.985	[M+H]+	histidine	C6H9N3O2	7415.41	33747.9	38844.5	40729.2	38372.8	35101	43982.8	36889.9	19475.2	50633.3	46935.4	15876	19390.6	19252	51368.8	20560.3	24876.4	12661.3	42188.9	21376	10295.8	403318	30959	20351	24374.5	22782.4	10230.6	16327.3	22917.8	9753.51	19670.3	34078.8	52975	58674.2	314799	25397	59932.5	17562.9	13784.4	287169	141538	33573.8	19714.7	48424.9	11160.7
241.129	13.951	[M+H]+	Homocarnosine	C10H16N4O3	44902.1	48854.6	37020.4	45039.1	47624.9	48892.7	52502.7	43022.5	78309.1	171801	1.16199e+06	71209.8	49154.5	19844.1	25540.8	10689.4	25642.5	65055.2	87931.4	44085.8	276301	71323.2	35239.1	19235.6	252000	18370.7	15362.6	655912	142488	26475.7	63226.6	18078.6	44263.3	72701	27921.5	58968.4	221749	22637.5	24474.4	592859	40632.1	10504.5	191590	431728	153663
190.119	13.551	[M+H]+	Homocitrulline	C7H15N3O3	396688	411096	409089	387995	407453	424099	405892	432910	567566	552771	1.77078e+06	673786	869839	545608	729956	979673	713569	403282	484408	779834	299713	734902	711989	565411	376950	355949	691670	205179	863411	728723	581927	342345	534172	456910	880174	764585	928919	558983	160250	856469	511801	360941	568075	773084	496356
136.043	10.778	[M+H]+	homocysteine	C4H9NO2S	159942	130044	124277	133207	138784	130799	137420	132433	113344	145990	103160	120741	115204	80125	205778	103061	124159	169831	144782	112106	93399.1	163150	128022	90383.5	159736	192731	132849	120632	119814	161359	324577	95866.1	307279	335721	182502	68058.2	261789	164418	43418	130913	149429	76911.7	131529	94387	65352.7
169.049	3.075	[M+H]+	Homogentisic acid	C8H8O4	15728.4	14471.3	13834.9	9786.11	15979.6	12097.3	14478.7	13961.3	23937.2	27577.4	51514.3	19767.3	39266.1	16212.7	22959.5	18074.2	50417.1	24448.2	32792.8	21176.6	15876.4	23554.2	34184.1	21593	19971.5	21906.8	12429.6	17769.3	17957.8	26047	11312.8	43231	21423.9	21139.4	14981.2	24949.1	23403.7	9210.49	6686.67	15915	37771.5	30318.8	26529.2	15789.4	22314.7
120.066	13.173	[M+H]+	homoserine	C4H9NO3	5.60867e+06	5.78686e+06	4.85816e+06	5.25136e+06	5.01043e+06	4928326	4.94056e+06	4.71264e+06	5348949	5.52378e+06	8839759	5.42569e+06	5.78853e+06	4.54961e+06	4.99206e+06	3907222	3.7357e+06	3.75378e+06	5.33885e+06	3.76452e+06	8.04463e+06	5.61746e+06	4.10122e+06	3.81121e+06	7.64767e+06	5.7326e+06	6.05991e+06	5841200	4029740	5.29215e+06	5038604	4.0252e+06	2.55188e+06	4287425	6.76477e+06	3523280	4.47255e+06	6594052	2766693	5.7903e+06	7695388	3.5126e+06	5.28266e+06	5511996	4652992
181.051	2.764	[M-H]-	Hydroxyphenyllactic acid	C9H10O4	248559	230393	156025	167013	215176	178459	213728	148352	16399992	223782300	59930856	16383892	14700542	10535963	44480291	19035531	449726450	30172747	26822822	77615669	44080425	53433919	52061150	83341519	7768087	19196020	11323284	67871694	23685305	16242733	115963050	15587511	48245600	59940744	50263966	8334350	24158305	18608462	15114377	19233014	38034591	28815828	29899156	39820053	31206684
132.066	13.018	[M+H]+	hydroxyproline	C5H9NO3	2.06554e+06	1.89108e+06	1.97843e+06	1.92802e+06	1876772	1904458	1969839	1982908	2659462	9869921	1.36378e+06	2.62181e+06	1.73236e+06	934042	2.53854e+06	574456	1.44815e+06	1.58825e+06	2.46309e+06	1.19427e+06	2.31737e+06	5.53075e+06	1.6317e+06	1.76046e+06	3.29651e+06	1.15578e+06	2351749	4095732	740597	2.81785e+06	2.59764e+06	887170	5.9138e+06	3743234	2.84314e+06	1.20072e+06	3.45146e+06	5.44327e+06	987373	2.7036e+06	2966434	1651408	4121034	2766949	5045560
391.285	2.501	[M-H]-	Hyodeoxycholic acid	C24H40O4	346306	389909	401397	293738	427291	354870	341021	358306	33702609	20227080	5428686	33900338	16198202	24005688	12311194	50730862	40898312	19941433	31886134	46340041	63588788	31167275	102355025	39153250	72635481	28067303	20133442	20425569	12962438	49824734	12749613	12795310	19876467	59140344	17470952	40754172	23715000	53459525	71221994	22373612	36580875	28085522	142738250	109812562	70171750
110.027	12.705	[M+H]+	Hypotaurine	C2H7NO2S	261047	248011	244047	255274	253106	216663	248181	278819	457128	584853	557024	222325	355561	129873	422701	118201	234927	237156	198067	247111	139263	91849.1	193034	126371	202359	332636	432501	155515	26403.8	313637	303148	154497	274328	166147	273210	104893	305300	371608	101245	238757	400288	317578	263687	209150	375403
137.046	7.278	[M+H]+	hypoxanthine	C5H4N4O	2.00085e+06	2.04069e+06	2.12591e+06	1907256	2.12666e+06	2.02515e+06	1.8417e+06	2.28676e+06	1.85377e+06	648122	1508238	983542	804685	1089526	476078	1.47864e+06	2.57599e+06	1.87306e+06	838572	1.04358e+06	1.30636e+06	2.24889e+06	931329	1078681	888568	837670	1.13836e+06	801600	751226	915190	1.16183e+06	1.7699e+06	798254	505520	547005	5.31108e+06	1.75293e+06	1.34672e+06	2069834	837775	2.48163e+06	1.20563e+06	2.54694e+06	690526	1.69226e+06
160.076	3.126	[M+H]+	Indole-3-acetaldehyde	C10H9NO	35335.5	42231.8	51973.2	66425.3	78964.3	74018.1	77250.6	70241	100438	103115	396016	56622.7	99338.6	113344	118274	146618	73834.2	85577.2	140398	98246.2	85526.2	97686.1	56298.4	115143	90905.5	67506.3	68583.7	88193.1	120089	130079	115324	112904	70802.7	99392.6	90102.7	108880	102554	68586.6	158009	179462	184737	138640	114782	62523	206389
174.056	2.677	[M-H]-	Indole-3-acetic acid	C10H9NO2	165442	158656	143641	159416	183552	141481	165542	170580	10802637	8051669	41898609	14567284	30830219	5763897	15971350	21794381	132161638	11995820	15548462	11309194	56875244	41069962	21368283	29151853	9818044	6590833	23510888	15587306	64723381	8925175	17886606	22680583	8938822	50964697	17005908	21329894	29328941	40170047	18836888	20810781	29259453	15184317	59824375	29051934	27496088
162.091	2.668	[M+H]+	Indole-3-ethanol	C10H11NO	4313.79	5021.85	3575.71	4645.63	3905.94	4216.38	3697.34	5171.2	9459.76	12827.2	2036.83	3622.16	4328.95	4457.99	9719.69	11339.5	6135.19	13767.1	1857.87	4103.91	3500.5	10306.9	3169.4	4085.76	4044.25	1977.79	3011.1	6288.31	3222.44	2907.04	9858.65	9357.69	13480.8	11888.3	2816.89	4117.84	1687.05	13361.2	6023.79	4430.51	35451	2368.65	3733.53	2592.23	12954.7
269.088	8.079	[M+H]+	inosine	C10H12N4O5	735395	672846	725333	688585	683345	656976	645583	665411	760611	967404	1.7195e+06	547266	907716	635775	1022831	1.66687e+06	1.65823e+06	1.90109e+06	1.3456e+06	406393	581454	699196	867024	868510	1.18995e+06	1.1395e+06	755908	801641	615592	926734	1.22732e+06	1247382	1.09676e+06	715162	351366	1.64312e+06	728625	580361	538767	1.1383e+06	367949	712863	934541	1007183	1.68635e+06
132.102	9.31	[M+H]+	isoleucine	C6H13NO2	18033646	19528190	18380470	20593766	19627274	19387650	20096064	19834320	25131846	37474444	15925152	20915762	21625642	21876510	20729034	16775035	22383062	14975901	21003466	21986018	17719514	21553490	22337894	15131139	20969968	19865480	16754333	22832736	23805202	18014214	18357296	25507040	22840518	33759764	21701202	20892858	20622250	19085774	16777446	28163730	21090258	24136562	17386496	19418422	16253141
188.035	4.198	[M-H]-	Kynurenic acid	C10H7NO3	1.33128e+06	1.30334e+06	942845	1.17547e+06	1.45106e+06	1.47876e+06	1.42209e+06	1.07492e+06	132882212	107707312	358223975	119258050	165667600	236830175	197576212	144186600	100789675	66774331	168883188	151420862	340125925	537421250	128376250	258063750	82035019	73490675	123724412	216052925	515814450	98304700	74620600	151617838	149423938	356705600	391595800	187837162	427633950	268996650	416815125	144729088	645867850	239260400	291470800	791459850	438288400
89.0244	7.458	[M-H]-	lactate	C3H6O3	34955444	35980112	33458470	34129136	31344160	32489502	34110124	30849270	3825863600	4051764400	4944154000	0	3651979200	2965300000	2403182400	3301211200	7697708800	3775723200	4013374400	5985452800	5113258000	3656516800	3161027000	4579474800	3746204800	4545412800	2765296600	2726989800	4110887200	3942757200	3417290000	4868955600	3614902800	3024536000	4426200000	3641342800	2737850600	2928035400	3540499600	3640776000	6591526400	3932870400	6269683600	2839370200	3402109200
341.109	13.543	[M-H]-	Lactose	C12H22O11	1.37642e+06	1.28743e+06	1.47163e+06	1.5535e+06	1569065	1.53804e+06	1.56094e+06	1.6137e+06	10011427	56570906	3638588400	20251220	11991013	22466942	17164683	1643680300	486007100	3138159400	14644219	29229472	14744497	2928470400	30464109	16666114	17844402	101839269	38833225	17816633	71278800	9625585	23321014	13773406	113954188	130966612	65485519	31543806	5083486400	7294776	12291737	82601675	92559850	99261619	29702703	33642253	12336872
132.102	8.91	[M+H]+	leucine	C6H13NO2	41498364	41399376	41042736	41164260	40233072	40490292	41034692	40904916	46277820	48730372	36066900	33170406	45430340	39798876	39947984	25210538	37214260	31657946	44396604	49810324	31733474	30005346	38145164	29621848	39647556	31809816	40618788	36668244	40573596	34304492	35262796	56276480	26488902	53070516	41172032	37819744	44807520	33201498	35755240	45292660	39484484	44042036	32579478	39494152	29660150
163.061	8.689	[M-H]-	L-Fucose	C6H12O5	405314	436845	484020	571319	555235	610843	427277	436516	58568306	84836325	93068050	72542019	49925684	39845616	72499125	43818375	82228419	155573038	116623800	184273562	25127411	145147862	42930628	77586556	74260419	45919388	78163319	25585714	62497662	66801869	56369944	16168655	165933238	118435338	125477750	51260975	81470606	41023025	15427648	99798550	183196938	43163953	67466119	65492725	54378819
157.025	8.481	[M-H]-	L-Hydroorotic acid	C5H6N2O4	17332.7	16969.2	21365.7	22193.3	20672.1	22381.8	18617.5	16837.6	3869229	5992958	3380867	3280289	4519015	2232183	4258629	1516920	1117083	4576845	4663505	5713188	2028542	5768322	2169462	2500099	1705843	1982415	5898857	1745077	2685463	2046075	2969313	3008831	4628934	3309151	4662966	3150993	6679962	1595089	1613725	4192804	2713660	3347799	2803559	5241499	3362144
130.051	7.983	[M-H]-	L-Hydroxyproline	C5H9NO3	475824	471238	385808	494612	549499	605787	528694	445801	84714444	123661962	115094162	72158406	101499606	40129816	108359338	73405131	112191638	76679219	145461200	87240894	62912225	87137250	94039994	109925350	103304425	97970069	80689975	58537544	207526562	68113181	88872956	89210981	137818350	133250750	119934162	89983575	61499631	72885894	46420700	78145400	99022150	81473231	81050831	100893731	82474956
279.233	2.226	[M-H]-	Linoleic acid	C18H32O2	509427040	495997280	540313088	535047840	497707936	535950560	493283488	531049504	87361606400	38251568000	37236188800	94010016000	47789004800	95788294400	62911027200	60687539200	11984578400	80901446400	54455552000	88825068800	88374444800	76816742400	58896352000	73716512000	23038520000	53355443200	59260857600	40953011200	63431059200	67173235200	58699488000	55979372800	61650899200	78349036800	47634432000	76769638400	59053088000	57239443200	127065280000	8359983200	60681932800	60583584000	46477286400	67829638400	48017971200
209.092	8.843	[M+H]+	L-Kynurenine	C10H12N2O3	516884	491011	467595	456994	423907	482191	439179	497942	469836	578512	1.16324e+06	809272	911790	513390	601939	1.25619e+06	532037	608555	733366	612175	1.02264e+06	1130395	858589	921580	648167	673181	941066	573519	700133	678012	617083	972287	525817	781308	745812	635433	613379	567308	383250	521847	892637	805505	1.04677e+06	554208	757587
163.061	7.666	[M-H]-	L-Rhamnose	C6H12O5	21013.7	29214.4	25158.9	34183.6	30202.2	30471	26642.4	34596.4	8947379	12702763	23735342	11065812	14516414	7217615	23683545	8158938	17732400	12533330	23591533	19812012	8494370	23341612	9004620	15099827	12759279	6905997	19711595	3353820	24127906	10418346	6944502	4582954	20944155	24676730	27079144	11832593	46627397	8320166	2300929	22926167	52668700	7626551	18895555	21171625	8483724
135.03	10.46	[M-H]-	L-Threonic acid	C4H8O5	6.43555e+06	8.00578e+06	10135293	10409951	12009212	10726256	11640629	12147265	2225055200	3487918000	5711347600	3012224000	2313061800	1080890900	3018960000	1266976500	3414582800	2628655400	2906275800	2941017600	1611745900	3456956400	2336081400	2044908200	1735571400	3789088400	1773838600	1175056900	3596539600	2832813600	2779521000	1680732200	3872872800	5551239600	3269278400	2153813600	3808912000	1829772200	1213126400	3742603600	4420684400	2033681400	2262492600	2280096000	1312803500
147.113	18.385	[M+H]+	lysine	C6H14N2O2	3.42483e+06	3432013	3.40458e+06	3.38436e+06	3.13218e+06	3.08062e+06	3.40121e+06	3589531	3215462	3.8484e+06	3.81575e+06	2.54326e+06	4488084	2.38062e+06	3808714	2.03629e+06	3.48895e+06	1.48104e+06	3579026	3.625e+06	2.49109e+06	2528240	2360507	2.11273e+06	3.70366e+06	2.9144e+06	3.11305e+06	2.86101e+06	2.21583e+06	3124486	3751261	3100244	2.56552e+06	4.22638e+06	3.21222e+06	2.27525e+06	2.57513e+06	3.49757e+06	1.84811e+06	3.7551e+06	3212708	3356459	3093263	3026210	2.18512e+06
133.014	13.146	[M-H]-	malate	C4H6O5	214736	403267	432900	488405	541151	543861	533012	601511	50694762	141703350	137554888	54436075	147431162	46772812	56099144	45981016	239615125	158221138	93701706	157550338	108923862	95605406	103121681	201919200	140044350	136821100	36197900	69435062	87596319	58317444	263451900	70134844	106447262	142928538	119996088	67964581	92361269	75898344	32168791	376202700	76712456	72679600	88510756	104056931	76364731
103.004	11.956	[M-H]-	Malonic acid	C3H4O4	85618.3	86601.5	91712.8	103833	118241	135009	156670	122578	46354416	33113434	15574494	15873089	30461744	14443541	16986425	27052241	55422456	24125517	31582738	19352792	81616531	26410012	34969016	24614670	35639050	49966541	9775009	17432580	20657970	42358825	38903912	25756981	16812388	25000938	12709998	14888339	16274683	10642016	14005789	21920481	17577864	39529616	33007334	30846272	13849386
151.04	2.628	[M-H]-	Mandelic acid	C8H8O3	5.63455e+06	5.28102e+06	5445888	5.37858e+06	6.35367e+06	5.61556e+06	4.67035e+06	5391784	47912934	126522738	1729950200	40771650	257741250	116670762	125174038	455100950	201186962	73614556	115177612	156629188	36740153	116010838	48181428	61498506	46504066	143316700	98465769	112698238	46024712	66144269	102255931	132832888	56539631	80698881	72906456	77821619	541640250	80499319	184702238	149954000	94174269	147767562	168827712	86691019	70968400
259.022	13.728	[M-H]-	Mannose 6-phosphate	C6H13O9P	3291.11	5028.89	4371.31	4718.61	5275.38	4436.19	4340.66	5311.18	810577	748235	1924993	313459	309453	235255	566125	907875	1503635	571105	394111	761155	309330	3510414	220271	717296	628461	489543	471556	378801	1319633	456976	260139	484297	432799	393120	473927	5617637	1224029	391600	222783	658663	1422728	484874	1265299	372909	434345
150.058	9.736	[M+H]+	methionine	C5H11NO2S	2.56053e+06	2.55416e+06	2585758	2.46865e+06	2583258	2.50805e+06	2.62836e+06	2.67224e+06	2.21049e+06	3433246	2.73298e+06	2.14214e+06	2.23907e+06	2154177	2.15141e+06	1.81692e+06	2.29017e+06	1878856	2.04333e+06	2.47038e+06	3.67069e+06	4.02402e+06	2.05319e+06	1.91068e+06	2.7096e+06	2.08737e+06	2.69557e+06	2.10517e+06	1.98467e+06	2.30804e+06	2.48244e+06	2.61645e+06	1.79852e+06	2.79857e+06	3.40197e+06	2.17039e+06	2.56873e+06	2.35214e+06	1485544	3.8613e+06	2658149	1.82167e+06	2.92884e+06	2300671	1.8629e+06
166.053	13.268	[M+H]+	Methionine sulfoxide	C5H11NO3S	63595.5	102766	96388.9	113112	77648.5	96616.2	104855	93399.8	103078	149655	146620	78215.7	73684.7	43290.4	77323.9	43224.3	154987	71446.5	97947	135350	178378	205168	220930	75082.7	92945	153832	57733.7	92059.8	97742.6	120200	75625.1	117694	100236	97666.2	133675	63516.7	121321	85341.6	44178.4	279929	130376	174643	112331	112266	80159.9
136.043	10.778	[M+H]+	Methylcysteine	C4H9NO2S	159942	130044	124277	133207	138784	130799	137420	132433	113344	145990	103160	120741	115204	80125	205778	103061	124159	169831	144782	112106	93399.1	163150	128022	90383.5	159736	192731	132849	120632	119814	161359	324577	95866.1	307279	335721	182502	68058.2	261789	164418	43418	130913	149429	76911.7	131529	94387	65352.7
145.051	11.57	[M-H]-	Methylglutaric acid	C6H10O4	155171	168118	181143	191569	199238	208307	205701	228057	27701069	28295338	37804803	20851394	30232553	20366781	48204953	20134733	36310184	76908269	27238556	31199597	32960475	32652628	60206219	39403916	28986266	30265088	14485211	27993066	16213136	22961412	25919125	28813181	58770744	36503725	16006038	17919577	45129516	25677820	18049127	26006745	22603264	44584050	24307825	67949931	26454759
129.056	2.311	[M-H]-	Methyloxovaleric acid (Ketoleucine)	C6H10O3	35817740	35492868	43195380	44742196	38240212	45052428	41934400	32196422	8297298400	8138196000	8740751200	3630312000	6581559600	5103924800	2491615200	5318346000	7193864000	4654386800	5604356400	5224569600	10807296000	3398921200	5510619200	5322522000	5762754000	7749581600	3801006800	7413815200	4164627600	7289146400	4320640400	11021296800	2361629800	4801596800	2825440000	4649454400	4245330800	3178136800	4438150000	2959496600	4343606000	10667896800	4883574800	3555124800	5523918800
131.035	11.637	[M-H]-	Methylsuccinic acid	C5H8O4	1.02704e+06	1.11268e+06	1.06461e+06	1.08871e+06	1.11853e+06	1.12522e+06	1.17613e+06	1.13718e+06	139891450	186846950	154545250	141592462	116158812	133870250	141211662	119418062	139851862	168177150	141093638	193304888	175699138	146955350	156122062	230674375	202636838	118002762	117308712	106331838	209401662	148993038	149080438	172869400	130334950	148381388	128341688	123411412	179236588	134632488	134198350	155011462	130919988	245762025	132874750	118378488	122172650
209.03	13.271	[M-H]-	Mucic acid	C6H10O8	5972.5	6357.96	11389.7	9924.16	9747.49	10608.2	14346.7	12963.3	3072685	5224356	14508173	3691504	3059873	722914	3764282	1703554	1671254	10325527	5829188	8643627	1595750	7913155	1640833	5510931	4552248	9092684	2395990	12467776	9331979	3881870	6205432	903837	4136128	8371825	5943453	3135530	6163211	2646441	251429	6507258	8528028	2446029	3415716	3916495	993056
179.056	13.85	[M-H]-	myo-inositol	C6H12O6	4.52183e+06	4821000	4991536	4.92742e+06	5.00396e+06	4.94074e+06	5305900	5.50787e+06	767950400	1881486600	2256508000	959918300	923084500	534688450	1310221900	905166900	1461203300	776656850	1541399500	1375699300	639808950	1622132800	1216454800	1130781500	656383750	1685721400	853333600	575668650	1331634400	881280500	1912065400	559581650	1276368900	1621832000	1511258400	1136497900	1495429200	759952800	405111675	1302749600	2153849600	683396350	1240936500	1063293500	982701500
227.202	2.269	[M-H]-	Myristic acid	C14H28O2	62644564	73277760	71476632	67187480	68882968	72995576	68794952	65508692	8614083200	5041820400	8057200000	8818144800	6815532000	8022437600	7751564000	4938826800	3149229400	15100961600	8436290400	13330012800	8472923200	8345904000	7285534400	9687549600	3910824000	12584535200	8077838400	9870317600	6147811200	8693199200	5449290800	18110299200	7946452000	6661574400	6117892400	11527495200	7091288800	3972293200	13913574400	3352168600	5590088400	8884292000	4441785600	10899382400	10511462400
174.041	12.089	[M-H]-	N-Acetylaspartic acid	C6H9NO5	109538	116142	124887	137323	145862	124143	130676	144610	16013089	50957184	66214781	14799761	35722316	17383452	25276342	11926985	58895431	34210741	36539084	51138750	34950388	21312669	53192006	42074012	28311834	46939278	13457269	24605808	20270170	18529405	32546734	24081356	40059716	48747100	18754955	20388275	29324362	16851436	8314818	39505100	32793969	22308645	26387931	32132066	27010934
202.109	10.397	[M-H]-	N-Acetylcarnitine	C9H17NO4	133072	130243	141269	125937	128239	130997	128156	135923	833602	42358134	29421281	293299225	1023293	5584391	54618600	16243077	45397009	10779405	26148461	940200	508363	9666349	53835894	3922183	921061	146723562	4053495	9490044	13458481	179886112	88577831	2593649	4628294	3343541	11705210	5077114	10228376	8496279	779077	9431868	6371297	2134695	1704324	2721256	3550500
116.035	8.392	[M-H]-	N-Acetylglycine	C4H7NO3	641630	763201	720436	796701	874520	980980	854866	725340	73637050	126077762	119169850	57109594	93002269	47675016	60221600	97467119	70363919	109159662	163370250	149541438	36498175	99508619	260289400	105880625	81398525	101624650	97707544	210479025	164128162	110061538	254775575	96805950	110408612	114395725	86893150	82708569	165864738	55510000	25678419	78783981	78891569	142776938	75183281	153279288	135305038
130.051	7.983	[M-H]-	N-Acetyl-L-alanine	C5H9NO3	475824	471238	385808	494612	549499	605787	528694	445801	84714444	123661962	115094162	72158406	101499606	40129816	108359338	73405131	112191638	76679219	145461200	87240894	62912225	87137250	94039994	109925350	103304425	97970069	80689975	58537544	207526562	68113181	88872956	89210981	137818350	133250750	119934162	89983575	61499631	72885894	46420700	78145400	99022150	81473231	81050831	100893731	82474956
217.129	13.405	[M+H]+	N-Acetyl-L-arginine	C8H16N4O3	591573	504580	556443	525378	525274	534034	510954	534178	237621	473278	1.25715e+06	486130	244939	208058	228275	310798	348395	511648	563058	303074	423935	358430	343543	458789	1.17264e+06	531803	495761	295307	397736	220570	385571	181365	160608	1.30678e+06	635732	519217	392566	832262	128235	450463	439165	365443	513141	1.41995e+06	574278
173.057	10.448	[M-H]-	N-Acetyl-L-asparagine	C6H10N2O4	61267.8	70045.7	61809.4	72461.1	89498.7	64643.6	76641.2	84743.5	6960020	12345675	168861488	12226412	8084914	4608839	16375358	4984227	13367736	17584833	15188439	18893055	9896462	15320730	7766969	13256367	10796147	22082050	15235817	9146326	24329964	6175814	8910556	4953059	11943148	29302394	16365775	10468028	15160370	14466814	3284107	14746250	11265280	16882584	18626311	21665352	12005990
189.087	9.881	[M+H]+	N-acetyl-L-glutamine	C7H12N2O4	17397.7	21803.7	29572	27965.6	29597.8	22162.1	32282.3	35966.7	29869.2	56315.9	76279.8	21543.7	39079.2	14697.8	34619.4	16427.1	37975.8	53758.8	25104.4	126121	20133.2	26240.1	24617.3	48576	25449.4	49128.2	27761.8	26020.8	59069.5	9972.98	22128.9	11481.4	74188.3	57776.9	43063.8	26796.1	28432.5	28170.6	6530.7	24926.7	37749.7	72741.4	53860.6	69259.9	9829.69
190.055	5.711	[M-H]-	N-Acetyl-L-methionine	C7H13NO3S	148882	122612	135021	135916	159591	145580	164920	164267	36401350	48038397	85892481	28842622	27720238	17550767	54608056	49627053	55975494	23158655	28233759	51082934	24626395	43447403	47624428	51048078	45485138	27635241	51712659	21314267	199185650	18313462	37692434	25829905	49619128	63093125	43301125	50621728	54676675	37344209	27352872	36488166	20797475	29696853	33932772	64684406	45270953
175.107	13.101	[M+H]+	N-acetyl-L-ornithine	C7H14N2O3	549071	601964	549007	572150	598348	533145	571474	582545	251214	2.16479e+06	451596	1632328	1963783	165212	407358	2.71996e+06	509396	1.20899e+06	658593	326090	134524	1.16853e+06	913866	465554	468332	492656	1.39524e+06	282718	441130	557938	622325	239167	482409	796601	1.1491e+06	624219	439676	628601	98184.2	791626	782614	123751	611727	312415	445820
206.082	2.711	[M-H]-	N-Acetyl-L-phenylalanine	C11H13NO3	103451	49271.5	82287.2	46004.7	83059.7	108009	85245.2	106633	17494558	15696000	42893503	5572939	19397952	7719700	56447550	3640509	29163578	3884796	5112805	26476409	30443028	22766412	10624154	5743186	3259580	9920534	3676213	10466987	10959362	6349845	13804856	9860113	24028283	39561609	5880242	8574858	5351870	19953094	7967415	3771095	34849803	10895230	10357029	16037234	26170362
158.081	8.092	[M+H]+	N-Acetyl-L-proline	C7H11NO3	44454.6	42014.1	35028	37878.2	39281.2	47675	44050.1	37041.2	126626	169002	190044	65938	110638	54068.4	148494	50646.4	129645	67144.9	97260.9	207153	55640.4	277087	86896.7	111293	61858.5	51448.2	51302.7	35357.7	182905	63829.8	99600	67132.2	230651	243532	120856	37237.8	128984	87289.1	56717.6	115071	242322	95037.8	100428	128339	92704.1
222.077	7.154	[M-H]-	N-Acetyl-L-tyrosine	C11H13NO4	19732.1	17004.8	12371	21622.9	13672.5	13573.4	18018.5	10707.1	3423140	2444210	3047144	1739950	7936199	1964260	5517130	605474	2328499	2090353	1884004	6123595	3594612	2805542	1399161	2339094	1143769	1729452	767581	248856	803341	1251788	48180	2692282	2987427	2529706	1992429	851737	629998	2035620	177197	3091366	4056889	1795365	1854292	5591794	2714498
187.109	12.974	[M-H]-	N-Acetyllysine	C8H16N2O3	22886.7	26487	25098.2	26393.7	23200.9	29094.1	28998.9	30783.9	4857020	5752786	5576539	3416426	4223062	1897103	3057287	3743111	5432262	3048232	5109020	5497018	2959928	4862546	4183177	3491661	2695360	3587538	3351090	3691946	3905892	3249901	4819200	3725688	3446971	5153402	4636468	2821072	5066046	4543269	1637963	5595730	5617459	3125537	4791650	5466590	3332718
310.113	11.905	[M+H]+	N-Acetylneuraminic acid	C11H19NO9	157087	166525	171355	176705	171355	179709	182287	186357	28673922	32494647	48769800	23806062	21573342	13083966	44647084	22750700	20137358	32501197	28339359	47556303	12303079	51195247	24276075	22198520	20817142	22273186	26425216	10660853	49817059	16434808	26024252	10880991	64755169	66516706	41559897	25400930	41546703	19278662	12235527	29839597	46231316	20387192	22409367	28587438	14412102
131.118	16.266	[M+H]+	N-Acetylputrescine	C6H14N2O	374891	388342	401865	360450	362802	362317	374232	407897	397767	644508	979001	516014	480688	274466	670495	820444	565709	487575	307799	733118	690852	965033	490347	410936	508262	416396	456349	412439	364471	477613	861487	290459	632675	1.16926e+06	1110693	415178	616038	270812	261098	569723	492353	386441	420284	477105	386436
146.046	9.937	[M-H]-	N-Acetylserine	C5H9NO4	56356.8	55447.6	61373.6	63438.2	58948.3	76584.8	72196.1	71060.8	17433717	43003884	78057381	20574638	20349214	9365753	31882172	12360975	36102697	34064716	38008322	49696666	11139419	32016450	26262025	17642939	21987300	31826141	13579705	8410077	51368759	12403648	17678655	9465518	45784191	70640319	29288322	20152483	41741834	13105800	8186195	24588581	38183541	21062633	17516058	20829283	9542879
146.081	7.097	[M+H]+	N-Butyrylglycine	C6H11NO3	191562	224186	306584	262208	277348	322399	263185	266257	0	766458	503200	11807765	0	48974.1	1.90598e+06	1.41595e+06	674226	128685	298154	26760.8	32240.2	592953	1.36249e+06	59560.6	74082	1701238	46922.7	112841	96929.6	1.3755e+06	1398541	73746.8	323275	67246.5	100974	145024	89622.2	199330	41161.9	145436	293400	92702.4	90140.6	100743	130093
175.036	13.014	[M-H]-	N-carbamoyl-L-aspartate	C5H8N2O5	4463.02	6464.99	4616.99	4975.8	3722.14	4391.11	4365.41	6485.2	1546025	3067979	2539855	3064497	5476205	481143	4288459	187476	5852526	1807424	3911702	1577535	750655	6372277	1156628	3924852	1805713	3184719	2309822	608697	817562	923469	1616073	1566490	1246153	4147258	976511	8200897	1942800	1162365	349634	860311	2071694	1291172	2449037	3115509	1160548
176.039	5.686	[M-H]-	N-Formyl-L-methionine	C6H11NO3S	257160	218534	232126	232108	276552	243469	248293	284620	40980659	66848262	143143950	45784103	49219800	29707741	74510969	76972531	82014725	33531822	52772094	67275556	35852003	44467572	76833719	53478719	90554100	50386525	83287106	38219834	122487612	31989200	41305203	33581194	57227456	67952075	68161331	69719419	77934406	53138856	35457922	56637881	90216769	32768156	43689422	64102644	66581506
124.039	8.114	[M+H]+	nicotinate	C6H5NO2	14541.5	16891.7	18925	13623.5	11691.6	14089.6	12221.5	12440.9	3134.31	4917.36	36085.2	6753.86	6700.63	37931.7	3191.2	3918.88	4177.39	55586.4	15596.2	100420	5162.99	5360.79	47498.8	5180.68	3431.39	4816.51	2841.32	7877.76	14283.2	9134.29	6666.07	4330.83	8029.64	4605.31	15043.5	5785.82	59012.2	2613.13	2947.81	4826.97	9887.88	20779.6	4045.76	3856.4	5375.24
148.06	13.004	[M+H]+	N-Methyl-D-aspartic acid	C5H9NO4	3178176	3472402	3.57361e+06	3.71508e+06	3.57685e+06	3.47293e+06	3.63207e+06	3.80733e+06	3669374	1953558	3711236	3.6981e+06	3.47641e+06	4628588	2.44864e+06	1.67268e+06	2.75456e+06	4347100	3.10834e+06	7.29369e+06	1.88621e+06	2.25786e+06	1.22301e+06	1857101	3.70048e+06	4.74368e+06	2407670	2.26191e+06	6448816	1902526	3.03817e+06	5.06815e+06	4.66103e+06	2451717	3.56423e+06	5188583	3.06122e+06	5.54692e+06	7.58602e+06	3.479e+06	4.29803e+06	3.71302e+06	4.65509e+06	2.72991e+06	2370085
200.129	2.614	[M-H]-	N-Octanoylglycine	C10H19NO3	169215	148636	322296	263411	170262	134306	168988	156542	36601647	35244172	32904753	39829175	49981766	15201039	31542728	5313010	40428328	28548816	35201172	40010409	55184950	10871480	23657183	89068006	17631988	54384838	100049856	15332158	22322842	28975141	27148431	46031666	55564944	17066483	9325210	19273625	14034803	81918300	15310175	19914425	36635397	180913700	136566362	122698288	58796206
168.066	4.053	[M-H]-	Norepinephrine	C8H11NO3	67483.8	60474.8	56595.7	58777.7	67597.8	75570.6	42516.2	30911.8	6233350	6529754	3329843	4418416	6898904	6593688	7897238	8479347	5754818	4920892	9169100	8454285	2047725	6654198	7140861	13985683	13525362	4163186	7266982	3009000	8268505	12810887	8298560	4227225	12596278	14834080	22517744	5083270	5850593	8812397	740069	9116270	44904234	3083877	9966078	5835602	8474074
132.066	13.018	[M+H]+	N-Propionylglycine	C5H9NO3	2.06554e+06	1.89108e+06	1.97843e+06	1.92802e+06	1876772	1904458	1969839	1982908	2659462	9869921	1.36378e+06	2.62181e+06	1.73236e+06	934042	2.53854e+06	574456	1.44815e+06	1.58825e+06	2.46309e+06	1.19427e+06	2.31737e+06	5.53075e+06	1.6317e+06	1.76046e+06	3.29651e+06	1.15578e+06	2351749	4095732	740597	2.81785e+06	2.59764e+06	887170	5.9138e+06	3743234	2.84314e+06	1.20072e+06	3.45146e+06	5.44327e+06	987373	2.7036e+06	2966434	1651408	4121034	2766949	5045560
156.067	5.776	[M-H]-	N-Tiglylglycine	C7H11NO3	170719	156024	150676	138860	142339	158824	157299	135284	8452944	20922500	47388100	6779132	18964461	30558222	44973984	9997885	42960759	6828548	46014772	39622997	3052829	27275262	50614662	49339975	14906398	22122320	18523650	23996308	29094938	3924998	54226756	15363031	36160225	71163525	27748881	14951300	82504419	22572842	7712150	36679075	29911603	17731995	11458684	115606312	35079600
146.046	9.891	[M-H]-	O-acetyl-L-serine	C5H9NO4	56356.8	55447.6	61373.6	63438.2	58948.3	76584.8	72196.1	71060.8	17433717	43003884	78057381	20574638	20349214	9365753	31882172	12360975	36102697	34064716	38008322	49696666	11139419	32016450	26262025	14768433	21987300	31826141	13579705	8410077	51368759	12403648	17054589	9465518	45784191	70640319	29288322	20152483	41741834	13105800	8186195	24588581	38183541	21062633	17516058	20829283	9542879
107.05	1.854	[M-H]-	o-Cresol	C7H8O	5136822	5.6947e+06	5.67389e+06	5.30481e+06	5.59781e+06	5.61978e+06	6.19699e+06	5.80108e+06	1762353400	902562700	13836750	911306100	1136740800	1464189300	2730928200	799123600	3330915800	850797200	2050941600	908252500	836989850	835395450	1118283900	725450150	2430484800	1144065900	1603117200	702379750	782183350	823084250	1329131600	307099200	318547000	1620091500	2548824000	983290700	2812471400	1594182000	864131900	766479250	39090747	269362525	1424793300	1242865600	786763050
142.027	14.302	[M+H]+	O-Phosphoethanolamine	C2H8NO4P	28570.2	22830.9	24302.4	18882.2	26950	24275	24178.5	30347.5	46401.9	38123.7	80460.6	22562.5	27059.4	18500.4	30824.7	30808.3	70847.3	49251.4	25350.5	37802.2	24756.7	45591.4	22234.7	80400.4	18254.3	20840.8	54088.1	24987.1	90086.1	36501.1	14531.6	22752.3	18249	30662	40387.7	89073.2	28962.1	22861.8	11340.8	36163.7	30410.4	14478.9	41257.6	31960.3	22755.1
142.027	14.302	[M+H]+	O-Phosphorylethanolamine	C2H8NO4P	28570.2	22830.9	24302.4	18882.2	26950	24275	24178.5	30347.5	46401.9	38123.7	80460.6	22562.5	27059.4	18500.4	30824.7	30808.3	70847.3	49251.4	25350.5	37802.2	24756.7	45591.4	22234.7	80400.4	18254.3	20840.8	54088.1	24987.1	90086.1	36501.1	14531.6	22752.3	18249	30662	40387.7	89073.2	28962.1	22861.8	11340.8	36163.7	30410.4	14478.9	41257.6	31960.3	22755.1
155.01	7.493	[M-H]-	orotate	C5H4N2O4	18351.7	22602	25991.8	37150.2	26325.1	34794.2	26727.7	24708.1	6928594	9147865	943898	23647994	66169256	795267	2057785	1215448	3643481	2133850	3525757	2556212	4431094	70936294	1605759	1825878	13790970	1155254	34501388	1766784	1050850	1522706	1839497	1277144	3224957	2759759	2421724	28861416	2807148	8417120	1394087	4927303	13901542	2019151	2695513	2448185	2159150
159.03	10.452	[M-H]-	oxoadipate	C6H8O5	10382.5	9815.62	12251.2	16490	16376.3	11650.8	13156.4	14040.7	1884912	4133174	6613026	2024396	2123550	1648979	3664160	1611832	4869759	6294737	3484940	4241056	2930772	6546776	3030034	4190203	3216940	3809606	2015416	2537916	2851568	2242747	2032901	1602541	3160949	4386762	2787044	3072194	4251251	1902079	718247	3823311	4477625	2314769	2236141	2104325	1865344
218.103	8.067	[M-H]-	pantothenate	C9H17NO5	41533	47784.5	43529.2	50833.5	50041.1	56615.6	57875.7	38139.2	7643141	7093223	10417416	8118796	11063710	6870990	8522230	9261557	16751575	3150005	14031377	15820536	40640453	7704744	8265805	11904804	6312571	12794104	4672711	5053733	11605927	6558666	10357662	11334001	9633025	13875073	9268260	4730361	7959129	4106707	5574100	7343884	8419370	11083134	5425655	12347087	6419291
151.04	2.627	[M-H]-	Parahydroxyphenylacetic acid	C8H8O3	5.63455e+06	5.28102e+06	5445888	5.37858e+06	6.35367e+06	5.61556e+06	4.67035e+06	5391784	47912934	126522738	1729950200	40771650	257741250	116670762	125174038	455100950	201186962	73614556	115177612	156629188	36740153	116010838	48181428	61498506	46504066	143316700	98465769	112698238	46024712	66144269	102255931	132832888	56539631	80698881	72906456	77821619	541640250	80499319	184702238	149954000	94174269	147767562	168827712	86691019	70968400
166.086	8.604	[M+H]+	phenylalanine	C9H11NO2	18967842	20288170	19051600	19503178	18432514	18608444	19525608	19328494	16096892	18923712	23572018	17634714	17796976	16434081	16089385	16637109	18494674	15335321	20502184	20261486	27524866	28811782	16825696	15497691	19169230	16240632	25492096	13395288	18795368	17148870	17986996	21521434	11518373	22766974	18976048	18981678	16644563	22480912	16203255	29276200	24305034	18820344	20543238	16637217	18754718
184.073	14.792	[M+H]+	Phosphorylcholine	C5H14NO4P	31807.8	33965.6	28216.3	26561.5	26291.6	28043	21569.7	26470.6	50708.7	42120.9	135775	22884	22191.6	25027.2	28978.2	40096	56515.2	77268.7	22573.3	31478.8	17058.5	62450.8	25734.2	62996.2	24808.9	20836.9	57198	19831.9	63825.9	30403.5	20825.7	40575.5	10959.3	34724.7	40882.2	157344	62572.6	35645.3	21269.5	43133.1	24776.9	16326.7	45446.9	30027.9	27161.7
159.066	10.46	[M-H]-	Pimelic acid	C7H12O4	54536.5	54761.2	51642.2	49524.6	62051.7	49922.5	70138.3	68012.8	8545005	11970177	22402870	2433608	12604776	1769559	90106150	6227164	31925578	22749588	7311534	20139358	40185053	28097616	10624391	49152453	17228295	7036127	7210360	16423864	27767316	22725967	23413245	5368348	17771295	41330091	4888349	2101616	1879162	16168773	3576788	10304862	6673655	26708759	7509293	18675530	6662023
116.071	11.341	[M+H]+	proline	C5H9NO2	110113280	103103800	105665384	101510824	103307704	98926824	105967992	108332712	144176144	142625584	156200896	88138408	80868344	77601112	102275608	54923244	127836776	77527480	132433600	86917280	95314592	111509920	124028312	62777984	185637632	143932624	105852744	99881280	90668264	108158848	114115232	89760216	140058912	145672944	113537384	119104824	140367504	196424448	69046128	159988800	173830080	75602336	156529392	139572432	121435608
128.035	8.525	[M-H]-	Pyroglutamic acid	C5H7NO3	4.03839e+06	4.72162e+06	5.59189e+06	6.76991e+06	6.92023e+06	8.28517e+06	5.80256e+06	5.29685e+06	775992250	752272400	1080955500	518304750	672089550	686656150	814348950	557596750	850688900	942036400	1393627500	1677980400	786565400	1430261200	524600250	850424500	531270450	525283050	578628950	680639750	935300500	418656275	669410050	704546950	1734947400	1043097100	1242676500	664296650	953408000	618945400	502963650	1394278800	883269900	571136350	732619200	1081827300	731474200
87.0088	4.025	[M-H]-	pyruvate	C3H4O3	14799139	18424490	14060451	13360087	15697192	14671032	16524152	12726093	1029307900	1304461200	1085511600	1003184900	1039477700	949022700	789775450	1868246400	3351104200	877722400	996660300	2584489400	2372976000	1466746700	1633030900	2688261800	1669635200	1414814900	1459717700	1441454000	2565315000	1473235200	1153706400	2726589800	1453785700	909708100	2403803200	1583167100	1203563500	2285528000	1098036200	1916916800	3023909600	1326995900	2525898600	1294786500	1700296200
377.145	7.898	[M+H]+	riboflavin	C17H20N4O6	13582	14248.3	13309	13452.6	12386.6	13478.1	15453.1	14424.5	158665	368685	3360452	1517241	594331	983014	1270234	3218058	159652	1567870	1123636	13907798	2667798	618465	1593581	3497959	467680	344802	1446657	606398	611162	1204465	1019888	2501021	1938974	1295619	1620012	540311	5288151	587425	315330	1118136	1413745	1601868	4889177	935855	295081
149.045	10.516	[M-H]-	Ribose	C5H10O5	1.37801e+06	1.48182e+06	1.85064e+06	1.88994e+06	2.08191e+06	1.89615e+06	1.92392e+06	1.96378e+06	391769900	693902000	948279200	469269600	362736625	233903075	741973650	269054300	612223350	1200235200	617125150	647952400	244042625	771317450	426366950	506048100	561223950	473763150	471358050	231746575	514196350	509058550	409267275	168896962	710170400	738337450	696578600	588890450	790211050	296370125	120105750	669318000	1243396300	399037375	320019475	450957250	317239800
257.078	6.796	[M-H]-	Ribothymidine	C10H14N2O6	74909.4	103122	87858.2	84773.2	75315.6	84927.9	71072.6	81622.6	9794048	8429468	6766677	9659974	7825406	6454104	10827443	7462266	11363622	10633422	10302465	9500441	6057168	8999073	9891460	12587206	8757244	9018982	10753198	8538565	8094913	14896956	13245775	9645116	9350659	8800321	13671208	10339638	12090984	9746887	5521255	9235979	6717124	6508928	10009448	11878209	10702794
385.129	13.435	[M+H]+	S-adenosyl-L-homoCysteine	C14H20N6O5S	17765.6	19734.6	23094.9	19879.8	18847.5	21153.4	18882.4	21596.6	4467641	5005853	5426582	3387360	4642079	2354414	5605882	2235130	2839144	2503188	5236610	5043843	4334156	4863933	4449983	4627724	3383510	4894639	2977968	3062901	4932366	3109912	4591109	2727953	5402499	6568000	5877198	4124362	4070699	3670482	2071301	5753645	7277196	2993610	3765664	5058518	3095831
201.113	10.428	[M-H]-	Sebacic acid	C10H18O4	59651	54783.1	71372.2	65379.5	79113.4	65941.2	60563	79110.6	13794148	15054977	7480232	5557362	10854085	8372455	20215970	8989069	16460200	15420736	11114816	7963091	13223594	12846853	23052998	9359415	11715985	17118944	6885974	9148157	11342927	9615212	7760193	11749700	11219841	14108058	11870566	13244402	11369941	9824403	12195216	9966425	9297131	17982862	10462291	28627603	12007607
106.05	13.598	[M+H]+	serine	C3H7NO3	2.21453e+06	2378567	2.16983e+06	2.20557e+06	2.19001e+06	2147636	2.32844e+06	2369353	2174746	2.55938e+06	2.24948e+06	1919663	1.98076e+06	1.40931e+06	2.19621e+06	1.69223e+06	2833954	2.44791e+06	2.30861e+06	1.69804e+06	1.31867e+06	3329953	2489627	1372305	2.35495e+06	1.62248e+06	2.23507e+06	1.54739e+06	1.85575e+06	2.48198e+06	2.39007e+06	1.52045e+06	3.09265e+06	2.11036e+06	2.98987e+06	1.98072e+06	1.66093e+06	3280404	1.64666e+06	2567403	1.91167e+06	2705500	2.70218e+06	2.86512e+06	1.66114e+06
177.102	9.24	[M+H]+	Serotonin	C10H12N2O	75271.4	85007.9	80732.5	76232.3	70184	79710.1	69655.2	66865.9	42812.6	46646.5	370804	29032	12524.5	24311.9	87417.1	234231	245447	342239	115195	84585.7	17366.7	85610.4	45805.8	46042.4	88300.6	23371.1	36701.5	64774.6	227915	85538	60642.9	99375.4	178659	96268.4	27428	61108.2	97613	36661.7	39890.5	126533	28969.9	36081.4	75118.5	66745.1	73274.5
171.006	13.501	[M-H]-	sn-glycerol-3-phosphate	C3H9O6P	8984.45	5985.52	9887.12	8280.53	9918.69	9202.24	8407.65	8769.81	2000822	2999351	8029463	1744063	1597847	948166	1669977	1478759	2237787	3534606	1890342	2140019	705377	2171087	1172240	2931626	1573698	1594179	2156996	1110579	4057111	1492507	778090	1549910	895520	2947810	2571153	4487797	2178266	1739442	808251	2921854	1991431	1310064	1692837	1715882	1309813
283.264	2.203	[M-H]-	Stearic acid	C18H36O2	409553888	402975584	409552128	449458816	435259936	403732736	398891264	408775904	20765790400	19610414400	9222200800	24332728000	17568622400	19766744000	9743241600	17767774400	5463394000	6183278800	22998043200	19561433600	32630121600	22224686400	21538944000	24878420800	24278536000	8258909600	31281113600	38428771200	27508572800	21618321600	24213793600	26644198400	20552358400	22010579200	33115024000	19424051200	24373806400	30500748800	27453980800	27777510400	25231552000	27142048000	22600772800	29976496000	30750361600
117.019	11.837	[M-H]-	succinate	C4H6O4	1.67382e+06	1.54411e+06	1670548	1794957	1.90001e+06	1.77171e+06	1.85438e+06	1.95701e+06	210940475	332934000	312993075	164985700	309315525	217751625	167343362	146601662	411909925	227497400	264058175	402165275	514237050	188339000	380868925	256090075	319132725	297152675	112966838	297045225	141614762	293587675	236058125	356396100	163009600	207852550	135651000	156113438	188939962	149210938	203147112	205668188	268285875	431140200	221219675	184732650	246668325
149.009	13.197	[M-H]-	Tartaric acid	C4H6O6	28514.3	43406.9	51000.3	53748.4	55049.1	73240.4	96538.5	59994	7848623	460245300	338200675	502296350	27360028	1695762	68063500	226569	1934526	2744177	42958616	2564666	2801702	81749256	2769145	89908544	1799199	444885850	13451717	3161301	4294567	7653177	39275291	3706096	1434836	5464391	18386862	5603850	20511102	1739738	670978	53226481	7080359	8200312	1700323	32302769	2024635
126.022	10.354	[M+H]+	taurine	C2H7NO3S	13371904	12963941	13025440	13118709	13101385	12263960	13412837	13068696	14305027	14879788	26047664	12723692	10609893	13804517	11965136	8781445	18790348	9671759	12397624	16078604	11452099	13310403	14375145	8589173	12147999	7.95477e+06	15779395	13204301	10640177	14000171	10237830	8601803	8.25331e+06	15073193	35586260	10663413	17908330	16249629	6.80304e+06	15614277	13358624	20398342	17837534	16283272	10152539
498.289	2.48	[M-H]-	Taurodeoxycholic acid	C26H45NO6S	493645	786118	802031	711150	800880	685699	797694	710999	10378653	11578062	35089988	10339170	4804254	372146475	0	40999434	39867497	14036142	24498192	153788500	3829042800	4366563	233832025	4664654	44046541	17415377	15497869	21291295	15894244	70832600	4943572	3090085	0	5175035	35830141	15957088	7509124	177249562	51235909	64701019	42066575	805568650	132094750	59889731	40099316
188.07	3.43	[M+H]+	trans-3-Indoleacrylic acid	C11H9NO2	149369	155302	168511	173727	156595	178160	174921	190758	254208	413238	152519	120418	312239	528806	543435	151464	189813	84054.6	571344	391674	391540	108033	74150	885918	99286.7	384554	65391.9	323586	1.04642e+06	210093	283038	733150	323458	695531	1.02643e+06	162832	771551	132108	183811	352870	39587.3	346259	223621	601207	320616
143.071	8.448	[M-H]-	trans-4-Hydroxycyclohexanecarboxylic Acid	C7H12O3	41776.4	51365.3	35749.8	49205.6	48836.4	51525.6	44480.5	50687.2	1441500	5865405	1252489	2178754	1041920	668290	685328	646110	2479147	9992134	3233396	6720620	4656247	584887	6063826	29007928	813248	1121390	667616	2491308	949114	1639507	5826379	456196	9120162	1835112	752771	851875	839878	4163561	3380977	475754	1009774	3231265	909859	959408	745322
341.11	7.269	[M-H]-	trehalose	C12H22O11	23391.7	25086.9	27256	27198.3	27019.6	28496.8	25150.1	25821.6	4802596	4546626	8479095	3581455	5036473	3961500	4613244	3884378	5125445	3473434	5128795	5804725	6076589	5679648	3814255	5027653	1861110	3949856	4200854	2994967	9055449	3450575	4108561	3255562	8817970	8109713	3935989	4568584	5036336	5283181	5006106	5727309	6129821	2806438	4819689	7060378	3904939
175.025	13.281	[M-H]-	Tricarballylic acid	C6H8O6	62383.2	66431.2	74265.6	78958.6	80876.7	92481.2	98515.8	94032.4	25012108	35196378	10701174	5104719	26824372	2465753	22915917	3286052	3651877	7930033	16064911	8617485	9106684	49131212	13641798	15035347	7947503	23718292	6492605	13545130	60325375	20260327	10855162	13892602	18340252	40969403	7953105	8071092	4498841	11885838	2228409	25803405	42326222	41524509	10790404	20065525	9672769
203.082	8.898	[M-H]-	tryptophan	C11H12N2O2	4941488	5.37335e+06	6.11282e+06	6.04684e+06	5.99763e+06	5.98837e+06	6.22002e+06	6538222	570445600	575891000	822515050	679595550	774217650	409054625	419601600	573130800	652161350	639418250	687934000	592130650	779083000	446190250	474881750	635158250	609615850	802353350	522603000	455064800	572150850	724895200	652799250	1141513300	317485200	509662350	480024950	631333150	444509000	570038250	474995800	450400350	948472400	762209400	897840300	372662600	919892200
182.081	10.267	[M+H]+	tyrosine	C9H11NO3	4.89551e+06	4.43971e+06	4312906	4.36384e+06	4156996	4428699	4.29233e+06	4.39553e+06	2.25116e+06	4081292	3361798	3323330	4770480	2513774	2802356	2.32366e+06	3.21047e+06	2.40477e+06	4.03969e+06	4.16198e+06	5216018	2.33056e+06	2.89356e+06	2.45755e+06	3.34818e+06	3.54017e+06	4.00799e+06	2.60595e+06	3.65213e+06	3384374	2.98381e+06	4.50728e+06	2.13827e+06	3.81001e+06	3.33429e+06	3118056	2.25754e+06	3.35709e+06	3.08142e+06	4.17384e+06	3.59229e+06	2.43526e+06	3461219	2.86899e+06	3.49955e+06
185.154	2.347	[M-H]-	Undecanoic acid	C11H22O2	577451	504727	559727	503566	579826	636759	518664	567434	58766469	49562862	92536175	57659381	53815894	34644909	41519550	23919712	48150338	110083612	52863500	40148550	61398788	34715578	60609006	57553369	40193747	98481406	33728322	59047600	20948988	56374600	29632275	63868431	27200884	34912922	25452839	43583691	33046556	33295991	52406875	30344891	41744066	55042681	29183897	47099972	53475288
111.02	4.809	[M-H]-	uracil	C4H4N2O2	43219.5	40870.8	44806.5	34920.8	47809	34075.8	39832.7	35337.9	1871257	3044268	5544743	3961964	1010748	1883680	4542710	4963778	2685118	2966087	2445061	2256588	2975680	2659044	2423479	3517395	3460700	1448916	5733250	1103338	3174103	1580588	3089635	2809092	4353540	2948898	3002843	3001080	8906344	2669261	2921850	3207646	4295103	1419161	4182989	4390062	2023592
175.036	13.014	[M-H]-	Ureidosuccinic acid (carbamoylAspartate)	C5H8N2O5	4463.02	6464.99	4616.99	4975.8	3722.14	4391.11	4365.41	6485.2	1546025	3067979	2539855	3064497	5476205	481143	4288459	187476	5852526	1807424	3911702	1577535	750655	6372277	1156628	3924852	1805713	3184719	2309822	608697	817562	923469	1616073	1566490	1246153	4147258	976511	8200897	1942800	1162365	349634	860311	2071694	1291172	2449037	3115509	1160548
169.035	8.206	[M+H]+	Uric acid	C5H4N4O3	56893.1	47750.8	42981.4	34428.5	38376.5	67851.7	45572.6	53708.2	29980.8	90048.8	144755	100754	44493.5	20542.8	81309.8	151022	56464.8	42435.2	47813.6	9765.51	24719.1	50869.1	36014.6	44688.1	126569	25997.9	68121.3	27021.5	82060.4	28378.1	28283.4	41426.5	62582.4	114372	60411.5	105848	41709.7	74586.9	41886.3	80795.5	86466.8	31762.3	69796	43186.4	33604.9
243.062	7.426	[M-H]-	uridine	C9H12N2O6	742504	656973	770257	739954	669302	675659	739341	690040	96703200	36849247	78834875	98534875	139005288	98777300	72686369	92068181	105380038	103266075	112549575	76233081	58331844	65825969	57493244	102733731	49495341	58474394	109142512	61221012	81243825	75654175	118188238	130736788	87554594	62954219	68343544	107664975	90957881	77312106	116905625	35018259	60759456	88314244	77866631	84875544	89652869
139.05	7.991	[M+H]+	Urocanic acid	C6H6N2O2	92699.3	108179	118864	113143	108394	122985	98669.3	88607.1	67173.1	300195	191743	143603	132131	48197	59812.6	66624.8	280911	101313	84662.6	142375	140307	196258	146665	281038	101020	81770.6	124828	55526.8	120605	110124	48647.8	122996	40201.9	101378	130286	92029	49835	140754	65588.3	99458.8	177634	100733	208993	120522	242204
118.086	10.629	[M+H]+	valine	C5H11NO2	41182240	42795900	42794372	41505396	41743728	39368176	41008352	42649988	37561492	44258428	39192144	35850736	39048508	30962574	43850660	22818048	37877444	33689268	48283164	42165380	26280656	48344244	45074528	30703146	37914940	41425788	33263782	34386988	40407296	30437762	32136246	38796164	27121936	51498116	45058464	38105932	47802620	37636700	27013434	47234988	30021302	32076384	29867694	39981664	29330760
283.069	8.486	[M-H]-	xanthosine	C10H12N4O6	9716.06	10152.6	8366.25	12572	11816.9	11530.4	11189	8662.98	4099802	963134	326079	8109609	36238866	586331	0	5145620	0	480201	1426119	780635	1161957	39324959	364997	1264498	3666939	629004	13471248	1307198	603985	173886	487154	1645152	0	535035	1646594	11392520	1282439	4268389	659890	1205314	863390	848347	554872	1136940	1497386
[truncated: 109 more columns]

## Sheet: Hoja1
compoundId	(ï¿½)-Lipoic acid	(R)-(+)-2-Pyrrolidone-5-carboxylic acid	?-N-Acetylglucosamine	1-6-anhydro-b-D-Glucose	1-Methyl imidozolacetic Acid Hydrochloride	1-Methyl-Histidine	2-5-Furandicarboxylic acid	2-6-Diaminopimelic Acid	2-6-Dihydroxybenzoic acid	2-Amino-1-phenylethanol	2-Furoylglycine	2-hydroxyglutarate	2-Hydroxyhexanedioic Acid	2-Hydroxyoctanoic acid	2-Ketobutyric acid	2-Methylbutyrylglycine	2-Methylsuccinic acid	2-Oxoisopentanoic acid	2-Phenylbutyric acid	2-Phenylpropionic acid	3-4-5-Trimethoxycinnamic acid	3-Cresotinic acid	3-Hydroxybenzoic acid	3-Hydroxyphenylacetic acid	3-Indolepropionic acid	3-Indoxyl sulfate	3-Methyladipic acid	3-Methylglutaconic Acid	3-Methylindole	3-Phenylpropionic acid	3-Ureidopropionic acid	4-aminobutyrate	4-Aminohippuric acid	4-Guanidinobutanoic acid	4-hydroxy-3-methylbenzoic acid	4-Hydroxyphenylpyruvic acid	4-Methylvaleric acid	4-Pyridoxic acid	5-Aminopentanoic acid	5-Keto-D-gluconic acid	5-Methylcytosine	5-Phenylvaleric Acid	8-Aminooctanoic acid	aconitate	adenine	adenosine	a-ketoglutarate	Ala-Ala	alanine
formula	C8H14O2S2	C5H7NO3	C8H15NO6	C6H10O5	C6H8N2O2	C7H11N3O2	C6H4O5	C7H14N2O4	C7H6O4	C8H11NO	C7H7NO4	C5H8O5	C6H10O5	C8H16O3	C4H6O3	C7H13NO3	C5H8O4	C5H8O3	C10H12O2	C9H10O2	C12H14O5	C8H8O3	C7H6O3	C8H8O3	C11H11NO2	C8H7NO4S	C7H12O4	C6H8O4	C9H9N	?C9H10O2	C4H8N2O3	C4H9NO2	C9H10N2O3	C5H11N3O2	C8H8O3	C9H8O4	C6H12O2	C8H9NO4	C5H11NO2	C6H10O7	C5H7N3O	C11H14O2	C8H17NO2	C6H6O6	C5H5N5	C10H13N5O4	C5H6O5	C6H12N2O3	C3H7NO2
QCMS1	564274	4.03839e+06	37715.5	329653	4.88445e+06	7.40771e+06	81448.3	31156.9	2.47757e+06	14815.1	843538	140618	4.38457e+06	505822	331989	150038	1.02704e+06	6.21236e+06	476906	237880	123199	14892.4	2279549	14892.4	803887	154369200	66590.3	2439404	54078.4	21450.3	8553.41	5.3426e+06	52392.8	1.27001e+06	14892.4	266031	1.34179e+06	1.0167e+06	12828505	2.62202e+06	38507.2	4295.77	32652998	1.66849e+06	93100.7	426228	198741	108933	4701316
QCMS2	541500	4.72162e+06	30663.2	335397	5.98749e+06	7.58773e+06	76886.3	39815.4	2.16186e+06	15835.8	870576	134711	4043306	549171	689710	132019	1.11268e+06	6.9967e+06	314111	257496	118908	15300.4	2.50004e+06	15300.4	799053	156710576	77390.2	2.33218e+06	40775.4	14421.9	14115.8	5.06456e+06	63400.2	1.3367e+06	15300.4	305707	1169589	1.20389e+06	12568083	2952462	38687.7	4200.8	33055538	1.9546e+06	99647.5	351087	262060	88967.7	5.32885e+06
QCMS3	574403	5.59189e+06	31842.9	328277	5.43011e+06	5.79017e+06	72069.4	33390.6	2389723	15240.1	720370	145151	4.39688e+06	461731	406390	130674	1.06461e+06	6609332	367064	256922	111420	12889.5	2.5854e+06	12889.5	703620	157747424	79018.3	2.39571e+06	46316.4	19808.9	15922.5	5.13488e+06	70984.6	1.37204e+06	12889.5	312166	1316469	1.20434e+06	13092611	2.80018e+06	28807	3915.98	32638998	1.67553e+06	86849.6	444932	261644	86180.1	4569811
QCMS4	638342	6.76991e+06	40078.1	338621	4.20227e+06	6802222	88524.7	33851.6	2.31357e+06	16905	750833	144772	4.43148e+06	440149	516402	126708	1.08871e+06	7088930	435303	329941	103329	13248.1	2.63016e+06	13248.1	706043	170424368	95923.9	2.46656e+06	40624.6	15184.1	15385.9	5.19727e+06	65141.7	1.44133e+06	13248.1	291552	928012	1.50684e+06	12664112	3085484	36834.5	5707.47	33029904	1842288	102730	427816	296102	105801	5008563
QCMS5	607855	6.92023e+06	38601.4	305835	3.80391e+06	6.57747e+06	93459	31872.5	2.22744e+06	12374.9	779686	160679	4.41409e+06	547347	604688	131122	1.11853e+06	6.43489e+06	574580	319428	99880.7	12161.3	2427830	12161.3	928098	146101488	92147.1	2.45296e+06	49280	16791.2	22170.6	5.17033e+06	54606.5	1411667	12161.3	380825	1897184	1.3901e+06	12827689	3.07583e+06	38906.2	3691.28	32910624	1.99051e+06	113331	450130	319921	104430	5172729
QCMS6	512074	8.28517e+06	43050.3	337437	6.67462e+06	6.523e+06	81758.8	40841.6	2.32722e+06	16908.2	801320	146298	4.83301e+06	639890	374438	134242	1.12522e+06	7.00168e+06	441091	213493	85359	16227.7	2.74703e+06	16227.7	718314	159508032	81791.9	2667166	56294	17163.4	14152.8	4.73244e+06	66693.9	1.43201e+06	16227.7	353713	1.12111e+06	1245407	13317920	3179541	35744.8	5000.65	31494318	2.01755e+06	106179	367830	329560	105315	5.25271e+06
QCMS7	651700	5.80256e+06	38040.7	335095	4.32151e+06	7.23368e+06	85676.4	41432.6	2347864	18602.3	900130	177821	4.69414e+06	524848	605976	155542	1.17613e+06	6.73391e+06	439309	190801	109588	17549	1.9943e+06	17549	650461	164525712	97233.1	2.51913e+06	50300.8	22341.3	18398.3	5.11875e+06	51031	1.49179e+06	17549	235149	1.54716e+06	1.19807e+06	13654465	3.57216e+06	40079.1	5829.72	36356304	1.99026e+06	107820	462318	318623	108107	5.25999e+06
QCMS8	694411	5.29685e+06	32377	291681	5.0948e+06	7.61466e+06	87241.5	37142.1	2.3418e+06	21677	600112	156465	4.97283e+06	494970	425195	147886	1.13718e+06	5.82883e+06	411110	184779	92743.1	18550.7	2.57628e+06	18550.7	798254	162027632	90694.6	2.58075e+06	45867.8	23172.2	22177.5	5.19642e+06	60124.4	1.51646e+06	18550.7	249722	1.51099e+06	1.31033e+06	14106707	3.31401e+06	33808.1	4518.36	33812612	2.24625e+06	107101	455454	326252	100499	5585266
1	1.18951e+06	775992250	47812.2	6044422	7911144	3205348	23581400	6513306	295594900	28761.9	120675712	33992541	612432550	81684219	48161384	129009	139891450	812146400	76729250	33783509	6771676	6783.26	2332460200	6783.26	267941800	50974595200	21969838	321186600	107825	17014.9	23896.9	14941180	168050	1303889	6783.26	17713083	301516875	1.07841e+06	1341607200	680109000	60472.9	4399.16	32901402	714765050	13585152	368721	41045188	116906	501234350
2	471749	752272400	70185	6896076	23801206	38959212	20458567	23963358	339882925	70489.7	505739850	138879062	624646250	99097656	57331100	142903	186846950	787716950	71625744	72111025	12406556	7124	592357950	7124	126336538	116301196800	29745491	319645075	169174	37353.5	37786.7	8157760	167798	2143620	7124	30344684	194701400	1.1674e+06	1641107600	788169850	130501	4051.07	36529980	1072225500	4672632	174865	81304481	99227.1	677154000
3	6466.39	1080955500	93736.9	393623000	34541608	9915183	104070500	3985738	349896275	22646.1	281573275	107012288	657029750	106647938	51963416	187853	154545250	1538020500	218241475	74238956	6392733	9044.12	93478731	9044.12	56111381	10375684000	60239962	311879275	1609.21	15897.9	38944.9	4846592	227081	5379800	9044.12	20885120	428623650	1.94542e+06	1343269100	1689560400	49513.8	3251.43	61180564	481518150	3608558	87913.1	127695688	266639	1053464400
4	619210	518304750	37661.9	100880169	12913120	5.67079e+06	19768136	5236266	498372750	9455.22	23769767	25190231	599574250	90459031	54497819	173000	141592462	558096250	68041644	255370750	5173723	5072.47	92019950	5072.47	277750000	24978995200	17157564	315170175	33061.6	5725.49	16147.7	4.692e+06	34192.8	905508	5072.47	55410769	196777488	1.60548e+06	1339593600	344769100	46513.6	2722.78	31043248	373665275	1746139	52307.9	35359616	70321.7	547432250
5	903736	672089550	34868.1	8569519	12426784	9403704	23584955	20752100	788924250	30066	112236838	59045062	492546550	60244744	24192595	148289	116158812	876721700	50534341	45445238	3048827	33141.3	87325169	33141.3	390649925	25583348800	25976477	276508100	110186	18590.1	16603.3	2.63111e+06	136865	1.99205e+06	33141.3	23480345	203913912	2.57523e+06	1591434100	303990975	57365	3728.68	29656784	718584550	6240722	169961	70592344	175483	620653950
6	986667	686656150	16201.7	7621641	9998517	9472817	34647997	3881266	212630125	21714.4	82874350	20573623	571956950	67338869	39994203	81278.3	133870250	663895750	44954938	50654872	3051738	15137.2	101575544	15137.2	211483950	38967849600	13249767	317683700	140109	8912.27	20350.2	2.80328e+06	126880	1404604	15137.2	272822875	231743775	1.43657e+06	1123893900	322632400	58913.8	3294.63	18112854	186899862	2318621	74191.6	32396847	68156.9	443273050
7	1.50388e+06	814348950	39730.8	77881694	12266396	29515914	49700975	5398776	270160400	99932.4	767641600	54595456	602503850	77578756	47604038	155685	141211662	748122250	80686381	61885069	3901460	8884.48	95237281	8884.48	232848525	58241542400	133279288	320738875	143367	25704.3	20225.8	7023912	216120	1.53839e+06	8884.48	10728665	253410725	2.38107e+06	1621480100	821802250	50532.7	5015.92	38159232	728542250	14634620	509642	34022475	179023	470835650
8	631529	557596750	64300.4	11382929	8691727	6.57971e+06	9606762	7237791	466086600	12745.5	18328352	18384955	538840900	121333862	81026900	197590	119418062	564303600	76487731	60627450	2982858	5662.06	120383550	5662.06	122955138	16000065600	11201373	295800600	82976.3	3701.55	17727.2	3.63066e+06	47434.1	907286	5662.06	13044388	242848075	1.50117e+06	783951450	332234200	88912.4	3269.8	25454110	461767250	32243881	1.12203e+06	27825491	60263.8	447327550
9	1524416	850688900	36125.1	20286761	18116702	9889706	27687022	6857484	591767650	32293	235367525	81745719	725517750	117232838	55455775	300317	139851862	1129750100	258827425	57595112	5723866	20082.4	175998700	20082.4	290167775	39453680000	38008575	330102425	61877.6	40219.4	22561	10698841	108775	1466581	20082.4	36162975	589266550	966791	1398506400	335706700	185142	3332.18	38667948	1003543200	16938364	615842	109611350	108832	1093192300
10	675517	942036400	37301.3	7293884	5186418	5066068	31427525	8798585	344270575	68280.7	125880688	66962594	632584800	101656131	61186494	136300	168177150	715878850	52385934	51534934	3545244	16680.8	42534334	16680.8	39134466	20932987200	21077617	339390700	40762.1	46376.3	16380.4	7.26706e+06	34722.9	579800	16680.8	20398695	267293175	460281	1306075500	848211700	59834.2	1655.5	19268638	802272600	64324781	2.75779e+06	82754425	138726	498410000
11	1.19062e+06	1393627500	69714.8	14243497	13975536	14605701	28803509	5595514	251720225	55902.6	371074700	84948619	590135350	56323281	60610231	268352	141093638	992436300	58534100	67631669	16465489	7870.57	170777888	7870.57	205307038	58086035200	43663397	319431575	175817	13627.8	37526.4	4445156	148048	1.76821e+06	7870.57	16154602	267462000	2071531	1840326200	844188600	45676.6	4788.19	32522474	638008750	49158597	1.70002e+06	65078538	313765	613111800
12	697665	1677980400	53977.9	10728491	12911923	6187432	34783822	5996993	405518525	79731.6	408181400	62398581	651287850	73547819	58867231	188420	193304888	710287050	99776144	43923984	2048962	7697.51	755583950	7697.51	121986025	81484678400	23087856	328947800	154504	18181.7	25916.9	3.13173e+06	322269	3.5266e+06	7697.51	20292936	236366725	2984000	1474220800	1315863200	53206.8	3230.3	35885560	671669850	7243562	238060	107328088	516591	976118500
13	772376	786565400	82932.5	8387812	2.9498e+06	4212913	11078902	3505229	139170138	51511.5	153072012	46726141	634825250	137733700	133328200	105229	175699138	1151881100	46556366	459313750	3771582	19304.8	7360212800	19304.8	234237525	16965643200	25073017	337867600	223246	42633.6	50427	3448306	56201.7	1.61644e+06	19304.8	65465144	369707575	6.97744e+06	903107400	277826275	141627	4739.81	19419914	670254350	609112	11772.3	164610350	59519.4	384164775
14	635077	1430261200	43877.7	288550775	27141560	27688110	145818138	8608034	793607650	47021.9	530577650	57549919	665028950	86090050	107898488	210648	146955350	1237910100	45552884	64261819	3471493	13693	88624269	13693	10704316	95960480000	32380653	337719625	3303.54	21404.4	9342.91	9859996	516697	6037544	13693	841803100	213830325	1750314	1953703400	1491818400	56805.6	4878.84	14462045	585122750	24923517	678483	46205828	739468	609548850
15	891677	524600250	45156.1	9274915	6.55091e+06	14316881	15280744	7634290	452018000	27802.1	113674075	65991569	660707750	116251738	93664931	96833.9	156122062	797267850	66632838	67697225	6219191	12371.5	61857975	12371.5	145646112	40739100800	30013972	371461775	62413.1	47409.4	5660.12	5.0619e+06	121668	1.59397e+06	12371.5	12286097	197648462	515797	1627494500	504694050	33446.9	2736.44	25982822	544810450	6153348	240227	118722812	179180	550703700
16	575950	850424500	30399.3	17360712	6.99359e+06	3.99312e+06	33961459	4822398	386126700	34598.1	472384600	144791800	467912850	89129469	96522169	135724	230674375	892754600	92644181	35189134	4056857	9202.29	57774300	9202.29	256748725	30195379200	50643084	246167075	327838	15693.8	22294.4	3468930	147526	2.40308e+06	9202.29	22831905	231008825	4.28279e+06	1071173600	596691050	129207	1721.38	25012986	802702250	2183704	64117.4	83813731	140427	644998650
17	1.45239e+06	531270450	28687.6	14046483	13238096	17551518	8920346	3952917	259078975	49208.6	104433281	49523934	881997600	72443931	44050647	135779	202636838	657733850	52551794	31887891	2048032	9410.47	79450819	9410.47	81687181	8709674400	15256844	473248250	71091.6	29716	23144.7	5.01165e+06	40399.2	1.23e+06	9410.47	68840469	144418388	601330	1612207200	430261150	57263.2	3143.84	19796306	568762950	32732697	965208	67317756	84478.8	589683000
18	913147	525283050	51268.5	9553781	4.71213e+06	2.63141e+06	22654717	6567287	330496275	33448.5	161469150	88991506	519419650	52918531	87783356	107279	118002762	1518708400	84803100	90110950	22477883	6767.41	159249650	6767.41	155463350	35234060800	30946922	271129000	20316.8	10277.2	9990.2	5.89756e+06	71094.5	972478	6767.41	22674831	169884362	1.73382e+06	1809517200	784194150	38282	4093.31	32864466	1048047800	5320627	207648	89538750	162421	632965600
19	999991	578628950	37090.1	74681350	8.32226e+06	8670865	17472486	5206999	358484800	6956.6	19562186	13159611	507473600	94353481	41169125	370405	117308712	576012750	33169712	37486097	0	3330.95	50039241	3330.95	48323347	21780984000	5129267	261494800	66657.9	3614.3	12757.9	3.76255e+06	27702	796806	3330.95	135402012	168142050	554144	1251053300	320978300	49886.8	2494.78	38375620	446186200	17679077	631529	18641711	205035	614851350
20	555064	680639750	36390	5781078	6.37935e+06	5.98765e+06	3302964	4148145	206875038	21658.6	72512631	42847709	460083750	73197219	150180962	45171.3	106331838	1011528700	49486309	33105116	0	3147.95	84087469	3147.95	51952253	17565736000	11933216	249126550	62102.7	11598.5	24591	3.16665e+06	123962	1.59147e+06	3147.95	31249159	186224262	1.58262e+06	1347434900	357070075	41041.6	1940.39	12658315	302930875	15401866	513316	76189075	128235	454360350
21	653978	935300500	41701.1	96853125	29777062	6661258	48556659	4883675	338986200	28651.2	246812725	34057103	903735700	42615353	126446350	147901	209401662	675293800	22564723	43548534	1518718	11579.8	134425250	11579.8	83471131	88451430400	18420067	487476850	86110	4733.46	17173.5	2.70147e+06	242208	5.09237e+06	11579.8	15009864	159984738	1.50826e+06	1588230700	1209152700	46341.7	3116.67	39939336	673313550	51994784	1558515	36172741	361723	462859450
22	760651	418656275	41484.1	16695106	1.82606e+06	2.11637e+06	18593883	3731156	371104100	28385	44537334	44563547	667745250	80523644	26384097	73346.2	148993038	842532900	48531312	228343900	1460118	8868.74	136230950	8868.74	496683750	8613157600	20260658	355720725	46448.6	22203.1	15964.6	4.1346e+06	52571.5	695792	8868.74	19298180	186281462	2.86217e+06	1117204500	319808575	94617.3	4943.97	13150508	568188000	31781266	1.06109e+06	49257441	71147.8	550785550
23	818531	669410050	34166.2	9526122	4116746	6.081e+06	4093402	6175823	216016600	11862.5	68372119	38653225	550230050	41850397	43938459	53011.4	149080438	573114750	28387372	166012612	5390878	5329.88	58344469	5329.88	201305188	48016204800	21233583	304133075	19095.8	9499.81	27502.8	10113827	74529	2.75281e+06	5329.88	101253000	158214750	64503252	1287389300	458708650	54915.9	1574.89	26920858	580897050	19614600	873092	56410300	87262.8	816317950
24	321853	704546950	22135	4931311	9083921	18785906	6936799	4520954	1577531500	8584.73	35129900	34884403	721248800	78384106	147252512	71411.7	172869400	1125844500	19251992	112308950	2899202	10188.2	75352156	10188.2	299725000	27202710400	22550431	391520925	91675.6	99311.2	30137	2.18985e+06	134210	1.43547e+06	10188.2	15418534	208192888	2.79123e+06	1500176700	211587850	50471	4526.63	37285240	350592075	50657978	1.92095e+06	62236050	58692.6	909932800
25	288183	1734947400	45287.3	18396142	4191604	13847747	32351778	18084742	221029175	96293.6	937323000	48563150	796389750	79460481	32522684	130190	130334950	327288800	75012294	36064734	9036450	7515.9	66069206	7515.9	254199425	82343622400	54100169	281243000	66329	21405.2	19448	10522064	305437	1850305	7515.9	17525586	169424200	1.06675e+06	1036959300	1143740000	67617.4	6324.03	15496097	850326900	15255464	534053	42094459	64560.2	706553350
26	1.00373e+06	1043097100	40466.8	15159069	39811236	38816480	19001369	9920876	200899788	96939.8	559617250	66190081	527801750	57492844	73412456	242814	148381388	778227850	52219716	53432356	8651227	6270.63	81624350	6270.63	70873769	61893292800	50080278	283008175	62088.9	11668.5	19027.4	10714484	303425	7806698	6270.63	41075934	175574338	2799575	1921807600	1428773900	55660.4	3612.34	23974792	901633700	19382848	735041	66418112	701597	1172054900
27	1138042	1242676500	62964.2	206614262	6.44873e+06	8533443	59264281	10236234	412936325	38928.8	356747800	47975725	553650900	44767175	125530112	269155	128341688	710964000	57606281	38986103	13434281	6336.81	154139850	6336.81	50964159	80839404800	86025756	291048300	173310	9532.91	12820.3	8446409	197692	2.65786e+06	6336.81	1243358700	107784938	1.3079e+06	1762162400	1280544500	49843.6	3643.34	25220486	443137350	12450256	358265	35923816	284655	840042700
28	793614	664296650	49503.4	11176180	10216511	10275350	47382425	3239228	238879725	7303.49	14409312	19736480	539202800	132294038	59150219	125717	123411412	798340950	21928019	47986678	24086436	96080.5	60813806	96080.5	81503906	30835481600	9897053	280900775	77852.9	4955.4	22266.4	2514342	48515.3	1.41994e+06	96080.5	99331469	186603750	3021178	1456129300	388629725	42853.2	4244.54	56778916	450906000	49376291	1.40083e+06	48770866	74530.6	486769250
30	1.50478e+06	953408000	34646.9	435053950	44474488	37769732	61917506	6231301	901367600	9501.02	66882619	51298566	771004950	49912638	89962225	575952	179236588	624146000	48330116	43597078	1514418	18248.7	84292481	18248.7	77292875	51423836800	21434092	395268500	397006	2297.13	11880.3	5293719	79339	3925014	18248.7	340606000	155626662	1.39584e+06	1694730800	1101922900	44383.9	4989.02	34271548	772163550	2280598	38367.1	47117047	188528	534066400
31	1.02282e+06	618945400	48792	43244428	6036778	7938428	18262294	5240694	496510800	19318.7	51642728	26856288	553945050	42941722	64870531	58633.9	134632488	554829900	20896339	58822706	2926428	7208.86	118234012	7208.86	68076869	21342180800	13836400	304346725	70682.2	10759.5	12603.4	10247168	78889.9	810692	7208.86	15076502	172594238	1.11491e+06	1538850700	406885425	51423.1	2963.28	18980686	419884600	5631442	172193	28957291	77241.4	896720900
32	792069	502963650	17045.4	6156076	3745319	5131369	4789914	1387631	185562350	1890.87	8412596	13512827	574989950	100858525	29406284	70414.6	134198350	539445050	31714666	43035566	2493051	16899.3	65375825	16899.3	294687525	31296259200	9947206	306870425	70250.9	8557.93	12939.1	2.44427e+06	68545	1000405	16899.3	804599	174425200	2210253	1048348500	549700600	45962.6	4459.31	10630085	162765688	2036936	87725.3	29174916	44403.5	362466275
33	603622	1394278800	49596.6	125869650	15926780	10984582	64134169	7833608	770089050	22845.3	152956288	29147116	659746250	31313094	20155480	178666	155011462	336124675	58789444	49024816	2106675	23839.5	224236475	23839.5	98011119	79311443200	18756906	361222475	48803	7307.73	20916.8	3897918	70538	2350330	23839.5	46370175	90778131	798923	1877579800	713177750	66503.3	6038.95	36903668	594545550	4745210	161459	51099559	210442	951515300
34	51094.4	883269900	72045.5	33054691	19726458	16486299	54735119	6134062	468546800	239815	1782654600	131496438	534627450	157239512	50598334	116000	130919988	509480150	85188531	59168356	12444437	44126.9	126932988	44126.9	16946911	3142602200	31140216	296959000	837.56	357890	49062.5	9850177	249778	2961976	44126.9	55773569	167555700	3.37717e+06	1096052900	1099800300	54959.4	4836.61	38707508	666973750	1628107	14551.8	74714950	299323	705354150
35	303318	571136350	51643.8	8420369	8.29168e+06	16296720	30154584	3742667	243029225	51713.5	150186538	56122200	984097500	118480612	90644419	51893.8	245762025	949735900	91382850	49602441	2940313	9373.52	127922412	9373.52	54870650	34584444800	23813031	515711700	32376.8	18465.6	27726.7	1.96551e+06	51866.3	2.13122e+06	9373.52	11914888	170121538	3042333	1056774500	707403750	55502.4	4025.26	17689882	544122850	757517	8663.82	61070231	70005.9	495602400
36	920159	732619200	40347.3	6535874	11768093	8738755	16524781	5742206	656675550	7699.02	42601059	27541656	598457200	90668994	46300872	94901.5	132874750	532907450	62181869	59035500	6037093	8474.93	112761812	8474.93	293835075	21163780800	32908606	317411875	125073	36468.9	32261.5	5.50773e+06	111232	2.30264e+06	8474.93	27028316	170552188	1.2265e+06	1288421300	338471175	72618.9	5713.45	18101584	691355050	27105422	789778	59344075	121336	900651100
37	819428	1081827300	35179.1	105997962	15249440	15468429	32590797	3100910	807027650	35473	313287300	34424609	475299150	114552950	91361006	194579	118378488	747563350	24387958	37872922	14411958	8408.5	248646400	8408.5	94579819	75576121600	47784275	252328100	172719	12605.6	27731.6	6.34105e+06	254335	3920892	8408.5	180685362	168654662	3.66685e+06	1406695700	466786200	50693.2	3909.53	14561384	619292200	38098472	843735	44696191	222458	495144150
38	628369	731474200	38687.3	12602365	5.76966e+06	1.26807e+06	20390800	6383136	444735800	56527.1	401818275	48843641	510644350	132765488	49631891	74439	122172650	630085150	72363094	49957900	7278966	14474.4	114787762	14474.4	156755838	23634500800	11570334	292611625	156910	108234	15501.3	4429918	166551	1.14459e+06	14474.4	185445462	200885700	1991976	1166243300	214245250	56812.1	4104.06	20901774	476231500	32235819	1.04445e+06	42840216	109290	529336450
39	1.18373e+06	558753850	42557.4	15852164	11443377	17174738	29015459	6020549	167385462	71118.7	131978038	21239005	517904100	70289869	34499609	151005	122288712	388270525	52688069	48194634	962977	12972	32754928	12972	157528600	32720876800	6586644	289792625	33241.7	14720.3	14840.4	3.71559e+06	32525.1	983566	12972	117427338	158230088	892692	1113708500	199038650	72171.9	4454.94	18514662	382607725	476550	4327.48	48461247	60635	888547800
40	799496	970250300	26624.5	8130222	4764048	4776840	7253509	3718686	215236000	11535.4	34140975	32951816	822546250	72054394	98066850	141168	200238262	958922700	54259594	44766497	36101559	8626.05	423789650	8626.05	52435356	65443961600	21253670	435353000	13331.5	76360.4	21824	2629747	76251.6	1.02228e+06	8626.05	11992853	203884662	744053	1826125800	496857550	54658.7	3154.36	25221378	284893000	17451630	702486	57757469	218823	812285350
41	1.03421e+06	581101750	33143.8	8047347	3.1179e+06	1.22563e+06	9062362	5132125	137028938	32735.4	264076075	54067269	841290600	78212500	64937062	90282.7	197002500	755832150	55298012	59254194	10298530	10154.5	635275350	10154.5	195726000	44622732800	19007939	466463000	192641	31562	21198.7	4.1096e+06	81442.3	1.22772e+06	10154.5	20248577	232681800	1.76131e+06	652892550	827801250	54021.8	2494.49	22775872	419010725	50708716	2256643	33851775	42727.3	568080550
42	181156	1055835500	43594.1	26450178	6.38422e+06	9212017	24296295	12711772	1095832900	51005.3	274870400	80226606	854619300	65723962	33617497	236108	222725625	552568250	58507438	60130094	4478539	23865.7	130091488	23865.7	256214900	38521558400	68314669	436771200	24534.4	96997.6	17273	5.23825e+06	285418	1628330	23865.7	26901459	161689462	783794	2189057600	4955271600	52518.8	6059.67	29722950	642809750	18824205	712757	64402325	304924	896280700
43	294023	363299375	24703.4	4262138	1.99256e+06	9165332	2007038	3916826	247466000	6280.05	6392157	13232981	574254150	192341688	75027444	26378.7	135528650	982116100	54482106	67739894	2573131	2248.51	417276775	2248.51	70548100	11623794400	6647363	328448100	22298.4	4210.12	12854.2	1.7255e+06	34444.2	948064	2248.51	34957762	183727338	920365	1206155300	87937100	48068.7	2776.2	14843472	532011900	16041184	573586	44905609	30242.5	585925450
44	1.00249e+06	797739750	41951.1	19251073	6.92902e+06	3958800	102845056	4786998	324999625	39205.8	250614700	29836872	910589600	71425150	10322130	324677	204287850	568826250	52087559	47496834	3793880	148361	220195275	148361	66020594	60433369600	15648034	492955450	214585	37123.4	15016.8	4424199	118969	2.29296e+06	148361	40788216	185231162	881721	1923542400	830332050	46400.7	2748.76	32575856	462502750	26676009	874546	37926250	127531	867807500
45	725675	1364823300	62976.6	451411750	38368388	38248336	125747700	9446780	516701350	11962.2	86625900	72477619	564782050	29623153	9069653	505974	154710738	317671275	46301297	40836425	1538432	3352.9	134385612	3352.9	69319019	78465401600	22839780	291106075	139291	3379.99	17280.8	5.70874e+06	401976	4.99279e+06	3352.9	17887123	199728138	1.11463e+06	1097777200	1991549000	32481.6	3863.44	16444288	556468150	15704317	365363	81271150	241512	870196000
46	889811	719524600	90743.4	26306862	6.1995e+06	12704688	45394562	6392514	374920675	85201.8	313127575	33555012	557489400	98534950	42132400	129194	127014725	754430400	72187150	56928481	4638299	12615.1	138452100	12615.1	249046150	56566304000	11357410	295037900	216275	19679.2	22697.1	6.58761e+06	181781	3.03392e+06	12615.1	32308212	119915300	2.88433e+06	1628948500	431737400	68624.4	4627.68	34487668	506923350	334588	13596.9	54620431	155574	715633850
47	1.23653e+06	840613100	57969	9230581	10441677	15966645	34356025	6924603	304497600	55419.9	273968400	56324950	572237950	198044838	29874841	401251	136173738	596816850	74451156	79711750	12446519	14602.4	5347454000	14602.4	106224162	22813708800	73526606	298181775	23078.2	29441.6	52521.7	7.34985e+06	156821	1.43944e+06	14602.4	13273431	141132712	2174786	1710378600	1177086700	78421.8	2023.51	22883926	654802050	23239695	694908	90310756	616232	725394350
48	792763	1097185200	45701.3	7977292	4.18417e+06	5117567	14760377	8539098	365687075	70383.8	282430125	67391812	964501700	111869400	82600631	113086	221943300	905836500	122493650	81366769	4014593	19740.3	130109525	19740.3	148850688	81406355200	26064373	525410950	237807	121008	26718.5	4.49145e+06	172420	2925134	19740.3	59242100	185933262	2.82876e+06	2153177600	502049900	47788.1	3545.86	17775390	734122000	892187	28706.7	91689731	105062	1074099500
49	505517	551269050	61539.5	14955783	5.57875e+06	2.21587e+06	14617112	5136875	202982962	42415.1	314381875	18449083	560624800	124925662	39906322	97356.3	134769200	620245200	43248766	28398528	3953019	15253.2	6294412400	15253.2	119476338	29670128000	13459355	314377600	85271.4	52556.3	31734.5	12008728	94483.9	866855	15253.2	13332739	219055625	924286	1304349300	298020775	57017.4	5578.46	9075867	209525100	4517988	159992	32959297	97604.2	775831750
50	763377	401574475	33111.7	12856862	4.66265e+06	6.84981e+06	20559669	4631852	463368050	17366.8	75704725	17811758	603505600	70895769	45146600	219994	143331462	776514550	51211175	103567850	11797730	4394.22	5663459200	4394.22	259724600	20609387200	7129123	334064525	104111	30547.4	10912.7	4.89677e+06	51222.2	462782	4394.22	52844356	164293762	824531	1714654400	210649175	42351.2	2428.46	14023339	298710000	1332499	61413.3	37531503	99040.6	753879150
51	715620	535760850	30541.5	6364498	11167413	18142458	1478854	6392443	126272738	9303.59	5766466	10116891	473683100	33282078	94585100	192605	114429150	732853550	21521942	28668272	1271695	36940	126874188	36940	31482988	7329038400	2922032	264635925	24891.7	1777.51	13271.9	19374538	5796.3	555214	36940	6588228	159612888	163488	2266845400	336839475	14058.2	4376.18	48194228	140875662	34764794	1.35656e+06	22340256	51678.8	432349600
52	793477	1753920200	37850.8	8306651	13695060	12291472	3896216	14041206	118292612	6087.15	16327542	31999522	443830600	63599169	57681044	149805	102857550	784853350	41075588	37428884	39147209	8509.45	94539000	8509.45	48211688	30153203200	14241298	227003375	146100	4653.16	30133.8	8155790	27884.7	1.78319e+06	8509.45	27103597	115670100	155056	1825105800	783388350	39534.7	25065.4	19883882	299436600	489392	4076.18	31522016	104030	478955200
53	6361.28	1182698700	72989.6	146072112	13066531	13056135	2260277	5459416	64155069	5523.02	10002262	22711206	377256425	103873794	69451119	228815	92017994	939428700	62737494	34803209	10024704	7048.18	91542056	7048.18	3893503	7408927200	19355123	189309538	2845.96	4328.67	19910.5	7661820	30332	3.85178e+06	7048.18	11027800	186333838	350775	1458279600	996621900	22797.4	5098.54	38928156	272831275	273436	0	40264112	273190	546458200
54	402434	853799100	51963.2	10101254	6.27867e+06	18321568	1968637	11379291	507135050	8087.23	15618544	25553305	911290000	73407594	43273728	255538	199233400	999453300	129764738	89206069	8124580	8395.6	127625012	8395.6	173054150	10988458400	4015425	468729500	54208.9	6338.66	32923.3	7.75363e+06	16432.3	974152	8395.6	15003088	157591450	185238	2412320000	1321054700	28646	5404.85	67396984	221161425	615251	11461.4	89819519	90081.6	1249329200
55	646561	1153170800	33056.4	7623572	10480889	13425795	5035758	17800033	139312138	8911.47	37492550	47552534	568836600	72060894	90025294	68848.5	160898100	773000250	12526254	35067709	256372725	33452.5	93198381	33452.5	74808500	18899051200	37742100	289469000	122992	8452.78	24033.6	3.29488e+06	183849	3.10164e+06	33452.5	7727966	93290950	1.26938e+06	1997083400	956984900	24234	45769.3	65373340	371383275	9454122	340092	57774962	234493	532169650
56	405837	682065350	26894.9	14770108	4.66569e+06	12151264	231608	8915691	95277631	6394.71	16736595	21802170	676598800	25254564	99228625	75339.4	198266750	1062917200	52380675	56635050	3352381	72818.7	231640275	72818.7	556380000	1612154800	2831132	346560475	18625.7	3456.55	12932.9	3791684	4627.91	466520	72818.7	8665423	197942912	207387	2257742400	3295468800	39799.1	1458.37	70774072	224312800	15392838	697923	79106500	26798.8	713343750
57	881706	1196961900	33189.1	23355975	9361341	17139606	10450015	8581290	128618112	16588.6	48447009	23464688	717001200	43257803	83143275	82143.8	183199062	643641150	27699103	62030875	14443064	21370.9	131851238	21370.9	209152188	21064747200	18920498	358815800	150151	7547.77	16722.9	6.18409e+06	32957.5	1.42124e+06	21370.9	38410891	151571662	486269	1682432000	1956295800	22916.2	4890.88	53214028	294613675	15660584	475521	32483759	273026	1054417900
58	411651	553695000	43646	4596964	562485	2.62106e+06	383187	7883406	114451475	3714.96	6496882	14556827	688876200	51135750	71886969	72189.9	167503788	811232400	32382959	27712966	1808800	98485.2	130992412	98485.2	49565500	4034625200	2005965	383134075	15521.1	6342.88	6000.62	2.78276e+06	3512.47	291209	98485.2	12091310	114437088	51007.9	1377159500	237195225	27977.8	2688.74	40646240	139794738	6012062	288262	26565253	60804.8	860117600
59	787235	711011200	34324.2	11394810	13427877	3270028	10610000	10477390	193023838	21781.4	104116206	35785228	876062500	118162475	65730856	121154	219796025	911506900	71929775	76734331	84590881	68532.6	214319475	68532.6	70830244	14828817600	16090189	404944125	57331.4	10455.8	25540.1	6.95388e+06	45954	1.32686e+06	68532.6	27367534	215819675	861893	1465569700	1215672500	38070.2	26677.8	45802284	428489850	19342962	603496	68449400	54853.9	760536800
60	735457	580206400	26962.6	6919038	4.98434e+06	4.85814e+06	1420972	7393534	37131562	6500.1	5881264	33068828	667302800	84933619	187119700	70345.3	187088538	1146891600	94255800	78634281	5302111	40316.8	105780088	40316.8	89937350	5793691600	3491239	334788700	39244.1	3013.4	8877.3	5.68011e+06	14521.2	111971	40316.8	3797104	335799700	68724	2229594000	321739725	37574.9	3157.22	28893478	176419462	77159031	3.39682e+06	64748775	15460.7	759465850
61	483776	563406750	46809.5	10351724	11791309	6679264	2309216	8577016	154733862	11129.2	21828833	18884433	564754950	46424297	65198606	238986	129210638	701256450	75264981	30035416	31393391	9323.88	228427250	9323.88	7017945	9487716000	8572403	294722925	19183.8	19393.1	15773.5	5473009	22892	2.19436e+06	9323.88	12694162	235114800	738607	2137449800	576612400	27145.8	11813.9	53344876	172042250	25280688	836596	32187747	169441	844871300
62	656947	1979220000	56980.8	20665619	3183410	2.06884e+06	4572772	9492725	123175112	12740.9	91012775	39061503	764691600	96697931	166786462	87180.2	210322075	985052700	50427225	32931800	126814438	10875.7	109530012	10875.7	52880119	30715840000	23458362	391961500	116522	3447.86	11721.3	3.73433e+06	152363	7748938	10875.7	17927555	138660300	667043	2329988000	1406548000	33994.3	21834.7	44284452	360671825	3606266	142778	115592688	191535	644089750
63	576367	901158400	109845	24037331	5243520	3.05104e+06	2311907	7513423	40449759	22033.7	97004344	88675706	1671461200	148080988	294784525	118811	332315275	1326678800	54458294	82242331	74588406	13138.8	167968212	13138.8	55053175	11017395200	32285925	702302000	88498.4	14899.6	52744.2	5160056	82519.5	2.74244e+06	13138.8	54333181	282143225	2485938	1697610600	2392375800	84265.7	25267.7	38993232	811946450	1661996	45942.7	118436438	154412	454015400
64	375042	687944000	35537.8	39798934	7104500	7475066	1448631	8062191	178305462	9192.4	7580990	14008955	490181950	87792106	80924194	59631.8	118140138	857294300	27063834	31194016	1085726	15557.1	33703725	15557.1	14788425	7834700800	3694847	266779825	75517.7	5275.58	13367.5	9588779	8673.21	1.2559e+06	15557.1	82755631	145043438	341731	1587298500	479316900	21060.1	3552.21	19047984	115729988	47593188	1.45307e+06	29343919	93935.3	402414600
65	573512	592238850	36645.9	16311025	3500914	9307374	2912289	8761012	112239788	8941.82	35415738	16530778	511681750	66076956	142350062	124639	119964650	1134897100	50635122	30631525	78754944	9509.16	90691750	9509.16	63139681	25040596800	6324611	275494150	79648.7	5251.86	15967.2	7.96545e+06	31895.3	4.00417e+06	9509.16	28591078	118977875	254492	1927852200	600580850	21900.8	29805	53396748	162561188	15906627	543767	37653038	432802	942687400
66	1.19563e+06	1462603700	38777.5	11321722	10746795	10721839	6047604	11481459	141698000	10125.5	56849512	56836281	510557750	73881381	62867206	121825	160493162	610632750	54797819	43533084	11356591	73018.8	103835050	73018.8	67114356	47780214400	31742456	271999575	248178	7077.33	21300.5	4834485	111469	1.78122e+06	73018.8	7048920	180572162	1.73132e+06	1390169100	1594050400	27384.4	3006.1	27805640	327749300	1170142	15256.9	115821500	204249	564719150
67	815752	338217200	30847	5396018	3.10684e+06	5535074	730199	9112432	78798919	6790.9	4089357	17840686	542264750	55382744	111588688	114864	121752312	680929550	41716075	31825750	4881568	25758	123418275	25758	102331881	6777274400	8309812	290313625	74503.1	4991.88	28959.6	4.52219e+06	19684.5	1.64917e+06	25758	19610381	154303800	504254	2203337000	410898375	33827	3943.68	26092182	279580375	39208438	1.08608e+06	41233134	88755.5	429321350
68	11327.3	265964900	30824.8	3725116	234604	535383	321091	8039130	44987172	5558.14	1959937	16205411	647894000	59028556	141593588	54911.2	149937000	1191443700	16578692	44187909	716127	2649.87	125474162	2649.87	37006366	175985700	2082604	358511825	9200.61	1302.45	4114	3.49994e+06	2352.63	136565	2649.87	9672831	169074750	195348	1856151000	122493212	22772.9	3320.67	28032208	81933200	3773538	220609	28231059	38131.5	527203450
69	875512	747737050	35292	7578132	2.93285e+06	2132234	1094081	5830570	50948216	7485.97	3622934	11210552	521095750	37249100	186021462	296807	124599350	956721500	27595066	26209767	0	14499.3	120076112	14499.3	49722525	7035456800	2875444	304371925	60785.2	2521.48	8756.88	3.25752e+06	22071.4	695677	14499.3	91641225	171270512	160430	2157464600	685466550	20447.8	2162.55	35977568	152660462	8848469	348286	22243945	56058.2	376662400
70	90533.5	594107350	44284.9	6161989	4119482	1.957e+06	198089	2920168	23022717	5456.51	2377944	12063303	543312150	49170034	155378800	106129	129897288	1423849200	45041041	36955428	0	26526.4	59000756	26526.4	0	405172900	1747127	292408700	10291.4	1876.13	8248.67	2696834	12394.6	618052	26526.4	31706862	197644800	152635	1371697500	442817000	20948.5	1025.8	8.1404e+06	126130112	10146124	453990	28840278	76939.3	264846300
71	226158	874818400	44992.1	76654044	16906986	9974635	4163427	9493794	97502819	8734.21	21035380	14029742	547218050	41821428	174957862	129362	125185012	781300400	37257075	24323017	6219653	93845.9	68339556	93845.9	20732500	11366573600	5792873	274485700	72966	5631.23	9466.47	3504524	26090.8	9450558	93845.9	25696650	142772462	186634	2831414400	1232922700	19555.8	5507.61	131191704	409897725	25989308	737188	25048208	253790	674484750
72	268711	820806350	61651.7	18051495	4035756	13227656	3227238	4681445	157060188	8341.87	15495748	19165264	628470950	124943638	67374875	70781	149226512	990173600	59923019	38301800	11761135	9574.79	113794800	9574.79	308798800	6081230000	8811925	316995175	27135.3	4644.07	19668.4	4.23262e+06	13340.6	439261	9574.79	14743052	248646275	291512	1553069500	869709300	37699.8	9277.13	22733898	197556238	20361730	787346	57838656	176993	659995800
73	158957	687997450	36024.8	8067930	1.34373e+06	10041527	432739	9491873	88827619	5448.32	3897740	23807658	569658150	99931081	177275250	40862.8	135459475	1114406000	28348997	45885650	11452543	11132.9	77425544	11132.9	10699893	708256400	5063003	312002600	4741.17	1563.23	10837.4	9283142	9829.53	1.40346e+06	11132.9	22731664	389680075	1.03126e+06	2017887600	658063350	20551.4	2557.68	34031796	225906500	9549726	459585	61854844	64829.6	948287900
74	348275	1303621100	34980.7	9407918	11245557	8464708	1549030	11264965	109156050	6656.38	15807583	31743356	594602850	48431622	31838466	131953	156934488	743589050	38270234	34349766	25179398	61205.4	79909450	61205.4	31420744	30753046400	35315750	322335175	136383	4804.28	22335	4.34526e+06	177266	2.64107e+06	61205.4	25607805	205335088	1.25447e+06	1896898400	1366180100	18986.1	8585.27	80009232	231687600	3628117	168009	48970578	312142	562698000
75	542900	399622275	31730.2	6015191	1.80715e+06	1.956e+06	696306	7314113	108133038	7900.48	3327630	14714433	553085600	133794438	106796638	29473.5	145110462	865793500	56905556	46311225	1810806	67132.8	81797100	67132.8	256177175	10001610400	2813514	307324075	72132.1	5875.53	14158.9	6.80941e+06	10971.7	115700	67132.8	9243873	185897912	104071	1772340200	189892250	21590.9	2603.77	18742046	100022000	17002673	1.00914e+06	35592197	28357.3	504171950
76	676565	785753800	25673.2	9085385	2267679	10720140	1418170	8336333	125699350	12022	9646544	13955148	545204450	63901019	113766138	157368	126330850	790618150	23215569	78803056	1148216	9642.29	89858050	9642.29	133775012	19366956800	5024435	284777325	200966	2981.4	16572.1	10998879	17508.3	1.66002e+06	9642.29	23570827	145675438	132635	2086951000	534170850	22462.2	3219.04	22594480	207871738	31389650	1.10887e+06	36683766	242004	916960700
77	962002	635373200	65446.7	18074294	6.08038e+06	5.68765e+06	10884459	11685612	110457450	26264.2	167406662	27951003	467539050	69707475	43861591	137041	119268338	730262150	29927116	38758734	271330575	130663	278216125	130663	49216897	29131072000	32956003	261619975	312960	7459.84	10199.2	8731936	49832.1	5788060	130663	84364769	228814575	689488	2517758600	1555770500	21043.7	76613.2	71363400	238406925	12793562	363637	34368703	160236	1457018400
78	409466	576246950	54391.3	5274488	8682261	9118809	1042826	6502338	83513506	10027.7	6773096	20097142	612459750	70754050	118179350	99412.9	152370712	622388950	22987506	42215709	6891870	52060	95408306	52060	44988712	18166188800	12668521	346375100	39361.3	3269.78	19808.7	3740786	88887.9	1.03114e+06	52060	29569588	152399012	1.02152e+06	2705318600	786255950	19457.5	2493.85	92152936	344434700	2836854	98930.1	44048772	177011	469856600
79	77497.2	417158800	37197.9	3667525	683424	2.43503e+06	329942	5218464	86898781	7867.41	1439504	9487907	627857750	55772375	10712619	49636.4	148114362	820262450	39213762	40312762	2273552	28173.8	82011531	28173.8	29522934	297797275	2649816	356083725	69883.9	4594.61	18420.8	4271646	2659.54	60576.1	28173.8	5904906	208277238	555949	2022857800	88636094	18620.1	2588.46	37872396	79376531	923612	59129.6	30315809	22677.9	499274800
81	683630	613706400	62081.4	16844242	7689468	7715712	652485	7026883	147322662	5191.21	21237206	16895539	570960200	26307634	53084062	79368.5	134578188	781975750	37033288	33459709	12835760	3583.75	92195450	3583.75	120365000	3652750800	4316732	313629725	75808	3667.04	10726.8	6.41714e+06	11722.8	963768	3583.75	17447023	202101412	878443	1990764600	367622225	24538	6039.56	33704268	237963475	1592498	64292.2	34106053	80428.6	560000750
82	2119.9	338995025	16074.8	4260717	1.40835e+06	934492	91076	3280481	28110750	885.31	3349255	20896158	935946800	79330119	243694450	45986.1	219290475	1346469700	63251125	24952511	0	7585.97	131855325	7585.97	0	22937020	1597906	498033150	3516.32	5516.12	14530	5.1203e+06	3967.53	113845	7585.97	14532605	184266138	64554.7	2001668000	999299200	17555.4	2893.49	48836752	71035406	21900055	1.51435e+06	34037691	19438	445667850
83	154425	220389325	28049	3355907	1.41198e+06	2.13966e+06	298237	2425286	47441128	8172.4	2583099	8008312	493177700	51529247	137277362	31972.3	116362325	1079029400	48046825	26661650	2776992	733.29	100888825	733.29	56707356	3612039600	2065670	285571675	27400.4	2000.89	10575	2.68915e+06	3415.62	91542.6	733.29	6663702	170263550	119728	1598741300	61368431	16781.8	3334.16	30002416	46664684	223363	5985.11	24787912	16072.3	535411250
84	6328.82	481509850	32987.2	5582367	532402	1.52549e+06	621788	4755339	66931756	8643.57	7255327	16835928	492286200	67725594	20242317	37057	124705225	665208400	33907559	43554891	5516817	3148.17	96728719	3148.17	7108223	18706183	2306190	285278925	777.13	2264.78	15764.5	7.86763e+06	10042.8	245642	3148.17	6862480	283710075	160531	1714982600	166486538	29790.3	4054.19	27695296	99684294	544285	11262.7	32513628	16860.3	951557300
85	683355	1223415300	63012.2	15303372	7.84341e+06	15831348	2629618	7295999	211476600	13367.2	36223175	42248375	1553580100	65354206	27424466	113306	386938000	677329150	7045379	27144516	106775912	23306.4	60625256	23306.4	66123338	36190515200	7388150	746852600	57584.3	6559.41	29775.5	6.26025e+06	38699.2	4.17715e+06	23306.4	5562253	384340400	372784	1563698900	2799222200	14564.7	115219	59205248	335442025	1419230	51452.6	44505641	395082	1046832200
86	427989	431001350	37073.8	6256817	6.53597e+06	10627673	441578	8929755	155109300	8311.39	2348220	17497125	530148800	42695025	39022141	48368.7	124874262	794783050	72728981	46097562	2062977	33793.8	72288869	33793.8	63466069	2387273600	3896895	291970400	76247.6	4823.85	14055.8	7.36042e+06	22186.3	1.43204e+06	33793.8	3569239	265571900	552706	2187557400	413365400	23551.3	5024.99	28473376	227867625	2141165	50225.3	44014425	89488.6	536357850
87	553105	400209475	18142.3	4767676	1.59906e+06	2.03e+06	382947	3122327	93971519	8576.99	3586068	7375218	414451600	75068156	3672096	39671.9	96628281	827291650	138798538	48068272	2740080	8705.64	57377419	8705.64	91426625	2282623000	1630096	226541525	104139	2659.23	11285	2.81222e+06	5928.43	552624	8705.64	21035256	262742725	221666	1737547600	66831700	28926	4613.33	18124716	60067069	1516123	57030.6	21797081	23108.4	861212600
88	155998	553453250	31296.6	6860023	1.91327e+06	3.88933e+06	1978664	8796810	104383600	6985.76	2414066	15712866	655590550	48390059	3610952	36945.9	142714850	1029912100	32154034	36042209	2570097	21965.2	167042012	21965.2	42751162	2255929000	2646619	340071075	48903.3	3343.06	11141.9	5737798	5444.33	219559	21965.2	42101766	275781800	215543	2262495000	155797300	24983.5	4216.97	30595426	116867912	2778976	130823	41551203	62623.9	607160650
89	448582	694911850	42372	17448609	4.89897e+06	5490011	9579737	7542785	148816600	41552.8	45848775	12595088	442345050	52122150	40325384	92103.1	111091575	710475600	15922445	34175341	18305275	4632.09	134671038	4632.09	21004555	6407062400	3306823	248500975	17945	7909.96	15677.9	5.07746e+06	18833.5	875070	4632.09	18990589	279203000	316792	1513081500	426961300	35456.5	5154.16	25982354	118757475	778367	15804.4	25262295	137138	748570950
90	576122	1020999500	49876.4	15291377	4676160	5840202	9995666	6597312	178178538	7964.62	52983394	29031609	1055749900	40071075	33921900	197861	237847300	669714050	44338950	14055933	28928278	19958.6	113626838	19958.6	7048546	39485328000	25304336	536644650	20027.3	6105.9	14524.7	3.43391e+06	62106.8	1.33976e+06	19958.6	21712600	200563562	677584	1775477200	1748214200	29049.7	29209.9	60461412	192813262	710242	40616.6	36425812	569577	664867150
91	1.1079e+06	796388950	47753	13046759	6.87594e+06	2.76545e+06	14230027	6184874	75865369	15061.5	237714325	59217625	1463141300	79198619	64366594	138449	295945925	1327039500	16907519	57789562	28920175	9022.71	200984500	9022.71	53743906	33169843200	54662275	586639450	78707.4	4599.3	10771.1	7.09687e+06	116309	2.24213e+06	9022.71	29458053	336499200	2.07444e+06	1369761100	2424623800	27894	4384.21	22968320	720616250	3214433	98497.2	56802194	80008.9	428132800
92	562297	1102978300	58894.9	13303411	3.8901e+06	2.7322e+06	31034091	8140454	339515525	25700.2	79632844	43578872	724932650	37956209	100647575	98296.9	165844238	979572700	40799875	36386100	18023738	27873.8	78060869	27873.8	84831775	34366681600	13236280	373626425	136694	15466.9	15534	4.59484e+06	37286.6	2.34458e+06	27873.8	36744709	252709075	865258	2105848000	1562622400	18095.6	48007.3	27005034	435013550	3372881	89347.4	44391950	253920	859908900
93	113590	621329850	50906.6	10850220	5.41206e+06	4.52766e+06	14534345	18635825	162984912	37643.7	33467066	34208688	730356050	104877388	94777219	47212.4	169394238	1021956000	46777041	45121134	3777141	63226.1	278523250	63226.1	68224719	11241461600	21737219	376021075	38869.3	15284.4	14522.3	4.39911e+06	53660	2778001	63226.1	7995374	275193850	924488	2741166600	957268800	33856.1	2437.15	29399590	344602825	582057	28735.9	88246769	96107.9	796873850
94	591609	691909850	49341.3	8352738	2024098	3.58177e+06	3286553	6256221	112504012	10431.5	12066438	20735505	1019005500	32432044	24724339	281916	232948100	683955650	26619697	13084519	2148784	18183.5	52811200	18183.5	59996019	8564144000	6739896	561148400	67121.8	2980.35	18644.9	5352500	10233.6	1366222	18183.5	51683575	272165025	193160	1763059800	766226250	19170	3058.49	43983092	120111200	2335795	90266.5	18434630	255138	728767600
95	659593	2237260800	56553.3	262169500	11259125	19418374	3667536	11163090	85700569	7938.47	126842750	39359588	406287100	93644200	30895166	317384	141615800	1042343300	68966369	25125680	20922008	6762.85	61290544	6762.85	11639749	14906038400	10458247	201493112	197441	5360.49	30105.3	9420781	33470.1	7.04721e+06	6762.85	10076032	343313475	737519	2097145400	1722681200	24423.2	23254.5	51999476	347384600	846345	7600.81	92455619	107624	663017200
96	569433	748913050	54693.3	9150634	4.04561e+06	11091989	2830859	13688131	235106000	14384.8	47584922	38764375	503182000	72315281	39325791	96174.5	114390275	1093215100	68120031	38111250	22856605	14666.7	146770162	14666.7	57326781	13558576000	5438463	251346025	67994.8	5565.86	27111.2	4.59884e+06	57092	2.76907e+06	14666.7	95827019	437781950	419173	1899351200	867024700	17057	6764.14	61963820	292396000	899520	9255.4	76185975	139323	764070400
97	467293	1818138400	43149.5	17849458	5.09959e+06	7743344	1685406	7901198	72816300	10554.1	90328944	39959041	491451100	79360119	73822369	265716	116926000	979034100	49310912	9110452	3957794	13180	111958550	13180	49982725	12476482400	23868731	256828375	81467.9	2180.43	39259.3	9307073	35443.6	1.86282e+06	13180	16102761	189965538	493148	2108229000	1520022800	28052.8	3957.73	24198098	249732600	3241126	62930.7	37154566	431387	541921950
98	582510	933133300	46635.2	11973176	1807496	5597636	486937	10395163	162976050	13842.7	29141453	19436775	460815750	40153959	73402975	148307	127214338	550269400	42448159	28574628	8480146	4435.89	645595200	4435.89	17184195	11934086400	3862516	263076475	67345.2	13407.9	16038.6	8766193	18886.4	1.4442e+06	4435.89	12824609	189284988	357055	1806007800	1394070700	19353.1	5687.87	58662084	254094075	3545105	138409	35625578	150446	759314750
99	474347	386232575	41233.6	12373677	10451348	4021230	308084	4218657	46358391	7610.82	4954653	20682314	493925850	52368359	53253056	111168	128442062	967545100	44455841	13222114	4090075	84250.8	84881100	84250.8	19762212	5594683600	2305649	266215225	107907	1038.31	15204.4	11348607	17578.3	1.02362e+06	84250.8	8595870	202805938	159473	1945010200	3219775200	38415.3	2942.28	15362528	114586462	1464214	46345.8	16577502	49456.1	407336675
100	104861	688277200	34399.9	10151120	2.71525e+06	8290630	3758781	8870969	151332500	10319.2	26028523	18754125	614084250	53606594	25469675	214864	154747112	561143550	58700819	28660659	1402795	94435	2437098600	94435	9555196	819973350	3367480	294219600	18365.9	7681.45	14706.7	4.94559e+06	29330.8	590072	94435	9771293	169549312	293457	2385343000	526028850	18608.9	1565.88	40263876	149050838	255909	0	33054497	78535	763368800
101	244219	283105825	20552.1	3480956	341823	3.65615e+06	523132	1685687	392036700	8165.54	3345457	8981863	490065850	53995462	43260762	76526.3	114516988	721342600	115361962	27353244	0	1128.18	168815538	1128.18	59854869	1700275400	1495630	282279800	17717.3	7213.67	7988.54	12028205	2091.73	30559.5	1128.18	5491241	221966675	158386	1705499000	56915075	18796.2	1893.11	37067968	73979600	8381788	531332	24001155	5193.55	513132350
102	296867	379802125	24152.5	8953976	1.96128e+06	5.35657e+06	1742825	8162502	1126120100	2483.05	6913566	20485662	648920600	208239200	70321156	101724	175841838	1004280100	85558194	54552481	1513271	5393.41	1089071700	5393.41	469824400	5985800400	4485454	330171475	32864.4	5996.51	14749	5.17291e+06	11026.2	66237.5	5393.41	4400147	280064725	269562	1836999400	206261400	48313.3	4938.98	37168228	189960288	5701357	221286	57611000	14288.5	721942250
103	17671.3	432350950	32444.8	4915068	860102	1.42757e+06	193180	1715534	254181025	8892.8	2535071	15104908	566921850	81654256	59300794	73746.9	133567762	1122700300	133079138	24048112	0	2215.8	74345725	2215.8	39707078	2036496800	1744604	317370075	2303.94	8104.33	14313.8	2.1525e+06	11956.2	80892.2	2215.8	11103043	238336300	261217	1566218400	86659019	17099.9	4527.99	42479124	106929550	6733102	404545	45728462	12999.5	599070850
104	3154.08	429526950	29357.2	4893239	1.81216e+06	18115502	385178	4145748	1420665600	8832.04	1582485	14728898	636864550	142865862	61502531	54235.9	149508688	957258700	21768212	13856089	815481	1873.77	67092219	1873.77	63590019	516648800	3002390	351522200	1294.52	1870.35	18727.4	4.94758e+06	6977.59	52042.3	1873.77	6900116	181643188	453874	1925989800	131133338	24134.8	5004.94	36312412	208444312	139809	2653.09	63663525	37023.1	668549450
105	772902	581556250	19078.6	7275773	733899	4564372	1852579	3931690	223034750	4648.21	22702705	22408577	671198950	84713769	36647175	96687.6	159041662	736502800	105374788	107838000	2538263	4878.36	230473875	4878.36	237343100	9113587200	4379872	370078675	34746	17152.8	9134.26	2.7902e+06	14129.6	79839.8	4878.36	10745460	215016875	145335	2194174800	147377300	30422.3	3751.42	74027424	151461812	18876133	1.22547e+06	62162869	19307.5	682011050
106	160007	395120325	13450.1	3910734	319928	699999	228835	2102988	143738562	4449.54	2062724	18061556	890246700	55124844	80611844	34198.5	213235575	1019138100	70690469	20471008	0	3537.69	100442544	3537.69	29170391	1446169500	1595914	505507650	2816.9	2970.98	12019.3	2.5648e+06	6314.8	29975.4	3537.69	4116604	195391438	180392	1608331700	75762850	35849.4	2632.26	31648130	62242819	3459912	382089	28680612	5184.72	590925600
107	399149	429897150	17896.7	4671886	954640	9273301	2242196	2884570	172313100	7245.41	1894297	15207608	640521850	42809538	19385383	36558.2	151570388	1053404000	73489781	37198372	2210640	41711.6	166480800	41711.6	170648450	2397855000	4249021	353296225	10519.9	9159.02	15976.6	3.17092e+06	5262.65	35761.7	41711.6	4349328	331724275	310428	2102267600	102444281	24234.7	5846.56	66568164	110107638	982926	66815.6	54655688	7824.73	432162850
108	176170	407601325	19855.9	12523676	262452	1.36764e+06	1438523	2722068	308475200	5585.46	3068906	19990102	707126450	62969581	67582950	44896.9	162662388	1414681100	84918725	30251009	524172	2091.91	265088975	2091.91	221451275	2975240800	2462055	364711025	12122.1	36337.5	2776.61	2082323	6409.21	20406	2091.91	5025063	473923950	135859	1489689600	126928625	62167.1	3215.9	23166594	147548312	42247584	2.90663e+06	62247444	20820.2	868985400
109	211426	483852150	11086.7	3506513	349021	3.2898e+06	462875	2008893	760865000	10632.8	2032714	13149700	551152950	90134600	35534434	93702.8	129189912	795849750	69019419	14828272	0	3771.49	127738962	3771.49	11369635	1312982400	2502602	304763725	7764.57	6834.78	9195.01	5697696	2663.05	26813.1	3771.49	8184747	162938962	232246	2176055800	59576444	18613.4	4177.08	74862336	115316512	4544792	344862	42463012	11050.4	773339850
110	98589.9	470087950	25197	6310020	744111	5.01189e+06	1736866	1830446	318718975	16166.5	50944509	12225271	610731200	80347831	13488027	141970	139123862	521671350	57708844	27392841	2188813	11548.9	133103112	11548.9	51213334	1378729500	2356809	341481200	1776.98	11219.4	13561.2	3835510	5849.66	32477	11548.9	16295639	139937488	293496	1104971200	94085381	29857.7	3020.01	31720880	101176919	55064512	3.7521e+06	27744056	14202.7	603713650
111	662646	620493250	43073.7	6561865	1.36679e+06	5.72342e+06	1835152	4515839	254914275	10668.2	10488204	15252750	713745050	95011669	64115256	192099	168234738	1076818100	50174291	22858070	890854	26626	164201838	26626	248081900	7418836000	3360489	392052400	5079.13	10253.8	9963.52	4.53416e+06	12407	162628	26626	28659972	204112638	384448	2197591000	155131812	32102.5	4263.63	53755872	152252362	17513061	943893	51749072	81223.9	572199450
112	573388	507772050	26113.6	5706704	543716	1.90018e+06	1360820	5324908	341939900	6963.21	7214577	16245742	486083150	59297231	56792331	82177.1	146854088	843193600	78149119	25324705	0	3401.3	187080938	3401.3	21391658	5869690800	3280721	264095175	13563.1	5604.37	4472.41	3.12951e+06	11726.4	271088	3401.3	6975226	172201250	440123	1688248600	101343831	21442.9	4270.94	43267332	147751400	31393400	1.71004e+06	60115262	154260	1011261100
114	368375	331373025	18982.4	3590401	273709	1.69695e+06	193946	1396358	138585762	1565.58	2505473	14383372	550844050	46693159	17870320	27835	129683212	579822150	99048256	21702162	0	2829.54	46591612	2829.54	85014244	2866223000	1586849	304038575	2310.87	9439.17	11028.2	3039957	6257.51	32110.2	2829.54	16086173	144864638	111143	1482747500	52694581	22616.2	3819.82	11682952	74903769	81834869	6.15619e+06	29975488	15649.4	549760350
115	731879	391044600	20821.5	4307812	980111	5.04553e+06	366664	3222022	199944750	7270.08	1661323	16795055	587203600	33647294	39807172	213843	132405950	854567800	32450531	38099541	0	3440.36	116594938	3440.36	164605500	4736314000	1885174	313558275	12116.3	3781.17	6219.15	3.14286e+06	7226.24	131025	3440.36	5055870	118368912	315370	1451361100	72595450	24674.6	2261.71	36685068	126610550	2001159	77376.2	47186584	36265.5	653125050
116	661122	589964800	26553	6810176	1.58249e+06	11736321	4476470	3811650	307797600	18307.9	135637300	14839998	521139950	79269119	36566859	114082	159104488	829762950	51845272	30840159	1361527	7269.79	162763038	7269.79	101976119	10263631200	3094418	279559925	32990.2	27024.2	3065.28	3.43317e+06	16569.6	159129	7269.79	29866328	204828238	731497	1821709800	119175862	34921.1	2461.15	48429008	155602212	4591933	237642	54608150	24302.9	759858000
117	376967	410974225	20315.6	4883331	1.04863e+06	10798378	372315	2028299	657694400	5300.72	2423861	14120398	624799800	74220006	30974394	154170	145750762	1089039300	97073381	93278519	0	4422.49	148445700	4422.49	154009638	1816787800	3740787	341293175	41334	18585.5	13242.1	3537688	12900.9	43281.2	4422.49	7315354	223883375	405988	1562500900	94592025	33312.7	2746.75	36311000	158247738	20793617	1.33981e+06	53390694	16841.6	573040250
118	8493.87	488443350	33386	7639422	628496	2.33109e+06	838184	7265753	315292725	6536.3	4819939	22122694	778704000	103023181	106407612	244946	186624438	646924650	59659462	15099070	851897	10285.6	438702600	10285.6	7589293	4534734400	2728712	419015025	1478.09	9753.2	6719.13	6.27452e+06	20682.9	114319	10285.6	10931313	164315650	305301	1675321500	190562700	26348.5	2751.58	95568024	184839138	2704469	191123	66010719	41430.6	743003750
119	450634	486197400	28644.6	5372778	287019	2.68628e+06	387962	3915757	484677150	6583.26	3926561	14209947	545818250	104045850	42237316	80348.3	148193838	875303300	87341950	24485408	3634078	3723.33	75472019	3723.33	96641481	4960142400	1958382	300513425	56998.7	3129.95	10568.3	3.69504e+06	17805	47330.9	3723.33	12310965	217893275	316667	2143614000	90925025	24465.8	3129.93	34744892	111275138	18080992	1.08783e+06	44479412	16000	626501400
120	732959	565364000	36401.9	7956591	2.71165e+06	7.4918e+06	1011373	2828815	458475450	4481.92	5624646	23493786	672607750	64975681	13781689	383690	210861250	1272458800	39677703	57595519	4781452	1040.14	192530162	1040.14	136295088	9795311200	4126629	328130075	34679.5	1877.17	15109.4	2.78226e+06	35397.8	114462	1040.14	4957442	307041000	266516	1404426500	327531925	21537.7	1253.88	63783308	223011425	2309594	114727	59743819	72610.5	706996450
121	18920.6	668875350	29323.5	7983990	1.23087e+06	2.72041e+06	5372854	4852150	416270875	8966.43	15128352	12307130	585163200	26060536	2328626	77490.6	139445675	842224500	111239575	27512184	775341	7233.26	112231788	7233.26	45915838	11824732000	2619153	320600600	87116	11956.8	14160.5	2.7149e+06	20959.1	237264	7233.26	14040634	191739900	290638	1891411200	160704262	35508.3	4846.47	51928540	107849825	614157	9112.92	35147497	47999.8	803797150
122	526928	318251325	28761.9	7248008	208712	1.12395e+06	1990205	2048021	346073275	7349.48	5787332	13742245	762768450	119490138	37898178	175743	183220838	897914900	97883869	35794097	0	4185.01	93362281	4185.01	527282550	3141475200	2003899	414025800	4062.85	8789.2	3739.35	3.46251e+06	4336.24	28430.8	4185.01	13919031	169373400	488832	1882358600	112028288	32295.3	4031.51	28610206	138052900	51649950	3.03261e+06	44126334	34938.1	603435400
124	350034	335640175	22685.1	6910553	4.08546e+06	5.77688e+06	364077	6033599	888944400	5829.46	4252928	15495803	612503050	139201100	76033300	195793	138541925	903539700	49114678	18049230	0	10729.5	74283756	10729.5	25099655	2771543800	3083354	330528225	1612.16	257410	27417.3	2.79123e+06	13201	138702	10729.5	27517122	107678162	290595	1565593500	129555212	41493.6	3049.27	78661672	184229562	8154516	509084	52300397	43622.1	607857750
125	67906.2	399564500	23370.1	4940339	577188	6.81452e+06	213670	3003980	135396175	6057.34	2622182	13346177	548735250	91308069	21934892	38572.6	153971712	674243450	84442856	35364091	0	2222.26	56530031	2222.26	102915750	6707387600	2666545	313868700	16328.5	18714.6	5429.23	2.46566e+06	13054.9	71152.8	2222.26	3133288	136496738	376342	2628285000	75594650	19944.4	3601.83	64677200	117896162	15939836	1.11336e+06	40630141	17506	672981450
126	578261	497206450	24010.6	5547047	1.12014e+06	14413456	397659	2193413	327379875	5305.59	14401692	14112602	623239750	97382350	30527747	74594.2	150259062	942916700	104411006	72778119	0	2257.03	99539181	2257.03	55461519	4148788000	5171656	349404625	19073.7	9546.1	10423.9	5.30586e+06	18872.2	78503.4	2257.03	36386400	173919762	171755	3436876400	112606250	25297	5267.4	47399220	196637838	18851119	1.32075e+06	53986469	59932.3	1057618200
127	695328	358190725	27269.5	4770151	584649	3.58931e+06	661656	2967168	152916100	7731.21	3104699	11854500	460852400	46950375	21463105	148072	115679750	628874200	63969125	21966150	7739922	2327.62	293298875	2327.62	77137281	6726733600	2372207	268317600	19002.1	7948.75	7451.01	4.91889e+06	11156.5	78605.5	2327.62	5640784	161042112	234961	1951937400	90150575	19574	2797.7	32398826	91490156	6400017	447549	21186062	51270.6	650734550
128	139182	411551675	20610.6	4550321	720015	5.58891e+06	574783	1806731	316508000	4623.52	1918801	9822722	491180250	49356628	46187897	34847.8	117327562	890132100	69291019	24468842	0	2123.58	81007500	2123.58	129755612	2459156000	2323380	271014700	10701.6	3979.63	10647.5	2627481	2413.61	32255.7	2123.58	22703886	170272150	343784	2289828000	50763950	23854.8	3373.19	42938228	81110919	1387986	71685.7	39084762	27964.8	865384200
129	132430	178511412	20520.1	3995226	118719	702321	1334762	2496296	929178400	8306.98	1844082	12481879	649399150	44387484	18704062	67077	152115788	467048650	84163656	124951688	0	5053.21	64244494	5053.21	370704775	4821423600	1980921	354978325	3215.27	10872.9	7479.08	7.05862e+06	4647.51	17768.4	5053.21	4343829	199427538	119569	1644346700	65846962	20111.7	2831.65	61212492	61201975	6317792	410220	21081356	23232.9	779953350
130	212799	404398100	16111.8	7624966	216679	3502001	1350999	1476654	475834650	6206.65	1428461	27227853	486239600	189702600	64118981	115624	121617838	816248600	92061219	13758106	2153709	803.84	103457600	803.84	99200475	2384648000	2505065	283363875	97469	3218.87	10932.3	2375670	14209.4	30549.2	803.84	2720386	157134088	397096	2437044800	67840694	24381.2	3076.97	23390806	124307738	8231642	516854	41151212	40908.6	449054250
131	286333	654624600	22292.5	4841742	410581	3045032	435080	2940659	222166475	1430.15	623115	14506656	522324050	100872644	57652400	29679.4	134376975	811417850	63080712	25950139	831861	2183.97	164820000	2183.97	31502138	2838433600	2328765	308160900	4049.78	3395.86	4098.53	3.52368e+06	9107.59	31181.9	2183.97	13953853	192303438	158129	1472167500	76426000	27219.2	4740.45	29167542	128327125	5450276	319360	38721328	14836.7	882697200
132	4529.93	798734750	19532.3	4941468	46424.1	451374	92921	1776182	127736688	5443.53	1030172	11118534	496195450	84776469	11003684	27269.6	117932150	918351300	92386394	21171186	0	2771.94	70527631	2771.94	4010636	851728800	3180747	271253725	725.32	3663.7	5253.56	1.93585e+06	2129.61	37138.5	2771.94	12842235	231955175	92960.6	2060986800	125804188	15915.5	2166.96	29276166	103750744	579274	6943.94	38513609	22618.1	813340800
133	126990	479018600	25122.3	3788677	172142	1.75016e+06	496223	1794855	211951325	6433.19	1746931	10289931	543623350	111750225	37276584	35906	124161412	824373250	84076631	85333550	0	762.58	129886488	762.58	60525162	5133478400	2388124	301302925	7515.23	13004.5	11020.6	3077782	5435.06	27958.8	762.58	5470592	121218150	95988.8	2030944000	46765600	27360.8	3157.67	26780278	72105306	230138	11190.7	48496791	19965	611729800
134	10295.8	640978450	30244.1	5464976	655120	2867453	601525	3161266	129557912	6806.46	7310073	9975156	510557650	60803288	2266088	21831.8	117618562	634838050	83481350	18489617	2718494	1830.51	53452069	1830.51	4168992	67599850	2879089	282865775	613.24	16103.7	4642.46	6631154	10113.7	104821	1830.51	7923443	160343100	287900	1783276800	80625869	44318.9	2803.54	34665704	112555738	305956	6533.32	20795945	38622.7	766441000
135	767362	693443450	35150.7	6892855	385423	9838809	157319	2115309	462036000	10952.4	7242058	14714445	478791400	38088838	4008116	34637.3	374160400	475043500	53025394	66453106	1783878	5489.25	162124400	5489.25	259511600	11539074400	2003201	274749325	5232.83	57290.2	8437.61	3.73098e+06	4868.17	78805.9	5489.25	11208760	149599900	102623	1853959600	79042969	25238	2876.76	59186732	109514512	337602	1622.87	32117631	165402	1002512900
136	198706	421101450	26416.2	3897845	483372	4008841	223309	1915565	357470675	7001.53	1114980	11202053	562773550	57597106	34929984	53607.8	131448875	577061950	67821256	46432572	0	3101.25	109542612	3101.25	100182081	2138621000	2291751	320694600	14137.6	4418.42	20494.5	6.62503e+06	3010.19	23821.1	3101.25	6723534	155377638	289293	1433640900	67318206	36212.8	2032	26828466	80533019	3154536	157962	37268316	16322.5	620863400
137	543567	594284400	20902.9	4036852	488716	3.98486e+06	118919	1886803	134471762	11281.4	546979	11284202	508593150	36689497	21922175	68759	110554925	933933700	66552431	97180406	0	3409.52	96955719	3409.52	32828744	3624894000	2237058	291145325	8066.98	4235.7	10489.8	3.18345e+06	6006.76	59314.9	3409.52	5307291	195804500	347912	2183495000	61380019	24139.9	4028.93	28938394	89547125	186388	6134.92	46439559	23938.8	1010144500
138	263021	373748075	23148.8	5660873	979048	2694727	404005	2235108	239208625	5590.04	1895310	12533531	521159800	64234706	18094911	36832.9	126488375	655812000	92840044	25659000	0	2699.52	119028188	2699.52	44707141	3803791600	2489996	289315125	34090.4	2842.67	1699.72	3.76722e+06	2375.24	47067	2699.52	18090055	180865888	287475	2045350400	46920409	29769.8	2922.91	26270288	113195562	3691929	240904	35518350	24294.7	636792000
139	977324	695390950	31462.2	10300285	544215	885575	4288009	4259904	333487600	7862.41	22288530	13475275	452299450	60885631	3263206	132034	113041900	426281850	91339125	53252256	0	4999.85	85837569	4999.85	104247344	20363976000	2114395	262408800	23494	5797.1	7199.29	6.41367e+06	17831.5	84187.3	4999.85	7723462	122868938	222812	1255355700	120740888	46527.3	3211.68	39224396	213617325	351384	1726.03	36201009	32773.5	821570050
140	965429	1135339500	40278.9	7604121	2.07042e+06	4.08334e+06	408141	5015066	265864275	8145.04	9163365	33283072	485947600	72093000	30129009	231221	117692300	611375600	100709300	44147309	0	3352.82	49705975	3352.82	98594000	21241624000	3800034	272977575	6267.48	4826.91	9456.6	3.11217e+06	25624.7	502056	3352.82	9106366	134518062	312067	1731887400	235211000	43513.1	3201.28	41726532	123892662	552979	2860.78	46604362	187266	1100629900
142	116071	483562950	22007.7	4653316	142387	897824	162561	985272	260600675	8198.74	2318508	13859873	628622750	95357731	7295755	46905.8	159452400	886017900	87254875	31065122	0	3299.92	56430344	3299.92	120428488	1794002200	1753434	354611700	1378.36	2306.15	4354.15	3.01017e+06	3454.67	31360.2	3299.92	21041436	194173138	217490	1923053600	75005106	19289.6	1378.85	18366774	120254438	133349	0	25873252	25598.8	638440400
144	346004	962986100	24030	6967437	520106	3646522	1092575	2981428	273988700	6721.72	3826074	16864805	760221050	109054962	17277255	141004	186142912	859341700	96858269	34869525	4051511	4976.63	37361191	4976.63	4895735	3917008000	6397946	424142150	1077.52	13633.4	0	3.70343e+06	9515.93	78577	4976.63	12532353	228569825	313323	2253015400	147391062	25186.6	4100.5	27293258	118194662	537393	6985.36	34029316	50556.3	692927750
145	294928	712572800	21730.9	2888952	200692	5.35175e+06	643173	2366184	776570800	3410.2	574006	17445292	456642650	87504319	26886497	108508	139147675	633870450	84942794	22742733	818441	2778.17	55009400	2778.17	51603028	4103408800	2786516	264935875	8508.99	6694.39	4272.52	2.56708e+06	3867.3	50460.3	2778.17	11329834	164220862	437235	1576261100	71598494	31193.6	2064.06	32158832	98329844	181402	5793.34	71799950	31600.4	1159194000
146	358969	405598025	23454.1	5046970	210904	2321071	330258	4482190	294004475	4816.22	1742084	17745362	490616400	41105366	26308722	50903.2	118064012	902683500	75470550	18883236	0	3368.5	115349738	3368.5	126896538	3284934600	3068728	277074175	22399.5	2542.94	11448.7	2925480	4320.28	100177	3368.5	31505250	187260538	237158	1856862400	70587469	22250.2	5244.9	85814880	102155550	175998	1585.6	51067075	14796.9	825126450
147	707093	422904650	36599.6	8259931	2.87484e+06	5.65284e+06	1315615	5486095	201950600	6336.98	4657624	19875181	534242750	65122675	30761666	178014	128116862	639726000	44254547	13370670	851520	3182.66	107024938	3182.66	58271744	8889453600	5266868	302762200	18567.6	5432.04	16783.7	4.05049e+06	12125.6	232017	3182.66	7713049	115366950	375066	1381796300	189320938	27541.8	1456.47	24991382	107935012	294402	33267.2	34024378	113456	436175500
148	253331	643472650	22899.5	6562570	359036	433234	1957496	4055080	289203375	12372.5	71111900	33500297	822484200	70301331	48903603	58974.6	187957362	797758150	102679850	34647944	848759	1712.73	159265600	1712.73	56820044	10612765600	4475580	407878800	19190.2	37446.7	0	4499874	13190.2	69324.9	1712.73	24539833	154324488	360826	1771731000	163843162	37221	3674.65	33289786	304291400	1050894	33347.2	80032281	36663.7	996604500
149	839088	399963500	29380.3	11470041	596885	3.6956e+06	2119196	2725466	385629925	20327.6	150622688	13751586	555715250	46155241	19721912	68022.5	125328688	492001600	32158938	30886009	865001	17527.3	123414212	17527.3	67215694	10742948000	3240874	300624375	18963.2	48435.5	7742.42	8130036	8871.35	112269	17527.3	18672230	133753762	131419	1719446400	125531150	26276.9	2734.76	12029528	98523450	15147945	634132	21763525	14646.9	719597650
150	514994	475722250	26489.1	19904950	5.01157e+06	17608752	1697548	7703621	761836000	8131.54	7130420	11811643	586091550	92063075	15453033	249053	137227988	722204200	76145575	26576847	0	3734.13	188335000	3734.13	90423806	4235850000	3267387	335987200	46840.2	10350	12580.2	6089266	11133.9	326346	3734.13	28421225	152740162	623646	1691825000	151919062	12480.7	1702.07	20774680	93651931	213977	8841.92	21683005	46049.2	635892600
QCMS9	691427	3.141e+06	39877.3	339875	4384102	7.99244e+06	75676.3	18543.4	2.7221e+06	16879.2	599316	144066	3349609	431264	353699	137447	941968	5902924	291453	209166	36896.3	17465.5	2.37646e+06	17465.5	560879	185389552	91062.3	1894806	50119	21004.1	16379.1	5055100	65977.1	1.33006e+06	17465.5	252287	1.63309e+06	1.30961e+06	10784785	225530	33513.2	5004.51	36046732	1.4927e+06	114070	527471	258776	105546	3871214
QCMS16	669300	4.2642e+06	33279.6	302006	5570710	5697040	116240	40866.9	2.58802e+06	11809.9	624724	235361	4.58035e+06	411615	358400	133712	1.27946e+06	5.21492e+06	263491	255437	74819.8	16966.9	3758404	16966.9	714364	147949456	105902	2.39614e+06	62449.3	20614	11533.8	5.0027e+06	66999.3	1.10034e+06	16966.9	221114	1.35645e+06	1.20548e+06	12895717	4.29141e+06	77843	3919.71	33480174	2.94189e+06	117464	402551	368537	51184	5.33073e+06
[truncated: 177 more columns]
